# Supplementary material for: Stereoselective amination via vinyl-silver intermediates derived from silver-catalyzed carboxylative cyclization of propargylamine
Source: Royal Society of Chemistry journal article supplement (doi:10.1039/d0cc02273j), 2020-01-01

## Supporting Information

### Stereoselective Amination via Vinyl-Silver Intermediates derived from Silver-Catalyzed Carboxylative Cyclization of Propargylamines

Yuta Sadamitsu, Kodai Saito, and Tohru Yamada\*

### Contents

|                                                                    |            |
|--------------------------------------------------------------------|------------|
| <b>1. General</b>                                                  | <b>S2</b>  |
| <b>2. Synthetic Procedure &amp; Characterization Data</b>          |            |
| <b>2.1 Procedure for the Synthesis of Propargylamines</b>          | <b>S2</b>  |
| <b>2.2 Examination of the Effect of Bases</b>                      | <b>S4</b>  |
| <b>2.3 Procedure for the Synthesis of Aminovinylloxazolidiones</b> | <b>S5</b>  |
| <b>2.4 Procedure for the Control Experiment using DPPH</b>         | <b>S12</b> |
| <b>2.5 Transformation of Aminovinylloxazolidinone</b>              | <b>S13</b> |
| <b>3. NMR Spectra</b>                                              | <b>S16</b> |

## 1. General

The  $^1\text{H}$  and  $^{13}\text{C}$  NMR spectra were recorded with a JEOL model AL-400, ECX-400, or ECS-400 spectrometer using  $\text{CD}_3\text{CN}$  or  $\text{DMSO}-d_6$  as the solvent. The IR spectra were measured with a Thermo Electron Corporation model NICOLET 6700 FT-IR spectrometer. The melting points were measured with a Stanford Research Systems MPA100. The ESI high resolution mass spectra were obtained using a Waters LCT Premier XE mass spectrometer. Column chromatography was conducted on silica gel (CHROMATOREX PSQ 100B Fuji Silysia). The  $\text{CH}_3\text{CN}$  (anhydrous), DBU, DEAD, and  $\text{AgOAc}$  were purchased from Wako Pure Chemical Industries, Ltd., and used without further purification. DBAD was purchased from Aldrich. MS 3A was purchased from Junsei Chemical Co., Inc.

## 2. General Procedure & Characterization Data

### 2.1 Procedure for the Synthesis of Propargylamines

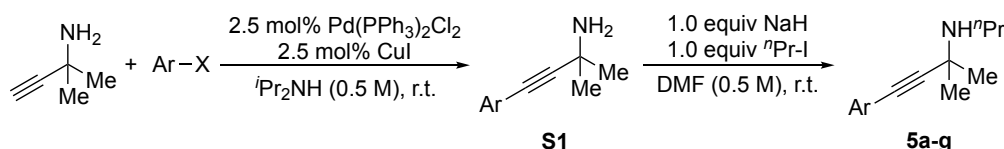

Propargylamines **1a-1g** were synthesized by the following literature. To the solution of  $\text{Pd}(\text{PPh}_3)_2\text{Cl}_2$  (0.25 mmol, 2.5 mol%),  $\text{CuI}(\text{I})$  (0.25 mmol, 2.5 mol%) and the corresponding aryl iodide or aryl bromide (10 mmol, 1.0 equiv) in  $i\text{Pr}_2\text{NH}$  (20 mL), 2-methyl-3-butyne-2-amine (11 mmol, 1.1 equiv) was added dropwise and the mixture was stirred at room temperature for 12 h. Then, the reaction mixture was filtered through a celite® pad, and the filtrate was evaporated under reduced pressure. After the solvent was removed, the residue was purified by column chromatography ( $\text{SiO}_2$ , eluent: *n*-hexane:EtOAc=5:1, then *n*-hexane:EtOAc:Et<sub>3</sub>N=75:25:1) to afford the desired compounds (**S1**).

To the solution of NaH (1.0 equiv) in DMF (10 mL), **S1** (1.0 equiv) in DMF (10 mL) was added dropwise and the mixture was stirred for 30 min at room temperature. After that 1-iodopropane (1.0 equiv) was added dropwise and the mixture was stirred. The reaction mixture was quenched with ice water and the mixture was extracted three times with EtOAc. The combined organic layers were washed with brine and dried over  $\text{Na}_2\text{SO}_4$ . After the solvent was removed under reduced pressure, the residue was purified by column chromatography ( $\text{SiO}_2$ , eluent: *n*-hexane:EtOAc=4:1, then *n*-hexane:EtOAc:Et<sub>3</sub>N=67:33:1) and the bulb-to-bulb distillation or recrystallization to afford the desired starting materials (**5**).

The synthesis and characterization data for propargyl amines **1a** (Ar = Ph)<sup>1</sup>, **1b** (Ar = PMP)<sup>2</sup>, **1d** (Ar = *p*-chlorophenyl)<sup>3</sup>, and **1e** (Ar = thienyl)<sup>2</sup> were previously reported. The

propargylamines **S1c** (Ar = *p*-dimethylaminophenyl)<sup>4</sup>, **S1f** (Ar = *o*-Tolyl)<sup>5</sup>, and **S1g** (Ar = 1-naphthyl)<sup>5</sup> were already known compounds.

#### ***N,N*-Dimethyl-4-(3-methyl-3-(propylamino)but-1-yn-1-yl)aniline (1c)**

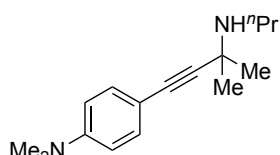

The reaction was carried out with the corresponding propargylamine **S1c** (1.55 g, 7.66 mmol), NaH (336 mg, 55%, 7.70 mmol), and iodopropane (0.75 mL, 7.7 mmol) in DMF (15 mL). The product was recrystallized by cold *n*-hexane; Pale yellow solid (1.08 g, 57%); mp 60-61 °C; <sup>1</sup>H NMR (400 MHz, CD<sub>3</sub>CN): δ = 0.93 (t, *J* = 7.2 Hz, 3H), 1.34 (s, 6H), 1.45 (tq, *J* = 7.2, 7.2 Hz, 2H), 2.67 (t, *J* = 7.2 Hz, 2H), 2.91 (s, 6H), 6.61 (d, *J* = 8.8 Hz, 2H), 7.19 (d, *J* = 8.8 Hz, 2H); <sup>13</sup>C NMR (100 MHz, CD<sub>3</sub>CN): δ = 12.3, 24.5, 30.2, 40.4, 46.9, 50.8, 82.9, 93.4, 111.1, 112.8, 133.1, 151.0; IR (KBr): 2962, 2213, 1613, 1524, 1363, 1161, 816; HRMS (ESI): [M+H]<sup>+</sup> calcd for C<sub>16</sub>H<sub>25</sub>N<sub>2</sub><sup>+</sup>, 245.2012; found, *m/z* 245.2005.

#### **2-Methyl-*N*-propyl-4-(*o*-tolyl)but-3-yn-2-amine (1f)**

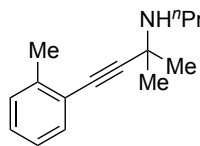

The reaction was carried out with the corresponding propargylamine **S1f** (1.88 g, 10.9 mmol), NaH (436 mg, 55%, 10.0 mmol), and iodopropane (0.98 mL, 10 mmol) in DMF (20 mL); Colorless liquid (1.62 g, 70%); <sup>1</sup>H NMR (400 MHz, CD<sub>3</sub>CN): δ = 0.93 (t, *J* = 7.2 Hz, 3H), 1.38 (s, 6H), 1.46 (tq, *J* = 7.2, 7.6 Hz, 2H), 2.38 (s, 3H), 2.70 (t, *J* = 7.6 Hz, 2H), 7.06-7.15 (m, 1H), 7.16-7.24 (m, 2H), 7.27-7.34 (m, 1H); <sup>13</sup>C NMR (100 MHz, CD<sub>3</sub>CN): δ = 12.3, 20.9, 24.5, 30.2, 47.1, 51.1, 81.0, 100.5, 124.2, 126.6, 128.8, 130.3, 132.4, 140.7; IR (KBr): 2996, 1485, 1458, 1378, 1262, 1173, 756; HRMS (ESI): [M+H]<sup>+</sup> calcd for C<sub>15</sub>H<sub>22</sub>N<sup>+</sup>, 216.1747; found, *m/z* 216.1744.

#### **2-Methyl-4-(naphthalen-1-yl)-*N*-propylbut-3-yn-2-amine (1g)**

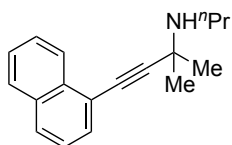

The reaction was carried out with the corresponding propargylamine **S1g** (2.24 g, 10.7 mmol), NaH (436 mg, 55%, 10 mmol), and iodopropane (0.98 mL, 10 mmol) in DMF (20 mL); Pale yellow liquid (1.67 g, 62%); <sup>1</sup>H NMR (400 MHz, CD<sub>3</sub>CN): δ = 0.94 (t, *J* = 7.6 Hz, 3H), 1.31-1.54 (m, 8H), 2.77 (t, *J* = 7.2 Hz, 2H), 7.37-7.46 (m, 1H), 7.48-7.63 (m, 3H), 7.76-7.92 (m, 2H), 8.26-8.35 (m, 1H); <sup>13</sup>C NMR (100 MHz, CD<sub>3</sub>CN): δ = 12.3, 24.5, 30.1, 47.2, 51.2, 80.1, 101.6, 121.9, 126.4, 126.7, 127.4, 127.7, 129.1, 129.2, 130.9, 134.0, 134.2; IR (KBr): 3058, 2966, 2213, 1587, 1460, 1279, 1245, 1016, 799, 562; HRMS (ESI): [M+H]<sup>+</sup> calcd for C<sub>18</sub>H<sub>22</sub>N<sup>+</sup>, 252.1747; found, *m/z* 252.1747.

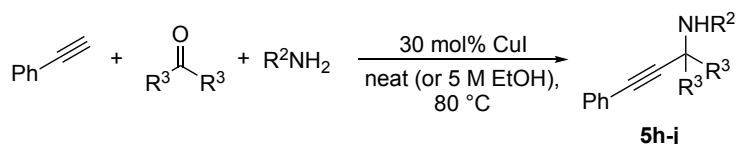

Propargylic amines **1h-1j** were synthesized by the following literature.<sup>6</sup> The mixture of alkyne (20 mmol, 1.0 equiv), ketone (20 mmol, 1.0 equiv), and amine (20 mmol, 1.0 equiv) together with CuI (6.0 mmol, 30 mol%) was heated at 80 °C for 8 h. After cooled to room temperature, the reaction mixture was diluted by Et<sub>2</sub>O and filtered through a short pad of silica gel. The filtrate was evaporated under reduced pressure, and the residue was purified by column chromatography (SiO<sub>2</sub>, eluent: *n*-hexane:EtOAc=4:1, then *n*-hexane:EtOAc:Et<sub>3</sub>N=67:33:1). The further purification was conducted by bulb-to-bulb distillation to afford the desired propargylamine (**5**).

The synthesis and characterization data for propargyl amines **5h** (R<sup>2</sup> = Bn, R<sup>3</sup> = Me)<sup>2</sup> and **5i** (R<sup>2</sup> = PMB, R<sup>3</sup> = Me)<sup>2</sup> was previously reported.

### 3-Ethyl-1-phenyl-*N*-propylpent-1-yn-3-amine (**1j**)

The reaction was carried out with ethynyl benzene (3.3 mL, 30 mmol), 3-pentanone (3.2 mL, 20 mmol), *n*-propylamine (2.5 mL, 30 mmol), and CuI (1.71 g, 9.00 mmol); Pale yellow liquid (792 mg, 12%); <sup>1</sup>H NMR (400 MHz, CD<sub>3</sub>CN): δ = 0.83-1.01 (m, 9H), 1.36-1.51 (m, 2H), 1.53-1.70 (m, 4H), 2.61 (t, *J* = 7.2 Hz, 2H), 7.25-7.33 (m, 3H), 7.34-7.40 (m, 2H); <sup>13</sup>C NMR (100 MHz, CD<sub>3</sub>CN): δ = 8.5, 12.4, 24.6, 31.2, 46.0, 58.3, 84.1, 95.1, 124.6, 128.8, 129.4, 132.3; IR (KBr): 3057, 2965, 2218, 1599, 1489, 1379, 1147, 755, 691; HRMS (ESI): [M+H]<sup>+</sup> calcd for C<sub>16</sub>H<sub>24</sub>N<sup>+</sup>, 230.1903; found, *m/z* 230.1905.

## 2.2 Examination of the Effect of Bases

In a 30 mL Schlenk flask, molecular sieves 3A (200 mg) was added, and the equipment with MS 3A was heated under reduced pressure. After cooled to room temperature, the flask was purged with N<sub>2</sub>, then AgOAc (1.7 mg, 0.010 mol), propargylamine **1a** (40.3 mg, 0.200 mmol), CH<sub>3</sub>CN (2 mL), base, and DBAD (69.1 mg, 0.300 mmol) were added sequentially. After the mixture was cooled to -40 °C for 10 min, CO<sub>2</sub> (balloon) was charged. The temperature was kept at -40 °C until the reaction was completed. After 12 h, the reaction mixture was diluted by EtOAc and filtered through a short pad of silica gel (eluent: EtOAc). The filtrate was evaporated under reduced pressure, and the residue was dried *in vacuo*.

Yields of products were determined by <sup>1</sup>H NMR using trimethylphenylsilane as an internal standard. Results of the examination were summarized in Table S1.

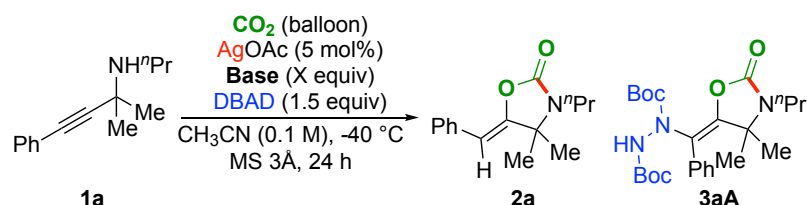

**Table S1.** Examination of the effect of bases

| Entry | Base              | X / equiv | Yield <sup>a</sup> | 2a /%           | 3aA /% | 2:3   |
|-------|-------------------|-----------|--------------------|-----------------|--------|-------|
| 1     | PPh <sub>3</sub>  | 1.0       |                    | >99             | nd     | 100:0 |
| 2     | Et <sub>3</sub> N | 1.0       |                    | 65 <sup>c</sup> | nd     | 100:0 |
| 3     | MTBD              | 1.0       |                    | 51              | 29     | 64:36 |
| 4     | BTMG              | 1.0       |                    | 25              | 73     | 26:74 |
| 5     | DBU <sup>b</sup>  | 1.0       |                    | 9               | 87     | 9:91  |
| 6     | DBU               | 0.50      |                    | 53              | 42     | 56:44 |
| 7     | DBU               | 0.25      |                    | 62              | 37     | 63:37 |
| 8     | DBU               | 0.10      |                    | 67              | 32     | 68:32 |

a) Determined by <sup>1</sup>H NMR. b) 12 h. c) The starting material **1a** was recovered in 30% yield.

### 2.3 Procedure for the Synthesis of Aminovinylloxazolidiones

The procedure using DBAD was described below. In a 30 mL Schlenk flask, molecular sieves 3A (200 mg) was added, and the equipment with MS 3A was heated under reduced pressure. After cooled to room temperature, the flask was purged with N<sub>2</sub>, then AgOAc (1.7 mg, 0.010 mol), propargylamine **1a** (40.3 mg, 0.200 mmol), CH<sub>3</sub>CN (2 mL), DBU (30 μL, 0.20 mmol), and DBAD (69.1 mg, 0.300 mmol) were added sequentially. After the mixture was cooled to -40 °C for 10 min, CO<sub>2</sub> (balloon) was charged. The temperature was kept at -40 °C until the reaction was completed. After 12 h, the reaction mixture was diluted by EtOAc and filtered through a short pad of silica gel (eluent: EtOAc). The filtrate was evaporated under reduced pressure, and the residue was purified by preparative thin layer chromatography (SiO<sub>2</sub>, eluent: *n*-hexane:EtOAc=3:1) to afford the desired product **3aA** (76.4 mg, 80% yield).

The procedure using DEAD was described below. In a 30 mL Schlenk flask, molecular sieves 3A (200 mg) was added, and the equipment with MS 3A was heated under reduced pressure. After cooled to room temperature, the flask was purged with N<sub>2</sub>, then AgOAc (1.7 mg, 0.010 mol), propargylamine **1a** (40.3 mg, 0.200 mmol), CH<sub>3</sub>CN (2 mL), and DBU (30 μL, 0.20 mmol) were added sequentially. After the mixture was cooled to -40 °C for 10 min,

DEAD (14 mL, 0.3 mmol, 40% solution in toluene) was added dropwise, and then CO<sub>2</sub> (balloon) was charged. The temperature was kept at -40 °C until the reaction was completed. After 12 h, the reaction mixture was diluted by EtOAc and filtered through a short pad of silica gel (eluent: EtOAc). The filtrate was evaporated under reduced pressure, and the residue was purified by preparative thin layer chromatography (SiO<sub>2</sub>, eluent: *n*-hexane:Et<sub>2</sub>O = 1:2) to afford the desired product **3aB** (84.0 mg, quant).

**Di-tert-butyl-(Z)-1-((4,4-dimethyl-2-oxo-3-propyloxazolidin-5-ylidene)(phenyl)methyl)hydrazine-1,2-dicarboxylate (3aA)**

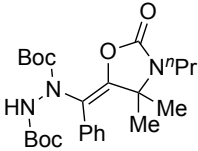 White solid (76.4 mg, 80%); mp 146-147 °C; <sup>1</sup>H NMR (400 MHz, DMSO-*d*<sub>6</sub>, 110 °C): δ = 0.87 (t, *J* = 7.2 Hz, 3H), 1.14 (s, 6H), 1.20 (s, 9H), 1.47 (s, 9H), 1.58 (tq, *J* = 7.2 Hz, 7.2 Hz, 2H), 3.05 (t, *J* = 7.2 Hz, 2H), 7.30-7.45 (m, 5H), 8.43 (s, 1H); <sup>13</sup>C NMR (100 MHz, DMSO-*d*<sub>6</sub>, 110 °C): δ = 10.4, 21.3, 25.0, 27.2, 27.4, 40.7, 60.6, 78.5, 79.7, 116.1, 126.9, 127.9, 130.9, 132.2, 147.9, 151.8, 152.0, 153.8; IR (KBr): 3290, 2979, 2936, 2879, 1776, 1717, 1365, 1163, 1022, 725; HRMS (ESI): [M+Na]<sup>+</sup> calcd for C<sub>25</sub>H<sub>37</sub>N<sub>3</sub>NaO<sub>6</sub><sup>+</sup>, 498.2575; found, m/z 498.2583.

**Diethyl (Z)-1-((4,4-dimethyl-2-oxo-3-propyloxazolidin-5-ylidene)(phenyl)methyl)hydrazine-1,2-dicarboxylate (3aB)**

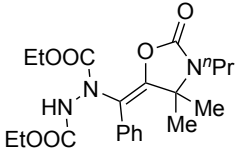 White amorphous (84.0 mg, quant); <sup>1</sup>H NMR (400 MHz, DMSO-*d*<sub>6</sub>, 110 °C): δ = 0.87 (t, *J* = 7.6 Hz, 3H), 1.01 (t, *J* = 7.2 Hz, 3H), 1.15 (s, 6H), 1.20 (t, *J* = 7.2 Hz, 3H), 1.58 (tq, *J* = 7.2, 7.6 Hz, 2H), 3.05 (q, *J* = 7.2 Hz, 2H), 3.85 (q, *J* = 7.2 Hz, 2H), 4.13 (q, *J* = 7.2 Hz, 2H), 7.30-7.45 (m, 5H), 8.95 (s, 1H); <sup>13</sup>C NMR (100 MHz, DMSO-*d*<sub>6</sub>, 110 °C): δ = 10.4, 13.5, 13.6, 21.3, 24.7, 40.7, 59.8, 60.7, 61.3, 115.7, 127.1, 128.1, 131.0, 132.0, 148.9, 152.0, 153.2, 154.8; IR (KBr): 3290, 2979, 2936, 2877, 1782, 1728, 1402, 1336, 1234, 1090, 1025, 758, 712; HRMS (ESI): [M+Na]<sup>+</sup> calcd for C<sub>21</sub>H<sub>29</sub>N<sub>3</sub>NaO<sub>6</sub><sup>+</sup>, 442.1949; found, m/z 442.1956.

**Di-tert-butyl-(Z)-1-((4,4-dimethyl-2-oxo-3-propyloxazolidin-5-ylidene)(4-methoxyphenyl)methyl)hydrazine-1,2-dicarboxylate (3bA)**

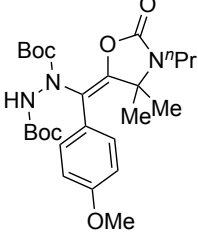 White solid (95.1 mg, 94%); mp 180-182 °C (decomp.); <sup>1</sup>H NMR (400 MHz, DMSO-*d*<sub>6</sub>, 110 °C): δ = 0.87 (t, *J* = 7.6 Hz, 3H), 1.15 (s, 6H), 1.22 (s, 9H), 1.44 (s, 9H), 1.58 (tq, *J* = 7.6, 7.6 Hz, 2H), 3.05 (t, *J* = 7.6 Hz, 2H), 3.78 (s, 3H), 6.92 (d, *J* = 8.4 Hz, 2H), 7.25 (d, *J* = 8.4 Hz, 2H), 8.36 (s, 1H); <sup>13</sup>C NMR (100 MHz, DMSO-*d*<sub>6</sub>, 110 °C): δ = 10.4, 21.3, 25.0, 27.3, 27.4, 40.7, 54.7, 60.6, 78.5, 79.6, 112.8, 115.8, 124.5, 132.2, 147.7, 151.8, 152.1, 153.8, 159.2; IR (KBr): 3301, 2978, 2934, 1771, 1718, 1514, 1369, 1246, 1159, 1141, 835, 760; HRMS (ESI): [M+Na]<sup>+</sup> calcd for C<sub>26</sub>H<sub>39</sub>N<sub>3</sub>NaO<sub>7</sub><sup>+</sup>, 528.2680; found, m/z 528.2679.

**Diethyl (Z)-1-((4,4-dimethyl-2-oxo-3-propyloxazolidin-5-ylidene)(4-methoxyphenyl)methyl)hydrazine-1,2-dicarboxylate (3bB)**

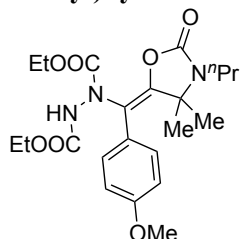

White amorphous (90.0 mg, quant);  $^1\text{H}$  NMR (400 MHz,  $\text{DMSO-}d_6$ , 110  $^\circ\text{C}$ ):  $\delta$  = 0.87 (t,  $J$  = 7.2 Hz, 3H), 1.03 (t,  $J$  = 7.2 Hz, 3H), 1.16 (s, 6H), 1.19 (t,  $J$  = 7.2 Hz, 3H), 1.58 (tq,  $J$  = 7.2, 7.6, 2H), 3.05 (q,  $J$  = 7.6 Hz, 2H), 3.78 (s, 3H), 3.88 (q,  $J$  = 7.2 Hz, 2H), 4.12 (q,  $J$  = 7.2 Hz, 2H), 6.92 (d,  $J$  = 8.4 Hz, 2H), 7.26 (d,  $J$  = 8.4 Hz, 2H), 8.88 (s, 1H);  $^{13}\text{C}$  NMR (100 MHz,  $\text{DMSO-}d_6$ , 110  $^\circ\text{C}$ ):  $\delta$  = 10.3, 13.5, 13.6, 21.3, 24.7, 40.7, 54.7, 59.8, 60.7, 61.2, 112.8, 115.4, 124.2, 132.3, 148.7, 152.1, 153.2, 154.8, 159.3; IR (KBr): 2978, 2936, 1780, 1727, 1402, 1356, 1248, 1028, 759; HRMS (ESI):  $[\text{M}+\text{H}]^+$  calcd for  $\text{C}_{22}\text{H}_{32}\text{N}_3\text{O}_7^+$ , 450.2235; found,  $m/z$  450.2230.

**Di-tert-butyl (Z)-1-((4,4-dimethyl-2-oxo-3-propyloxazolidin-5-ylidene)(4-(dimethylamino)phenyl)methyl)hydrazine-1,2-dicarboxylate (3cA)**

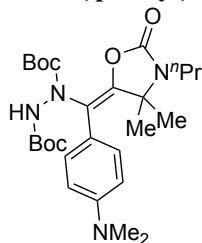

White solid (101.9 mg, 98%); mp 174-175  $^\circ\text{C}$  (decomp.);  $^1\text{H}$  NMR (400 MHz,  $\text{DMSO-}d_6$ , 110  $^\circ\text{C}$ ):  $\delta$  = 0.87 (t,  $J$  = 6.8 Hz, 3H), 1.17 (s, 6H), 1.24 (s, 9H), 1.44 (s, 9H), 1.51-1.54 (m, 2H), 2.91 (s, 6H), 3.05 (t,  $J$  = 6.8 Hz, 2H), 6.69 (d,  $J$  = 7.6 Hz, 2H), 7.13 (d,  $J$  = 7.6 Hz, 2H), 8.26 (s, 1H);  $^{13}\text{C}$  NMR (100 MHz,  $\text{DMSO-}d_6$ , 110  $^\circ\text{C}$ ):  $\delta$  = 10.4, 21.4, 25.0, 27.3, 27.4, 39.4, 40.7, 60.7, 78.4, 79.5, 110.7, 116.4, 119.5, 131.6, 147.3, 150.2, 152.0, 152.3, 153.9; IR (KBr): 3315, 2976, 2933, 2876, 1776, 1716, 1366, 1162, 757; HRMS (ESI):  $[\text{M}+\text{H}]^+$  calcd for  $\text{C}_{27}\text{H}_{43}\text{N}_4\text{O}_6^+$ , 519.3177; found,  $m/z$  519.3180.

**Diethyl (Z)-1-((4,4-dimethyl-2-oxo-3-propyloxazolidin-5-ylidene)(4-(dimethylamino)phenyl)methyl)hydrazine-1,2-dicarboxylate (3cB)**

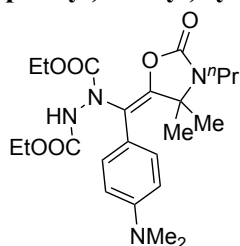

White amorphous (92.7 mg, quant);  $^1\text{H}$  NMR (400 MHz,  $\text{DMSO-}d_6$ , 110  $^\circ\text{C}$ ):  $\delta$  = 0.87 (t,  $J$  = 7.2 Hz, 3H), 1.04 (t,  $J$  = 6.8 Hz, 3H), 1.17 (s, 6H), 1.19 (t,  $J$  = 6.8 Hz, 3H), 1.59 (tq,  $J$  = 7.2, 7.2 Hz, 2H), 2.92 (s, 6H), 3.04 (t,  $J$  = 7.2 Hz, 2H), 3.88 (q,  $J$  = 6.8 Hz, 2H), 4.11 (q,  $J$  = 6.8 Hz, 2H), 6.68 (d,  $J$  = 8.4 Hz, 2H), 7.13 (d,  $J$  = 8.4 Hz, 2H), 8.81 (s, 1H);  $^{13}\text{C}$  NMR (100 MHz,  $\text{DMSO-}d_6$ , 110  $^\circ\text{C}$ ):  $\delta$  = 10.4, 13.6, 13.7, 21.3, 25.0, 39.3, 40.7, 59.8, 60.8, 61.1, 110.7, 116.1, 119.1, 131.6, 148.1, 150.1, 152.2, 153.3, 154.8; IR (KBr): 3301, 2980, 2935, 1778, 1724, 1371, 1336, 1239, 761; HRMS (ESI):  $[\text{M}+\text{H}]^+$  calcd for  $\text{C}_{23}\text{H}_{35}\text{N}_4\text{O}_6^+$ , 463.2551; found,  $m/z$  463.2556.

**Di-tert-butyl (Z)-1-((4-chlorophenyl)(4,4-dimethyl-2-oxo-3-propyloxazolidin-5-ylidene)methyl)hydrazine-1,2-dicarboxylate (3dA)**

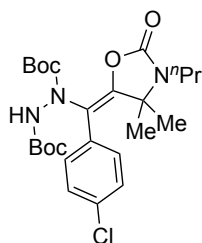

White solid (47.6 mg, 47%); mp 180-181 °C (decomp.); <sup>1</sup>H NMR (400 MHz, DMSO-*d*<sub>6</sub>, 110 °C): δ = 0.87 (t, *J* = 7.2 Hz, 3H), 1.16 (s, 6H), 1.22 (s, 9H), 1.44 (s, 9H), 1.58 (tq, *J* = 7.2, 7.6 Hz, 2H), 3.06 (t, *J* = 7.6 Hz, 2H), 7.35 (d, *J* = 8.0 Hz, 2H), 7.42 (d, *J* = 8.0 Hz, 2H), 8.49 (s, 1H); <sup>13</sup>C NMR (100 MHz, DMSO-*d*<sub>6</sub>, 110 °C): δ = 10.3, 21.3, 25.0, 27.2, 27.3, 40.7, 60.6, 78.6, 79.9, 114.9, 127.2, 131.2, 132.7, 133.1, 148.4, 151.7, 151.9, 153.8; IR (KBr): 3301, 2978, 2935, 2882, 1771, 1755, 1718, 1370, 1156, 1017, 834, 757; HRMS (ESI): [M+Na]<sup>+</sup> calcd for C<sub>25</sub>H<sub>36</sub>ClN<sub>3</sub>NaO<sub>6</sub><sup>+</sup>, 532.2185; found, m/z 532.2194.

**Diethyl (Z)-1-((4-chlorophenyl)(4,4-dimethyl-2-oxo-3-propyloxazolidin-5-ylidene)methyl)hydrazine-1,2-dicarboxylate (3dB)**

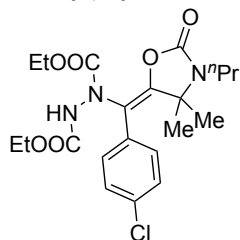

White amorphous (61.6 mg, 68%); <sup>1</sup>H NMR (400 MHz, DMSO-*d*<sub>6</sub>, 110 °C): δ = 0.87 (t, *J* = 7.6 Hz, 3H), 1.03 (t, *J* = 7.2 Hz, 3H), 1.17 (s, 6H), 1.19 (t, *J* = 7.2 Hz, 3H), 1.59 (tq, *J* = 7.6, 7.6 Hz, 2H), 3.06 (t, *J* = 7.6 Hz, 2H), 3.88 (q, *J* = 7.2 Hz, 2H), 4.13 (q, *J* = 7.2 Hz, 2H), 7.36 (d, *J* = 8.8 Hz, 2H), 7.42 (d, *J* = 8.8 Hz, 2H), 9.00 (s, 1H); <sup>13</sup>C NMR (100 MHz, DMSO-*d*<sub>6</sub>, 110 °C): δ = 10.3, 13.5, 13.6, 21.3, 25.0, 40.8, 60.0, 60.7, 61.4, 114.5, 127.3, 130.9, 132.7, 133.3, 149.5, 151.9, 153.2, 154.8; IR (KBr): 2980, 2937, 2878, 1783, 1729, 1401, 1336, 1234, 1090, 947, 758; HRMS (ESI): [M+H]<sup>+</sup> calcd for C<sub>21</sub>H<sub>29</sub>ClN<sub>3</sub>O<sub>6</sub><sup>+</sup>, 454.1739; found, m/z 454.1742.

**Di-tert-butyl (Z)-1-((4,4-dimethyl-2-oxo-3-propyloxazolidin-5-ylidene)(thiophen-2-yl)methyl)hydrazine-1,2-dicarboxylate (3eA)**

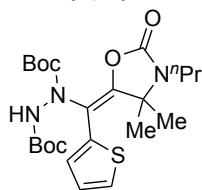

White solid (24.4 mg, 25%); mp 144-145 °C; <sup>1</sup>H NMR (400 MHz, DMSO-*d*<sub>6</sub>, 110 °C): δ = 0.87 (t, *J* = 7.6 Hz, 3H), 1.19-1.31 (m, 15H), 1.45 (s, 9H), 1.59 (tq, *J* = 7.6, 7.6 Hz, 2H), 3.08 (t, *J* = 7.6 Hz, 2H), 7.00-7.07 (m, 2H), 7.59 (d, *J* = 5.2 Hz, 2H), 8.46 (s, 1H); <sup>13</sup>C NMR (100 MHz, DMSO-*d*<sub>6</sub>, 110 °C): δ = 10.4, 21.3, 24.7, 27.3, 27.4, 40.8, 61.0, 78.6, 79.9, 109.2, 125.6, 127.7, 130.4, 133.0, 151.4, 151.7, 151.8, 153.9; IR (KBr): 3242, 3156, 2975, 2939, 2880, 1782, 1717, 1369, 1331, 1159, 1018, 758, 717; HRMS (ESI): [M+Na]<sup>+</sup> calcd for C<sub>23</sub>H<sub>35</sub>N<sub>3</sub>NaO<sub>6</sub>S<sup>+</sup>, 504.2139; found, m/z 504.2136.



**Diethyl (Z)-1-((4,4-dimethyl-2-oxo-3-propyloxazolidin-5-ylidene)(thiophen-2-yl)methyl)hydrazine-1,2-dicarboxylate (3eB)**

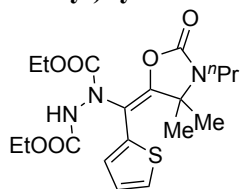

White amorphous (70.1 mg, 82%);  $^1\text{H}$  NMR (400 MHz,  $\text{DMSO-}d_6$ , 110  $^\circ\text{C}$ ):  $\delta$  = 0.87 (t,  $J$  = 7.2 Hz, 3H), 1.06 (t,  $J$  = 7.2 Hz, 3H), 1.20 (t,  $J$  = 7.2 Hz, 3H), 1.27 (s, 6H), 1.59 (tq,  $J$  = 7.2, 7.6 Hz, 2H), 3.08 (t,  $J$  = 7.6 Hz, 2H), 3.91 (q,  $J$  = 7.2 Hz, 2H), 4.12 (q,  $J$  = 7.2 Hz, 2H), 7.02 (dd,  $J$  = 3.2, 4.8 Hz, 1H), 7.06 (d,  $J$  = 3.2 Hz, 1H), 7.60 (d,  $J$  = 4.8 Hz, 1H), 9.00 (s, 1H);  $^{13}\text{C}$  NMR (100 MHz,  $\text{DMSO-}d_6$ , 110  $^\circ\text{C}$ ):  $\delta$  = 10.4, 13.6, 13.6, 21.2, 24.7, 40.8, 59.9, 61.1, 61.3, 108.8, 125.6, 128.0, 130.7, 132.6, 151.6, 152.1, 153.0, 154.8; IR (KBr): 3303, 2979, 2935, 2877, 1785, 1729, 1402, 1334, 1233, 1088, 1022, 758, 713; HRMS (ESI):  $[\text{M}+\text{H}]^+$  calcd for  $\text{C}_{19}\text{H}_{28}\text{N}_3\text{O}_6\text{S}^+$ , 426.1693; found,  $m/z$  426.1697.

**Di-tert-butyl (Z)-1-((4,4-dimethyl-2-oxo-3-propyloxazolidin-5-ylidene)(*o*-tolyl)methyl)hydrazine-1,2-dicarboxylate (3fA)**

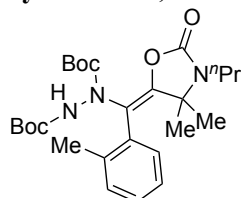

White solid (86.5 mg, 89%); mp 178-179  $^\circ\text{C}$  (decomp.);  $^1\text{H}$  NMR (400 MHz,  $\text{DMSO-}d_6$ , 110  $^\circ\text{C}$ ):  $\delta$  = 0.87 (t,  $J$  = 7.2 Hz, 3H), 1.02 (s, 3H), 1.11-1.25 (m, 12H), 1.46 (s, 9H), 1.52-1.64 (m, 2H), 2.35 (s, 3H), 3.01-3.13 (m, 2H), 7.11-7.24 (m, 3H), 7.25-7.32 (m, 1H), 8.37 (s, 1H);  $^{13}\text{C}$  NMR (100 MHz,  $\text{DMSO-}d_6$ , 110  $^\circ\text{C}$ ):  $\delta$  = 10.4, 19.2, 21.4, 22.9, 25.6, 27.2, 27.3, 40.7, 60.7, 78.4, 79.8, 114.9, 123.9, 128.4, 129.3, 130.8, 133.1, 138.9, 146.6, 151.5, 152.2, 153.8; IR (KBr): 3316, 2979, 2935, 2877, 1786, 1729, 1402, 1334, 1233, 1088, 1022, 758, 713; HRMS (ESI):  $[\text{M}+\text{Na}]^+$  calcd for  $\text{C}_{26}\text{H}_{39}\text{N}_3\text{NaO}_6^+$ , 512.2731; found,  $m/z$  512.2729.

**Diethyl (Z)-1-((4,4-dimethyl-2-oxo-3-propyloxazolidin-5-ylidene)(*o*-tolyl)methyl)hydrazine-1,2-dicarboxylate (3fB)**

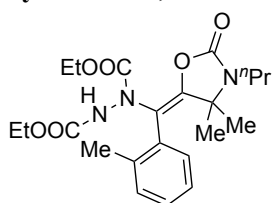

White amorphous (85.5 mg, 99%);  $^1\text{H}$  NMR (400 MHz,  $\text{DMSO-}d_6$ , 110  $^\circ\text{C}$ ):  $\delta$  = 0.87 (t,  $J$  = 7.6 Hz, 3H), 0.98 (t,  $J$  = 7.2 Hz, 3H), 1.03 (s, 3H), 1.19 (s, 3H), 1.22 (t,  $J$  = 7.2 Hz, 3H), 1.51-1.66 (m, 2H), 3.01-3.09 (m, 2H), 3.68-3.90 (m, 2H), 4.15 (q,  $J$  = 7.2 Hz, 2H), 7.12-7.18 (m, 1H), 7.18-7.23 (m, 2H), 7.25-7.31 (m, 1H), 8.88 (s, 1H);  $^{13}\text{C}$  NMR (100 MHz,  $\text{DMSO-}d_6$ , 110  $^\circ\text{C}$ ):  $\delta$  = 10.4, 13.5, 13.6, 19.0, 21.3, 22.9, 25.5, 40.7, 59.8, 60.8, 61.3, 114.4, 124.0, 128.5, 129.3, 130.4, 133.1, 138.9, 147.5, 152.1, 152.9, 154.7; IR (KBr): 3301, 2980, 2936, 2877, 1779, 1726, 1403, 1334, 1233, 1088, 1029, 757; HRMS (ESI):  $[\text{M}+\text{H}]^+$  calcd for  $\text{C}_{22}\text{H}_{32}\text{N}_3\text{O}_6^+$ , 434.2286; found,  $m/z$  434.2281.

**Di-tert-butyl (Z)-1-((4,4-dimethyl-2-oxo-3-propyloxazolidin-5-ylidene)(naphthalen-1-yl)methyl)hydrazine-1,2-dicarboxylate (3gA)**

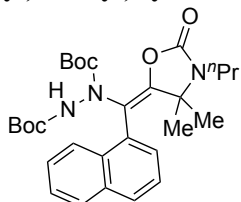

Pale yellow solid (69.1 mg, 66%); mp 182-184 °C (decomp.); <sup>1</sup>H NMR (400 MHz, DMSO-*d*<sub>6</sub>, 150 °C): δ = 0.82 (s, 3H), 0.87 (t, *J* = 7.2 Hz, 3H), 0.97 (s, 9H), 1.19 (s, 3H), 1.45-1.64 (m, 11H), 2.97-3.10 (m, 2H), 7.43-7.55 (m, 4H), 7.83-7.99 (m, 2H), 8.09-8.25 (m, 1H), 8.35 (s, 1H); <sup>13</sup>C NMR (100 MHz, DMSO-*d*<sub>6</sub>, 150 °C): δ = 10.1, 21.1, 23.6, 25.1, 26.8, 27.3, 40.6, 60.7, 78.2, 80.0, 113.6, 123.8, 125.0, 126.1, 127.2, 128.6, 129.1, 130.7, 132.7, 132.9, 148.5, 151.6, 152.0, 153.6; IR (KBr): 3276, 2974, 2934, 2879, 1775, 1718, 1366, 1330, 1161, 1092, 1020, 785; HRMS (ESI): [M+Na]<sup>+</sup> calcd for C<sub>29</sub>H<sub>39</sub>N<sub>3</sub>NaO<sub>6</sub><sup>+</sup>, 548.2731; found, *m/z* 548.2737.

**Diethyl (Z)-1-((4,4-dimethyl-2-oxo-3-propyloxazolidin-5-ylidene)(naphthalen-1-yl)methyl)hydrazine-1,2-dicarboxylate (3gB)**

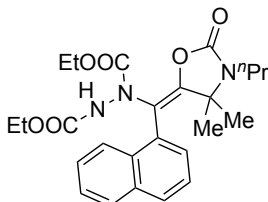

Pale yellow amorphous (89.7 mg, 96%); <sup>1</sup>H NMR (400 MHz, DMSO-*d*<sub>6</sub>, 150 °C): δ = 0.69-0.92 (m, 9H), 1.19 (s, 3H), 1.25-1.36 (m, 3H), 1.52-1.65 (m, 2H), 2.96-3.11 (m, 2H), 3.53-3.74 (m, 2H), 4.12-4.29 (m, 2H), 7.41-7.56 (m, 4H), 7.85-7.99 (m, 2H), 8.24-8.33 (m, 1H), 8.71 (s, 1H); <sup>13</sup>C NMR (100 MHz, DMSO-*d*<sub>6</sub>, 150 °C): δ = 10.1, 12.9, 13.4, 21.0, 23.6, 25.1, 40.7, 59.4, 60.8, 61.2, 113.1, 123.8, 125.0, 125.2, 125.8, 127.2, 128.8, 130.7, 132.7, 132.9, 149.3, 151.9, 153.0, 154.5; IR (KBr): 2977, 2933, 2876, 1781, 1726, 1403, 1374, 1338, 1216, 1096, 786; HRMS (ESI): [M+H]<sup>+</sup> calcd for C<sub>25</sub>H<sub>32</sub>N<sub>3</sub>O<sub>6</sub><sup>+</sup>, 470.2286; found, *m/z* 470.2293.

**Di-tert-butyl (Z)-1-((3-benzyl-4,4-dimethyl-2-oxooxazolidin-5-ylidene)(phenyl)methyl)hydrazine-1,2-dicarboxylate (3hA)**

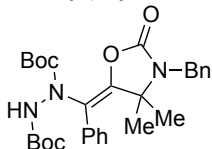

White solid (83.4 mg, 80%); mp 189-190 °C; <sup>1</sup>H NMR (400 MHz, DMSO-*d*<sub>6</sub>, 110 °C): δ = 1.09 (s, 6H), 1.21 (s, 9H), 1.46 (s, 9H), 4.39 (s, 2H), 7.19-7.43 (m, 10H), 8.45 (s, 1H); <sup>13</sup>C NMR (100 MHz, DMSO-*d*<sub>6</sub>, 110 °C): δ = 25.1, 27.3, 27.4, 42.4, 61.0, 78.6, 79.9, 116.4, 126.7, 126.8, 127.0, 127.1, 127.4, 127.7, 128.0, 130.9, 132.2, 137.5, 147.8, 151.8, 152.7, 153.8; IR (KBr): 3326, 2979, 2936, 1775, 1719, 1364, 1153, 1060, 710; HRMS (ESI): [M+Na]<sup>+</sup> calcd for C<sub>29</sub>H<sub>37</sub>N<sub>3</sub>NaO<sub>6</sub><sup>+</sup>, 546.2575; found, *m/z* 546.2584.

**Diethyl (Z)-1-((3-benzyl-4,4-dimethyl-2-oxooxazolidin-5-ylidene)(phenyl)methyl)hydrazine-1,2-dicarboxylate (3hB)**

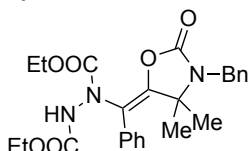

White amorphous (93.6 mg, quant); <sup>1</sup>H NMR (400 MHz, DMSO-*d*<sub>6</sub>, 110 °C): δ = 1.02 (t, *J* = 6.8 Hz, 3H), 1.10 (s, 6H), 1.21 (t, *J* = 7.2 Hz, 3H), 3.86 (q, *J* = 6.8 Hz, 2H), 4.15 (q, *J* = 7.2 Hz, 2H), 4.39 (s, 2H), 7.19-7.49 (m, 10H), 8.98 (s, 1H); <sup>13</sup>C NMR (100 MHz, DMSO-*d*<sub>6</sub>, 110 °C): δ = 13.5, 13.6, 25.1, 42.4, 59.9, 61.1, 61.3, 116.0, 126.7, 126.8, 127.1, 127.8, 128.2,

130.9, 131.9, 137.4, 148.7, 152.5, 153.2, 154.8; IR (KBr): 2982, 2926, 2854, 1781, 1727, 1401, 1336, 1234, 1057, 756, 711; HRMS (ESI):  $[M+H]^+$  calcd for  $C_{25}H_{30}N_3O_6^+$ , 468.2129; found,  $m/z$  468.2116.

**Di-tert-butyl (Z)-1-((3-(4-methoxybenzyl)-4,4-dimethyl-2-oxooxazolidin-5-ylidene)(phenyl)methyl)hydrazine-1,2-dicarboxylate (3iA)**

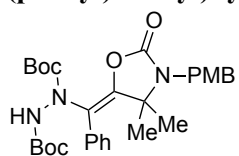

White amorphous (67.2 mg, 61%);  $^1H$  NMR (400 MHz,  $DMSO-d_6$ , 110 °C):  $\delta$  = 1.08 (s, 6H), 1.20 (s, 9H), 1.45 (s, 9H), 3.74 (s, 3H), 4.32 (s, 2H), 6.86 (d,  $J$  = 8.4 Hz, 2H), 7.24 (d,  $J$  = 8.4 Hz, 2H), 7.29-7.40 (m, 5H), 8.43 (s, 1H);  $^{13}C$  NMR (100 MHz,  $DMSO-d_6$ , 110 °C):  $\delta$  = 25.2, 27.2, 27.4, 30.3, 41.9, 54.7, 61.0, 78.6, 79.8, 113.5, 116.3, 127.0, 128.0, 128.3, 129.5, 130.9, 132.2, 147.9, 151.8, 152.6, 153.8, 158.3; IR (KBr): 2978, 2933, 1779, 1725, 1368, 1248, 1156, 1060, 961, 779, 707; HRMS (ESI):  $[M+Na]^+$  calcd for  $C_{30}H_{39}N_3NaO_7^+$ , 576.2680; found,  $m/z$  576.2688.

**Diethyl (Z)-1-((3-(4-methoxybenzyl)-4,4-dimethyl-2-oxooxazolidin-5-ylidene)(phenyl)methyl)hydrazine-1,2-dicarboxylate (3iB)**

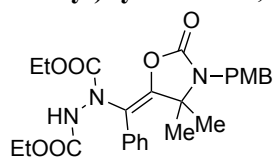

White amorphous (98.2 mg, 99%);  $^1H$  NMR (400 MHz,  $DMSO-d_6$ , 110 °C):  $\delta$  = 1.01 (t,  $J$  = 7.2 Hz, 3H), 1.10 (s, 6H), 1.20 (t,  $J$  = 7.2 Hz, 3H), 3.74 (s, 3H), 3.86 (q,  $J$  = 7.2 Hz, 2H), 4.16 (q,  $J$  = 7.2 Hz, 2H), 4.32 (s, 2H), 6.87 (d,  $J$  = 8.4 Hz, 2H), 7.24 (d,  $J$  = 8.4 Hz, 2H), 7.30-7.41 (m, 5H), 8.97 (s, 1H);  $^{13}C$  NMR (100 MHz,  $DMSO-d_6$ , 110 °C):  $\delta$  = 13.5, 13.6, 25.1, 41.9, 54.7, 59.9, 61.1, 61.3, 113.6, 115.9, 127.1, 128.2, 128.3, 129.4, 130.9, 131.9, 148.7, 152.5, 153.2, 154.8, 158.4; IR (KBr): 2986, 2937, 1780, 1726, 1400, 1332, 1246, 1178, 1059, 962, 780, 710; HRMS (ESI):  $[M+Na]^+$  calcd for  $C_{26}H_{31}N_3NaO_7^+$ , 520.2054; found,  $m/z$  520.2061.

**Di-tert-butyl (Z)-1-((4,4-diethyl-2-oxo-3-propyloxazolidin-5-ylidene)(phenyl)methyl)hydrazine-1,2-dicarboxylate (3jA)**

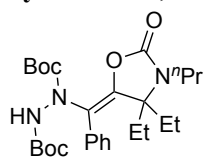

White solid (72.9 mg, 72%); mp 170-171 °C (decomp.);  $^1H$  NMR (400 MHz,  $DMSO-d_6$ , 110 °C):  $\delta$  = 0.80-0.94 (m, 9H), 1.01-1.14 (m, 2H), 1.21 (s, 9H), 1.40-1.66 (m, 13H), 2.96 (t,  $J$  = 8.0 Hz, 2H), 7.27-7.43 (m, 5H), 8.50 (s, 1H);  $^{13}C$  NMR (100 MHz,  $DMSO-d_6$ , 110 °C):  $\delta$  = 6.9, 10.7, 20.9, 27.2, 27.5, 28.6, 40.7, 69.1, 78.4, 80.0, 115.9, 126.9, 128.0, 129.8, 132.3, 144.4, 152.0, 153.3, 153.8; IR (KBr): 3307, 2973, 2935, 2881, 1774, 1717, 1445, 1366, 1159, 1095, 1022, 960, 758, 726, 712 ; HRMS (ESI):  $[M+Na]^+$  calcd for  $C_{27}H_{41}N_3NaO_6^+$ , 526.2888; found,  $m/z$  526.2880.

**Diethyl (Z)-1-((3-benzyl-4,4-dimethyl-2-oxooxazolidin-5-ylidene)(phenyl)methyl)hydrazine-1,2-dicarboxylate (3hB)**

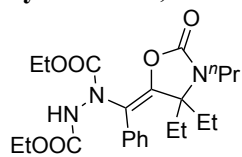

White amorphous (88.1 mg, 98%);  $^1\text{H}$  NMR (400 MHz,  $\text{CD}_3\text{CN}$ , 75  $^\circ\text{C}$ ):  $\delta$  = 0.85-0.97 (m, 9H), 1.09 (t,  $J$  = 7.2 Hz, 3H), 1.12-1.21 (m, 2H), 1.25 (t,  $J$  = 7.2 Hz, 3H), 1.46-1.57 (m, 2H), 1.59-1.71 (m, 2H), 2.98 (t,  $J$  = 7.6 Hz, 2H), 3.95 (q,  $J$  = 6.8 Hz, 2H), 4.20 (q,  $J$  = 7.2 Hz, 2H), 7.27-7.49 (m, 5H);  $^{13}\text{C}$  NMR (100 MHz,  $\text{DMSO-}d_6$ , 110  $^\circ\text{C}$ ):  $\delta$  = 6.7, 10.7, 13.5, 13.7, 20.9, 28.6, 40.7, 59.8, 61.3, 69.3, 115.5, 127.1, 128.2, 129.8, 131.9, 145.4, 153.2, 153.3, 154.8; IR (KBr): 3267, 2973, 2936, 1778, 1726, 1406, 1343, 1184, 1095, 1059, 954, 758, 713; HRMS (ESI):  $[\text{M}+\text{H}]^+$  calcd for  $\text{C}_{23}\text{H}_{34}\text{N}_3\text{O}_6^+$ , 448.2442; found,  $m/z$  448.2441.

## 2.4 Procedure for the Control Experiment using DPPH

The procedure using DPPH was described below. In a 30 mL Schlenk flask, molecular sieves 3A (200 mg) was added, and the equipment with MS 3A was heated under reduced pressure. After cooled to room temperature, the flask was purged with  $\text{N}_2$ , then  $\text{AgOAc}$  (1.7 mg, 0.010 mol), propargylamine **1a** (40.3 mg, 0.200 mmol),  $\text{CH}_3\text{CN}$  (2 mL), and DBU (30  $\mu\text{L}$ , 0.20 mmol) were added sequentially, and the mixture was degassed by three freeze-pump-thaw cycles. After the mixture was cooled to  $-40$   $^\circ\text{C}$  for 10 min, the solution of DPPH (1.9 mL, 0.48 mmol, 0.25 M solution in  $\text{CH}_3\text{CN}$ ) was added dropwise, and then  $\text{CO}_2$  (balloon) was charged. The temperature was kept at  $-40$   $^\circ\text{C}$  until the reaction was completed. After 24 h, the reaction mixture was diluted by EtOAc and filtered through a short pad of silica gel (eluent: EtOAc). AcOH (1 mL) was added to the filtrate and stirred for 12 h. The reaction mixture was then extracted by EtOAc and organic layer was washed by saturated  $\text{NaHCO}_3$  aq.. After the solvent was evaporated under reduced pressure, and the residue was purified by column chromatography ( $\text{SiO}_2$ , eluent: *n*-hexane: $\text{Et}_2\text{O}$  = 4:1 to 2:1) and preparative thin layer chromatography ( $\text{SiO}_2$ , eluent: *n*-hexane:EtOAc = 3:1) to afford the desired product **3aB** (10.4 mg, 8%).

**(Z)-5-((2,2-Diphenyl-1-(2,4,6-trinitrophenyl)hydrazineyl)(4-methoxyphenyl)methylene)-4,4-dimethyl-3-propyloxazolidin-2-one (4b)**

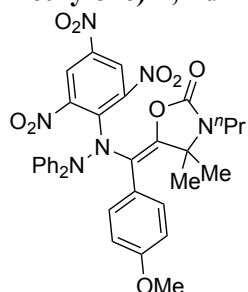

Dark purple amorphous (10.4 mg, 8%);  $^1\text{H}$  NMR (400 MHz,  $\text{DMSO-}d_6$ ):  $\delta$  = 0.79-0.91 (m, 3H), 0.98-1.09 (m, 3H), 1.48-1.70 (m, 5H), 3.02-3.20 (m, 2H), 3.82-3.86 (m, 3H), 7.01-7.14 (m, 6H), 7.16 (d,  $J$  = 1.6 Hz, 1H), 7.25-7.36 (m, 2H), 7.38-7.50 (m, 4H), 7.81 (d,  $J$  = 1.6 Hz, 1H), 7.98 (d,  $J$  = 9.2 Hz, 2H);  $^{13}\text{C}$  NMR (100 MHz,  $\text{DMSO-}d_6$ ):  $\delta$  = 11.1, 19.6, 22.1, 22.9, 41.5, 55.7, 64.4, 108.0, 108.2, 108.3, 114.2, 114.3, 122.8, 123.5, 125.2, 127.4, 130.0, 130.1, 132.4, 132.5, 143.3, 143.7, 149.6, 153.5, 154.2, 163.6; IR (KBr): 2930, 2857, 1775, 1600, 1537, 1467, 1385, 1264, 1229, 1165, 1113, 1040, 969, 900, 757, 689; HRMS (ESI):  $[\text{M}+\text{H}]^+$  calcd for  $\text{C}_{34}\text{H}_{33}\text{N}_6\text{O}_9^+$ , 669.2304; found,  $m/z$  669.2296.

## 2.5 Transformation of Aminovinyloxazolidinone

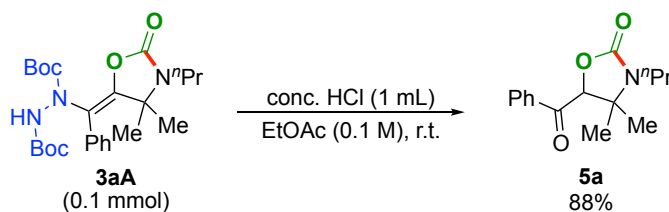

### Hydrolysis of aminovinyloxazolidinone

**3aA** (47.6 mg, 0.100 mmol) was dissolved in EtOAc (1 mL) at room temperature. To the solution conc. HCl (1 mL) was added at 0 °C, the mixture was warmed to room temperature and was stirred for 5 min at the same temperature. After the reaction was completed, NaOH was added at 0 °C to neutralize the reaction. The reaction mixture was extracted three times with EtOAc and the combined organic layer was dried over  $\text{Na}_2\text{SO}_4$ . After the solvent was removed, the residue was purified by column chromatography ( $\text{SiO}_2$ , eluent:  $n$ -hexane:EtOAc=3:1) to afford **5a** (23.0 mg, 0.0880 mmol) in 88% yield.

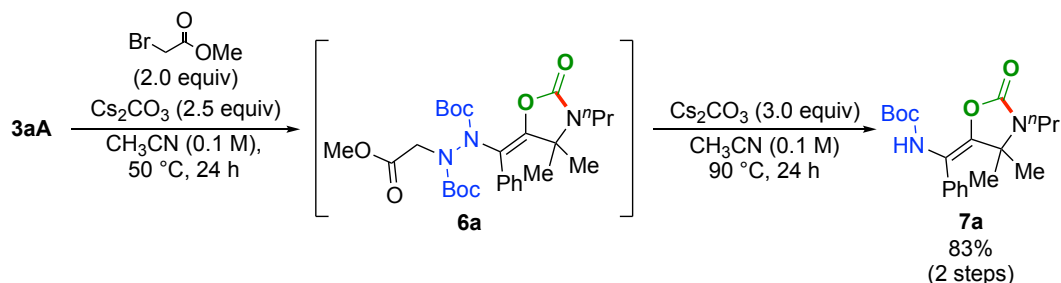

### N-N bond cleavage<sup>7</sup>

Methyl bromoacetate (19.0  $\mu\text{L}$ , 0.200 mmol) and  $\text{Cs}_2\text{CO}_3$  (81.4 mg, 0.250 mmol) were added to acetonitrile (1 mL) solution of **3aA** (47.6 mg, 0.100 mmol) at room temperature. The mixture was warmed to  $50\text{ }^\circ\text{C}$  and stirred at the same temperature for 24 h. After the reaction was completed, saturated  $\text{NH}_4\text{Cl}$  (aq) was added to quench the reaction. The solution was then extracted with EtOAc. The extract was washed with brine, dried over anhydrous  $\text{Na}_2\text{SO}_4$ , and the solvent was removed in vacuo. The crude was directly used for the next step without further purification.

The crude was dissolved in  $\text{CH}_3\text{CN}$  (1 mL) and  $\text{Cs}_2\text{CO}_3$  (97.7 mg, 0.300 mmol) was added to the solution at room temperature. Then, the solution was warmed to  $90\text{ }^\circ\text{C}$  and stirred at the same temperature for 24 h. After filtration through a short-plug of silica gel (ca. 10 g, EtOAc was used as eluent), volatile materials were removed under reduced pressure and the residue was purified by preparative thin layer chromatography (three times, *n*-hexane:EtOAc = 3:1) to afford **7a** (29.9 mg, 0.0830 mmol) in 83% yield.

### 5-benzoyl-4,4-dimethyl-3-propyloxazolidin-2-one (**5a**)

Colorless liquid (23.0 mg, 88%);  $^1\text{H}$  NMR (400 MHz,  $\text{CD}_3\text{CN}$ ):  $\delta$  = 0.87 (t,  $J$  = 7.6 Hz, 3H), 0.96 (s, 3H), 1.43 (s, 3H), 1.54 (tq,  $J$  = 7.2, 7.6 Hz, 2H), 3.02 (t,  $J$  = 7.2 Hz, 2H), 5.64 (s, 1H), 7.52-7.58 (m, 2H), 7.66-7.71 (m, 1H), 7.92-7.96 (m, 1H);  $^{13}\text{C}$  NMR (100 MHz,  $\text{CD}_3\text{CN}$ ):  $\delta$  = 11.4, 22.3, 23.4, 26.6, 42.5, 61.9, 82.6, 129.4, 130.0, 135.1, 137.0, 157.4, 195.8; HRMS (ESI):  $[\text{M}+\text{H}]^+$  calcd for  $\text{C}_{15}\text{H}_{20}\text{NO}_3^+$ , 262.1438; found,  $m/z$  262.1440.

### *tert*-butyl (*Z*)-((4,4-dimethyl-2-oxo-3-propyloxazolidin-5-ylidene)(phenyl)methyl) carbamate (**7a**)

White solid (29.9 mg, 83%); mp  $155\text{-}156\text{ }^\circ\text{C}$ ;  $^1\text{H}$  NMR (400 MHz,  $\text{CD}_3\text{CN}$ ,  $70\text{ }^\circ\text{C}$ ):  $\delta$  = 0.95 (t,  $J$  = 7.6 Hz, 3H), 1.36 (s, 9H), 1.57 (s, 6H), 1.69 (tq,  $J$  = 7.6, 8.0 Hz, 2H), 3.15 (t,  $J$  = 8.0 Hz, 2H), 6.50 (bs, 1H), 7.23-7.28 (m, 1H), 7.33-7.39 (m, 2H), 7.52-7.56 (m, 1H);  $^{13}\text{C}$  NMR (100 MHz,  $\text{CD}_3\text{CN}$ ,  $70\text{ }^\circ\text{C}$ ):  $\delta$  = 11.8, 23.5, 25.2, 28.8, 43.0, 64.1, 80.8, 113.3, 128.5, 128.6, 129.2, 138.0, 154.4,

156.4; HRMS (ESI):  $[M+Na]^+$  calcd for  $C_{20}H_{29}N_2O_4^+$ , 361.2122; found, m/z 361.2108.

## References

- 1) E. Tyrrell, L. Whiteman, N. Williams, *Synthesis* **2009**, 5, 829-835.
- 2) K. Sekine, R. Kobayashi, T. Yamada, *Chem. Lett.* **2015**, 44, 1407-1409.
- 3) A. A. Peshkov, V. A. Peshkov, O. P. Pereshivko, E. V. Van der Eycken, *Tetrahedron* **2015**, 71, 3863-3871.
- 4) D. Kuhnt, T. Himmler, H. Ziemann, *Process for the preparation of (hetero)arylalk(en/in)ylamines and (hetero)arylalkinylamines*, DE4102289A1, **1992**.
- 5) J. Ying, Z. Le, X.-F. Wu, *Org. Lett.* **2020**, 22, 194-198.
- 6) a) W.-J. Yoo, C. J. Li, *Adv. Synth. Catal.* **2008**, 350, 1503-1506.  
b) J. Hu, J. Ma, Q. Zhu, Z. Zhang, C. Wu, B. Han, *Angew. Chem. Int. Ed.* **2015**, 54, 5399-5403.
- 7) a) P. Magnus, N. Garizi, K. A. Seibert, A. Ornholt, *Org. Lett.* **2009**, 11, 5646-5648.  
b) Z. Dai, T. K. Green, *J. Org. Chem.* **2014**, 79, 7778-7784.

20200320 sub\_NMe2.als  
 DRILE  
 COMINT  
 DATIM  
 OBNUC  
 EXMOD  
 OBFREQ  
 OBFIN  
 POINT  
 PREQU  
 SCANS  
 ACQTM  
 PD  
 PW1  
 IRNUC  
 CTIMP  
 SLVNT  
 EXREF  
 BF  
 RGAIN  
 20200320 sub\_NMe2.als  
 F1 Mar 20 20:07:33 2020  
 IH  
 NON  
 399.65 MHz  
 124.00 KHz  
 10500.00 Hz  
 16384  
 7992.01 Hz  
 8  
 2.0500 sec  
 2.0000 sec  
 6.60 usec  
 6348.8 c  
 CD3CN  
 1.93 ppm  
 0.12 Hz  
 11

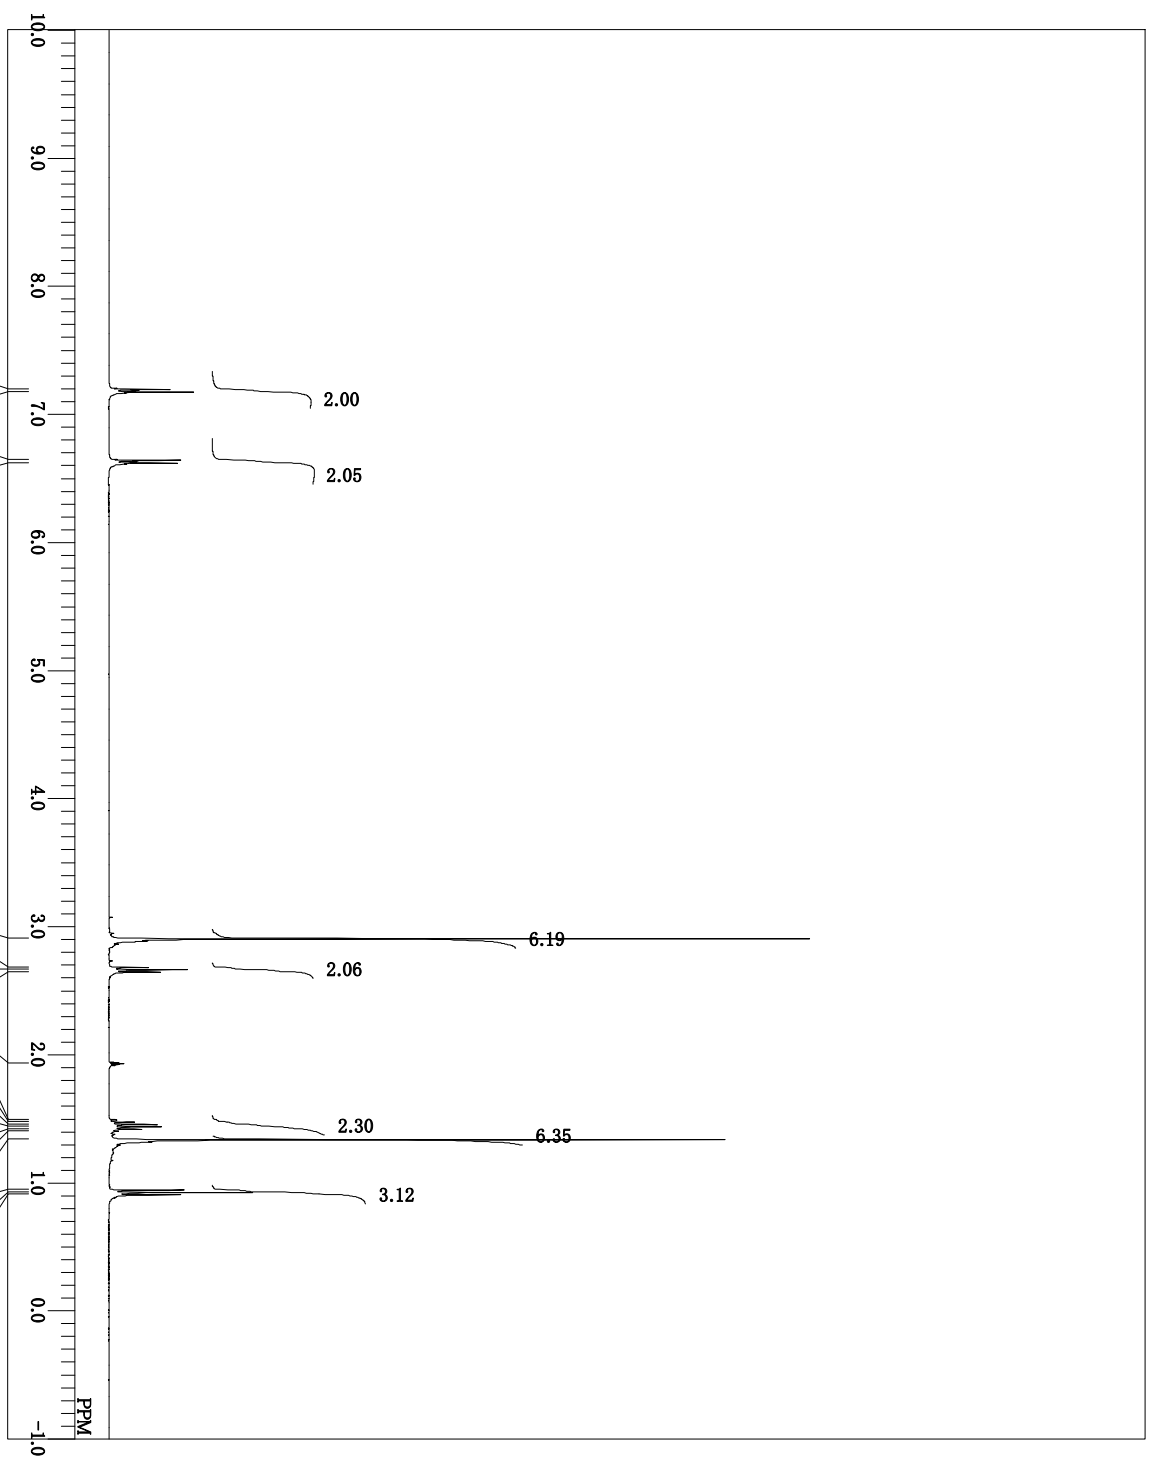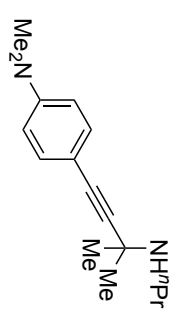

1c



DRFILE 20200320 sub\_NMe2.bcm.als  
 COMINT Ft Mar 20 20:16:30 2020  
 DATIM 13C  
 OBNUC BCM  
 EXMOD 100.40 MHz  
 OPRQ 125.00 KHz  
 OBFIN 10500.00 Hz  
 POINT 32768  
 PREQU 27118.64 Hz  
 SCANS 64  
 ACQTM 1.2083 sec  
 PD 3.0000 sec  
 PW1 4.70 usec  
 IRNUC 1H  
 CTEMP 6348.8 c  
 CD3CN 118.20 ppm  
 SLVNT 0.12 Hz  
 EXREF Z1  
 BF  
 RGAIN

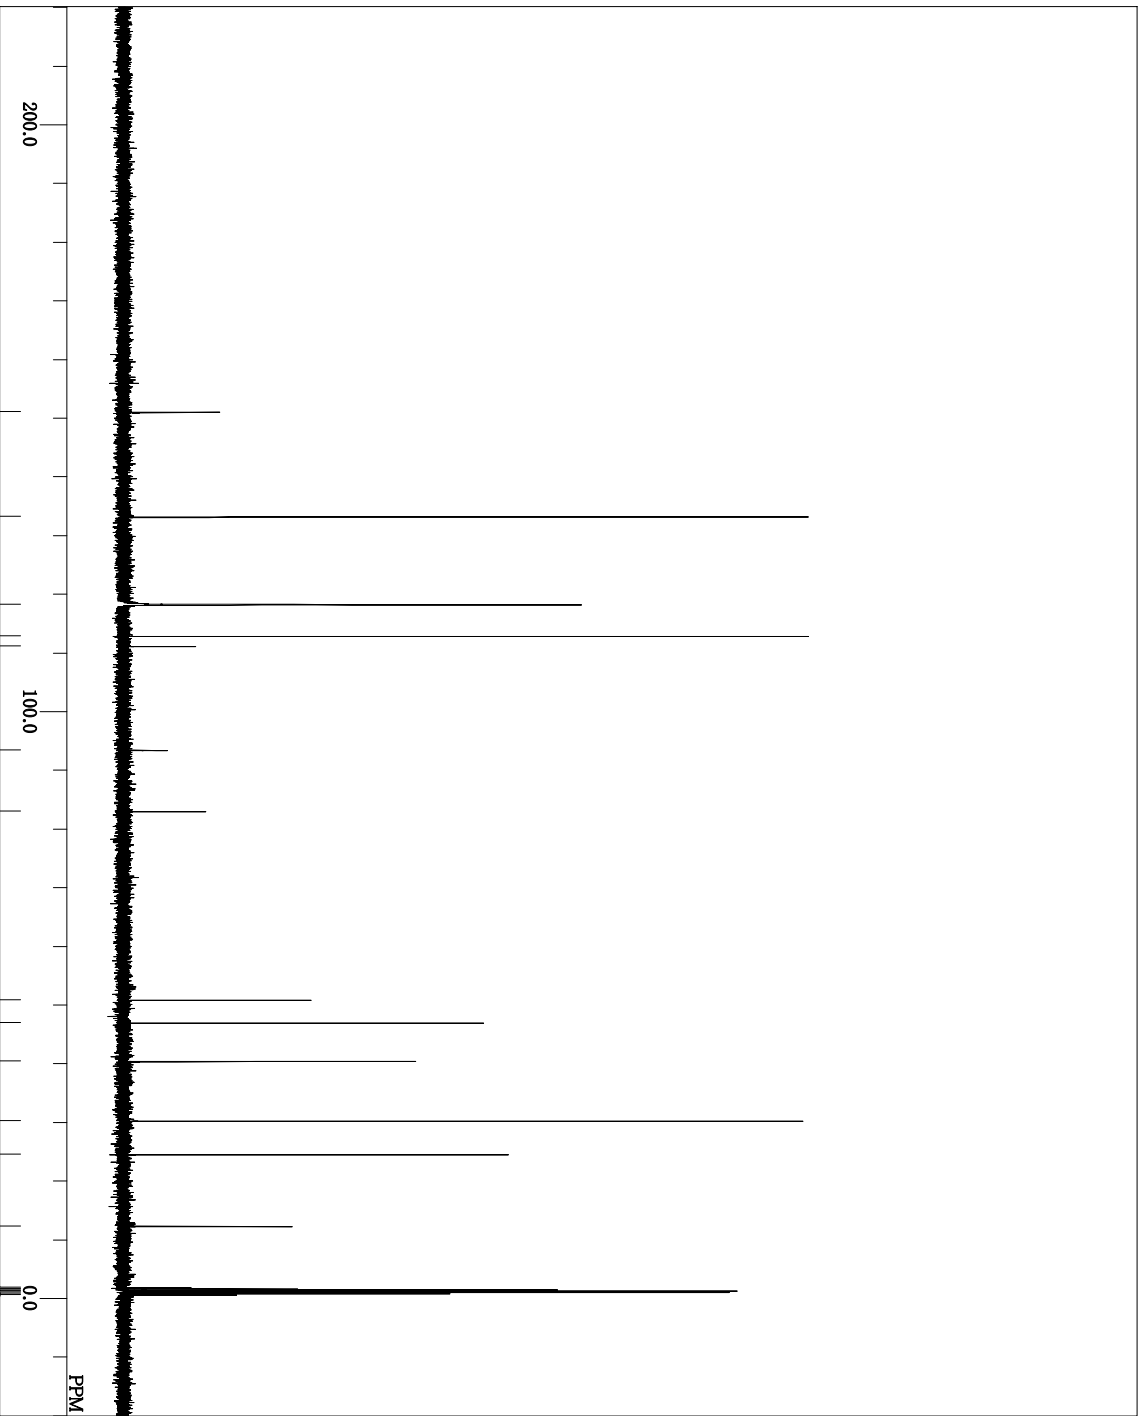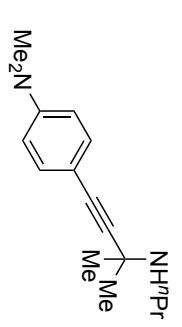

1c

DRILE  
 COMINT  
 DATIM  
 OBNUC  
 EXMOD  
 OBFREQ  
 OBSSET  
 OBFIN  
 POINT  
 FREQU  
 SCANS  
 ACQTM  
 PD  
 PW1  
 IRNUC  
 CTIMP  
 SLVNT  
 EXREF  
 BF  
 RGAIN

20200320 sub\_oTol.als  
 Fri Mar 20 20:46:20 2020  
 1H  
 NON  
 399.65 MHz  
 124.00 KHz  
 10500.00 Hz  
 16384  
 7992.01 Hz  
 8  
 2.0500 sec  
 2.0000 sec  
 6.50 usec  
 1H  
 6348.8 c  
 CD3CN  
 1.93 ppm  
 0.12 Hz  
 9

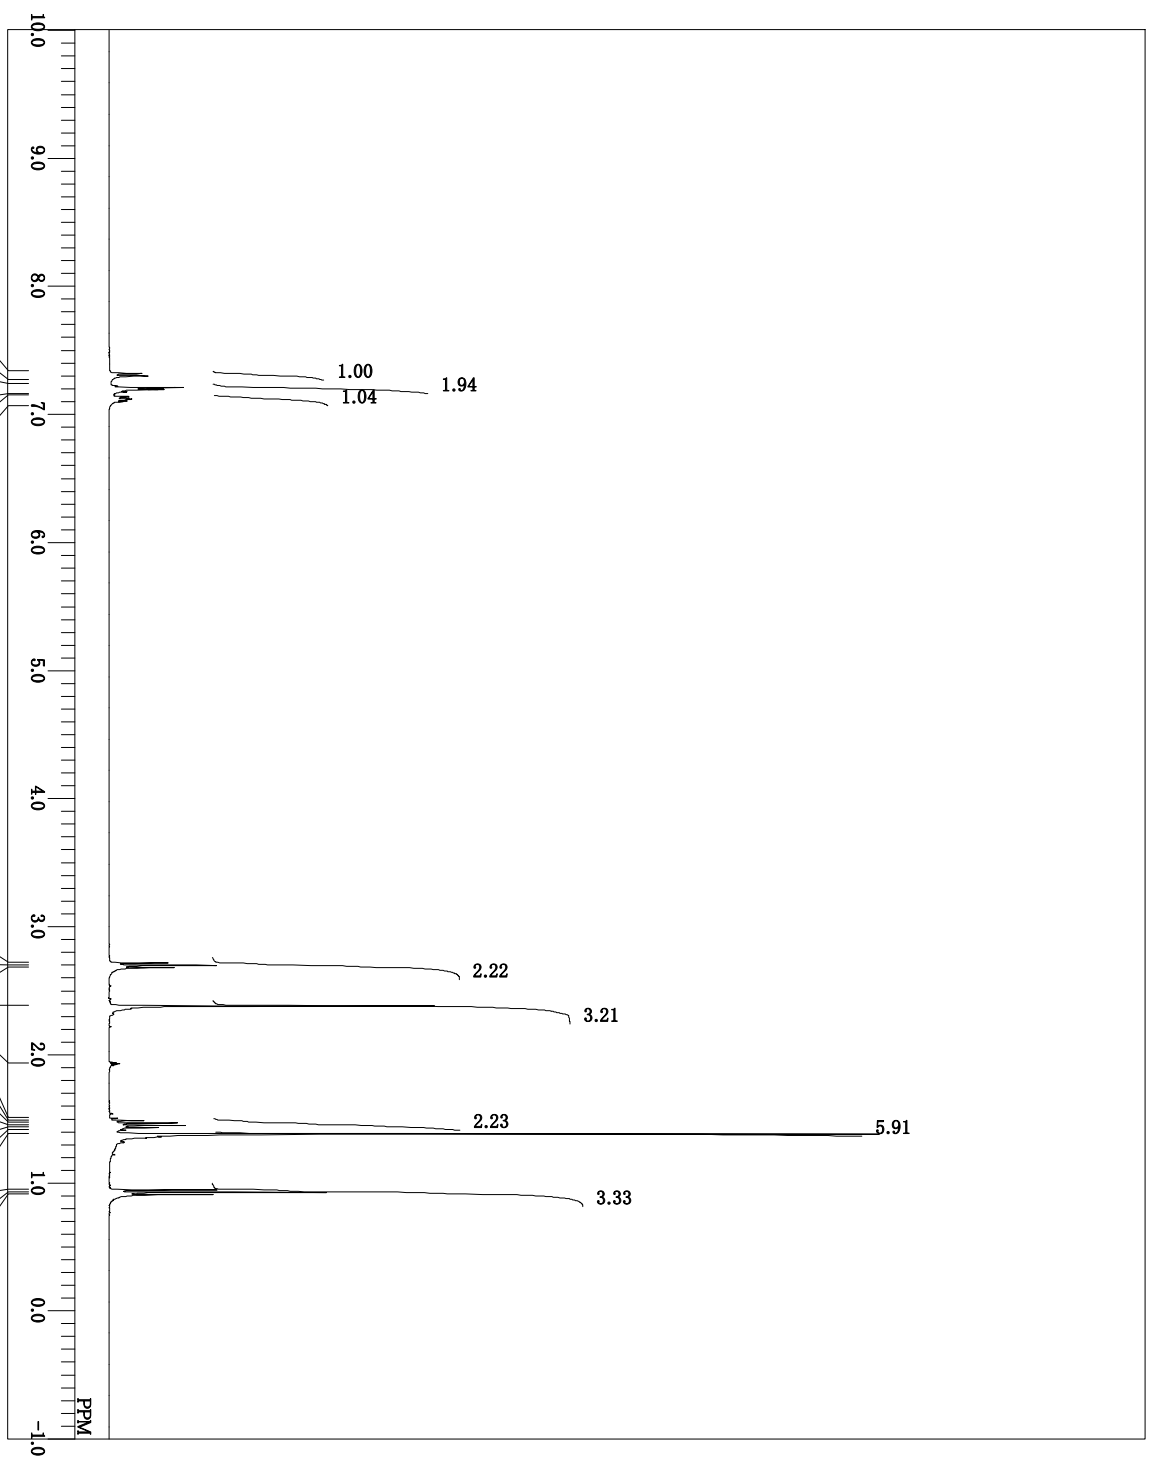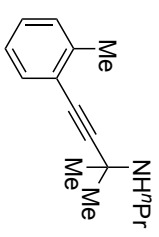

1f

20200320 sub\_oTol\_bom\_als  
 FILE COMINT  
 DATIM Fri Mar 20 20:53:23 2020  
 OBNUC 13C  
 EXMOD BCM  
 OPRQ 100.40 MHz  
 OBSET 125.00 KHz  
 OBFIN 10500.00 Hz  
 POINT 32768  
 PREQU 27118.64 Hz  
 SCANS 32  
 ACQTM 1.2083 sec  
 PD 3.0000 sec  
 PW1 4.70 usec  
 IRNUC 1H  
 CTEMP 6348.8 c  
 CD3CN 118.20 ppm  
 SLVNT EXRER  
 BF 0.12 Hz  
 Z1 Z1  
 RGAIN

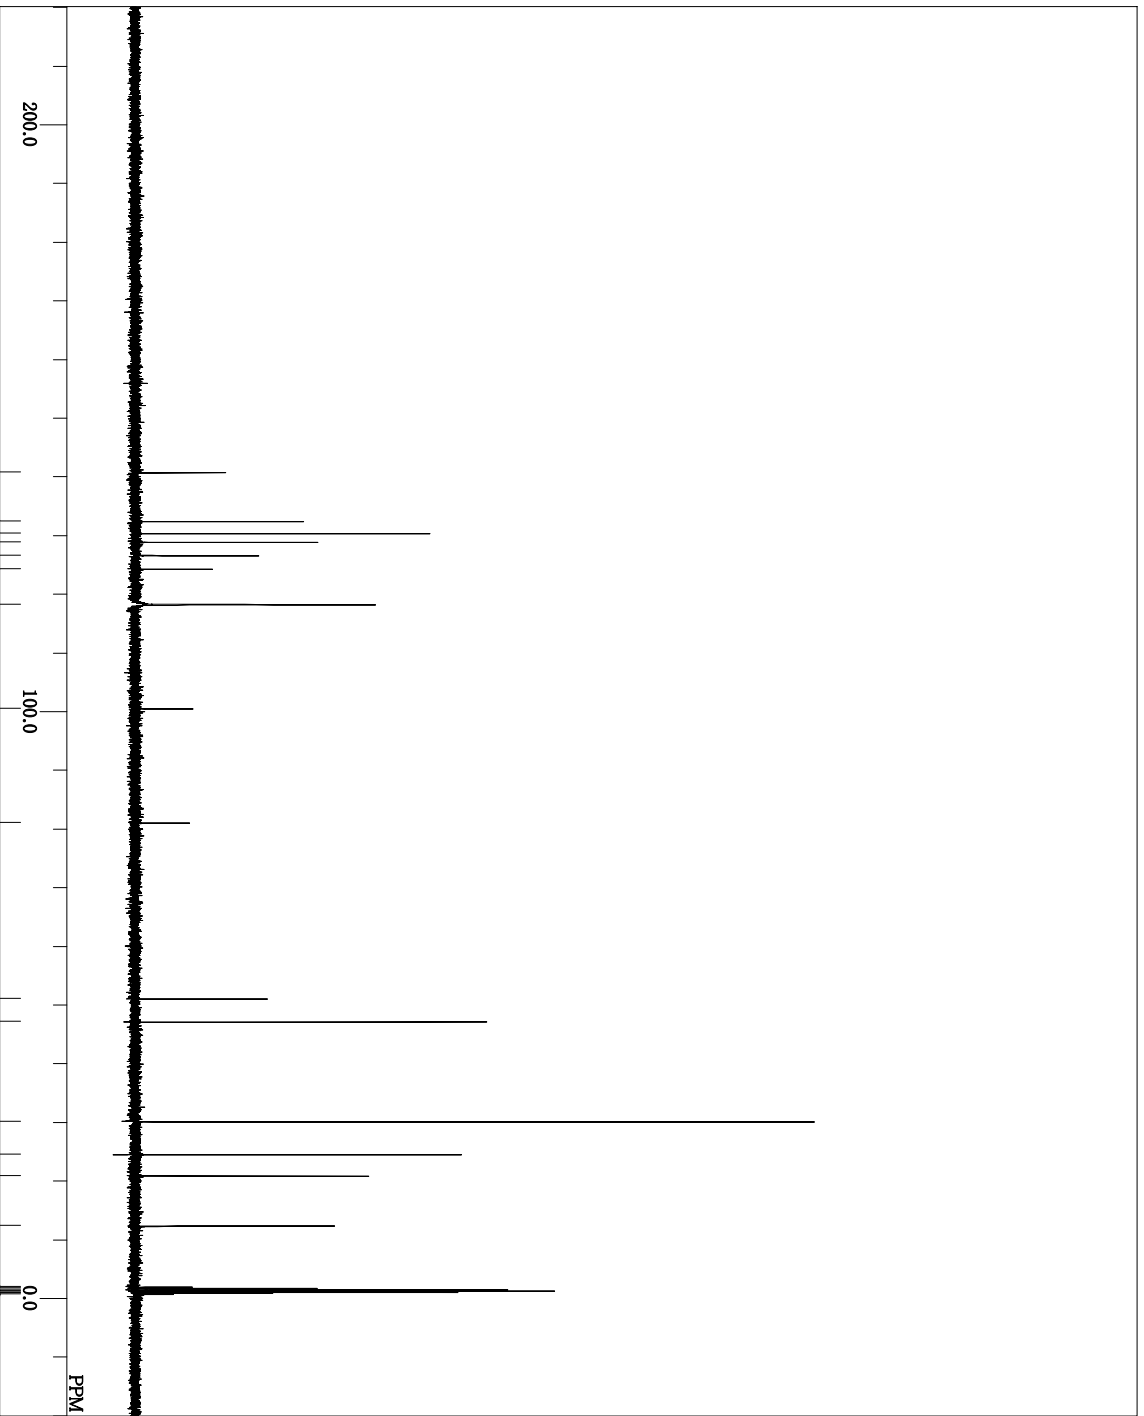

1f

DRILE  
 COMINT  
 DATIM  
 OBNUC  
 EXMOD  
 OBFRO  
 OBFIN  
 POINT  
 FREQU  
 SCANS  
 ACQTM  
 PD  
 PW1  
 IRNUC  
 CTIMP  
 SLVNT  
 EXREF  
 BF  
 RGAIN

20200320 sub\_1naph.als  
 Fri Mar 20 20:59:19 2020  
 IH  
 NON  
 399.65 MHz  
 124.00 KHz  
 10500.00 Hz  
 16384  
 7992.01 Hz  
 8  
 2.0500 sec  
 2.0000 sec  
 6.50 usec  
 IH  
 6348.8 c  
 CD3CN  
 1.93 ppm  
 0.12 Hz  
 10

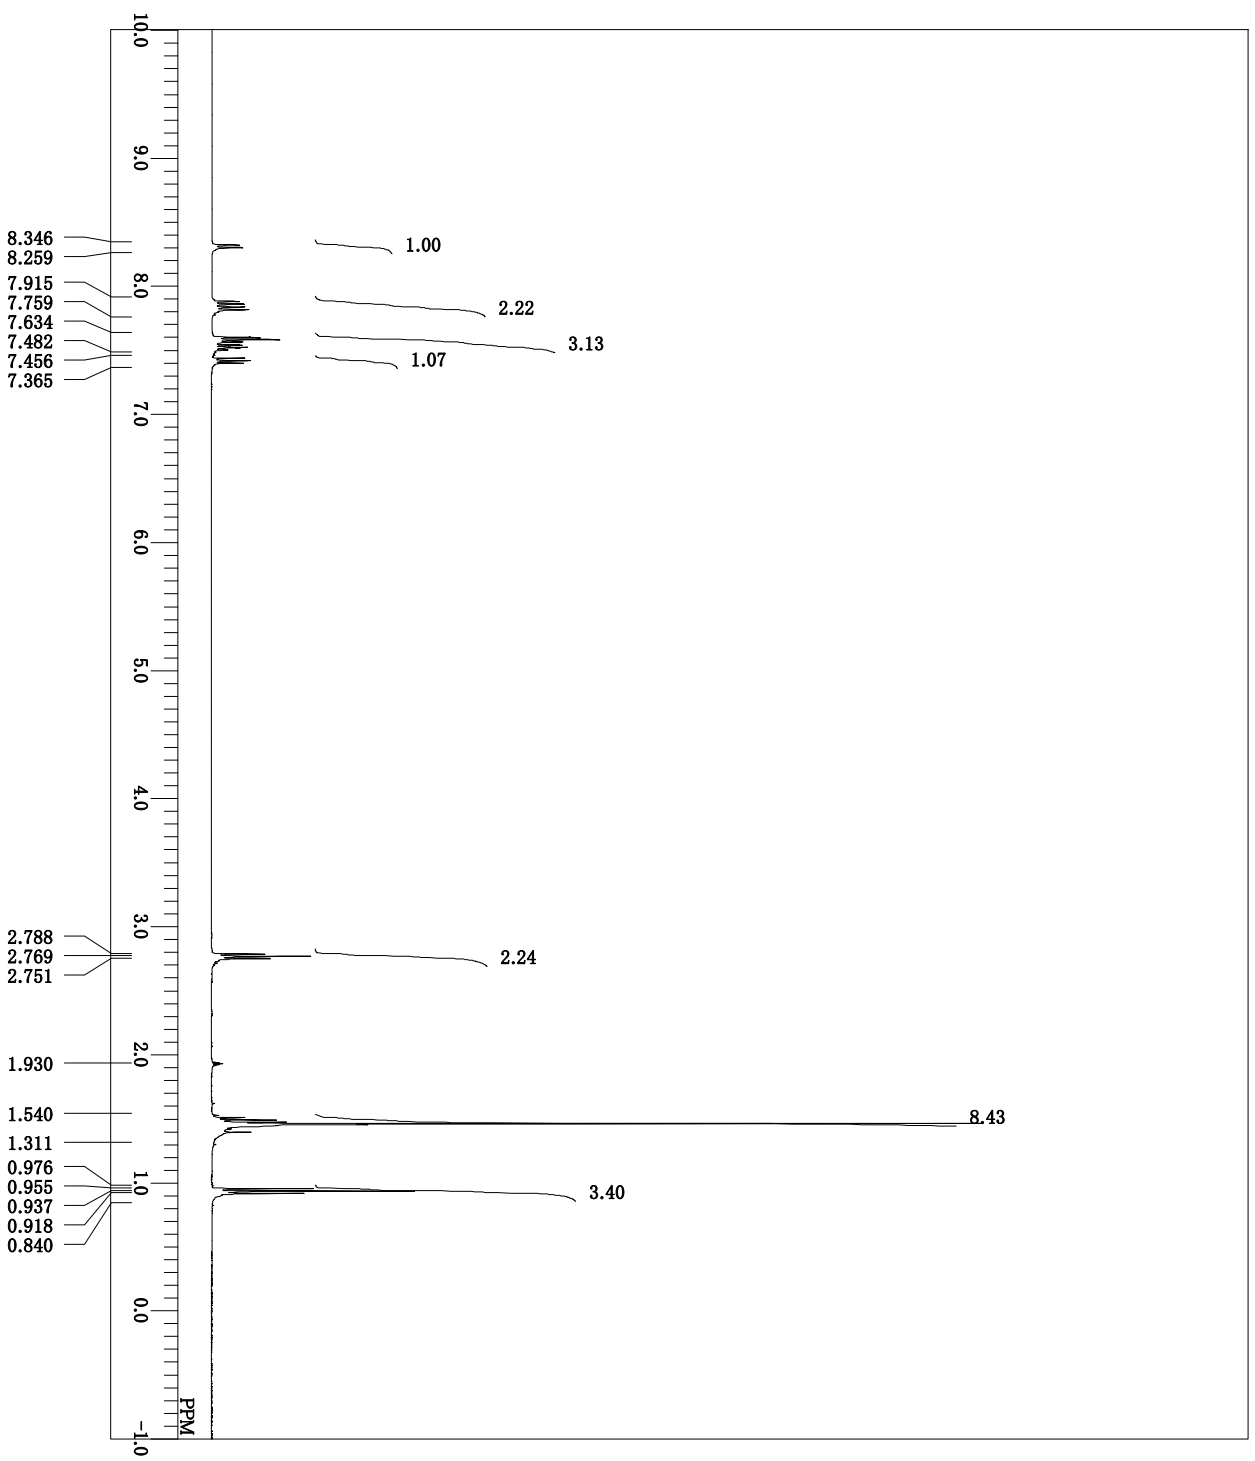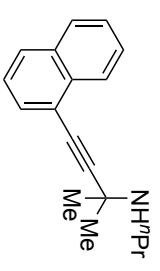

**1g**

20200320 sub\_Inaphl\_bcm.als  
 DRFILE  
 COMINT  
 DATIM  
 OBNUC  
 EXMOD  
 OBFREQ  
 OBFIN  
 POINT  
 PREQU  
 SCANS  
 ACQTM  
 PD  
 PW1  
 IRNUC  
 CTEMP  
 SLVNT  
 EXREF  
 BF  
 RGAIN  
 13C  
 BCM  
 100.40 MHz  
 125.00 KHz  
 10500.00 Hz  
 32768  
 27118.64 Hz  
 32  
 1.2083 sec  
 3.0000 sec  
 4.70 usec  
 6348.8 c  
 CD3CN  
 118.20 ppm  
 0.12 Hz  
 Z1

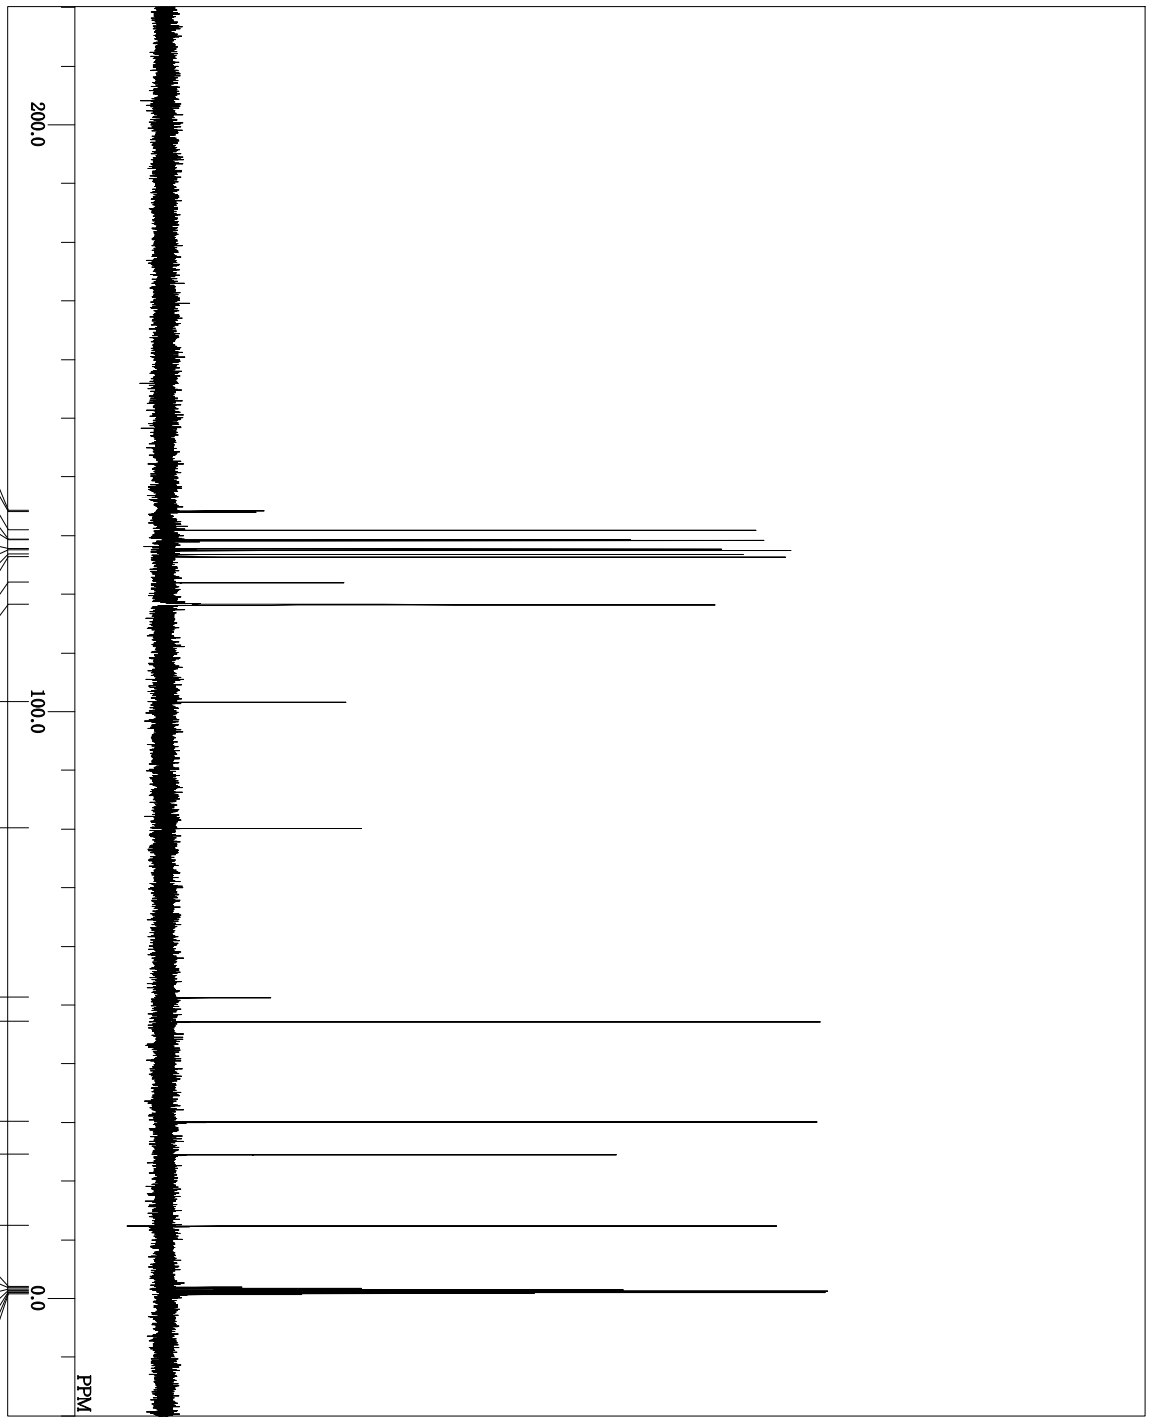

**1g**

DRILE  
 COMINT  
 DATIM  
 OBNUC  
 EXMOD  
 OBRPO  
 OBFIN  
 POINT  
 PREQU  
 SCANS  
 ACQTM  
 PD  
 PW1  
 IRNUC  
 CTIMP  
 SLVNT  
 EXREF  
 BF  
 RGAIN

20200320 sub\_Et2.als  
 Fri Mar 20 20:29:13 2020  
 1H  
 NON  
 399.65 MHz  
 124.00 KHz  
 10500.00 Hz  
 16384  
 7992.01 Hz  
 8  
 2.0500 sec  
 2.0000 sec  
 6.50 usec  
 1H  
 6348.8 c  
 CD3CN  
 1.93 ppm  
 0.12 Hz  
 10

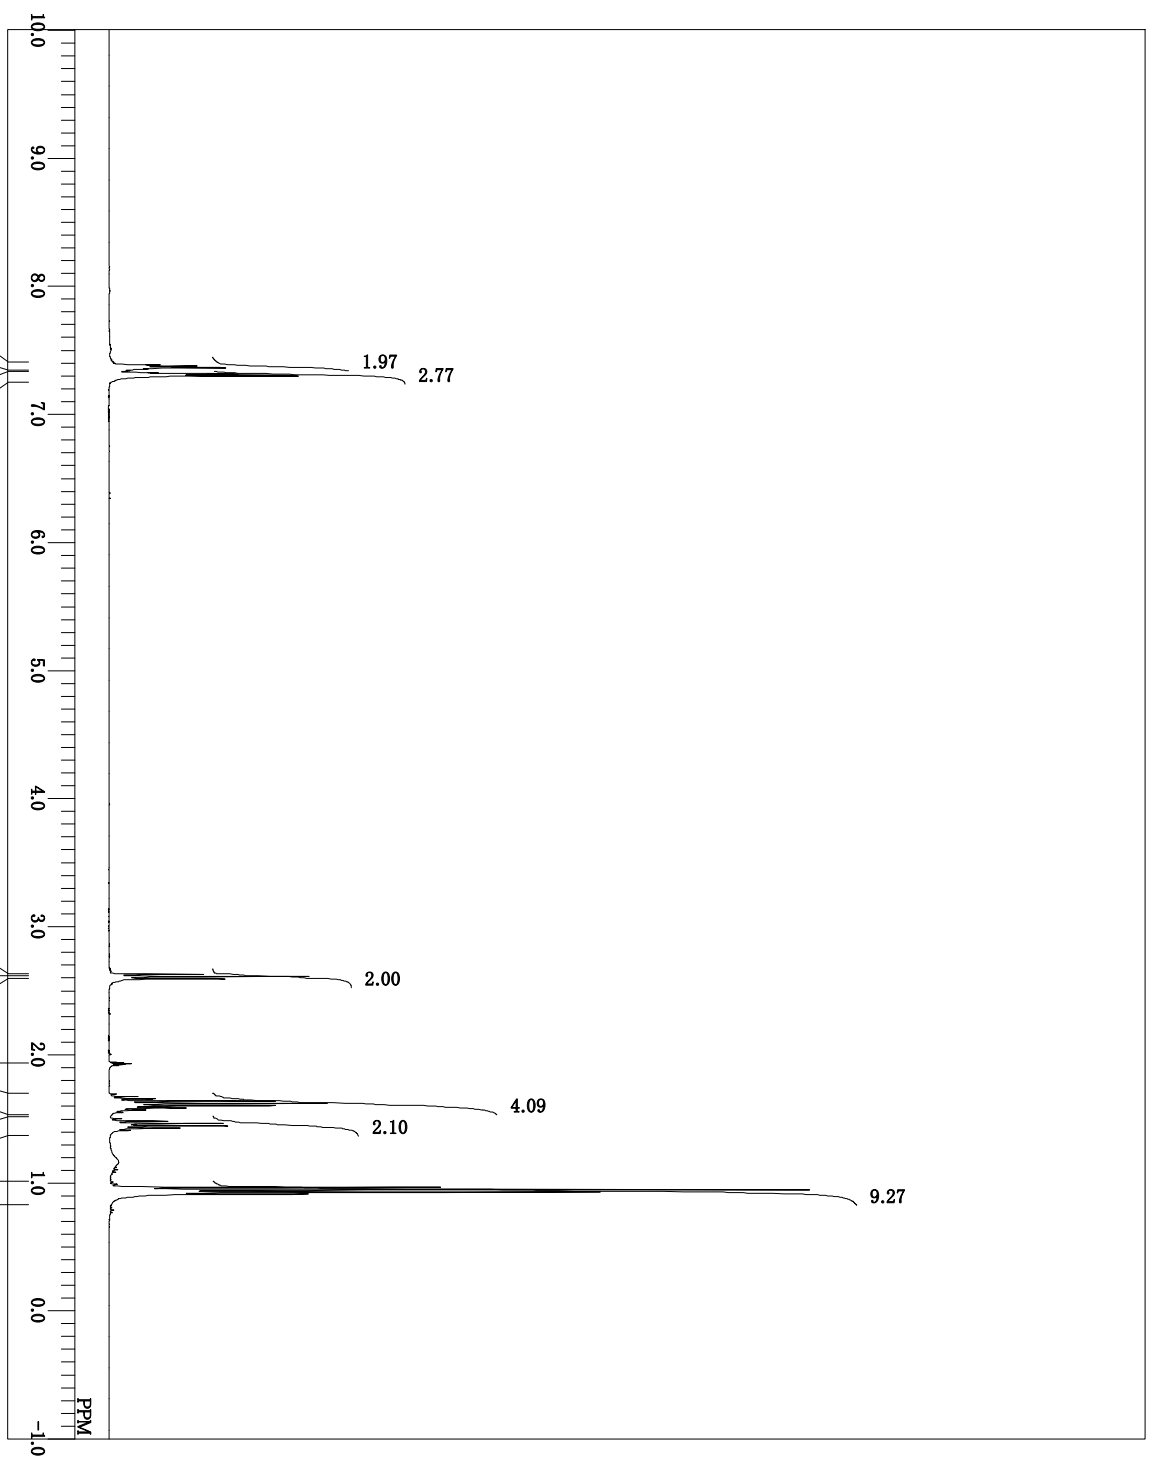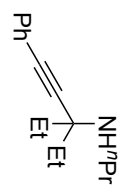

1j

DRILE  
 COMINT  
 DATIM  
 OBNUC  
 EXMOD  
 OBPPO  
 OBPSET  
 OBFIN  
 POINT  
 PREQU  
 SCANS  
 ACQTM  
 PD  
 PW1  
 IRNUC  
 CTIMP  
 SLVNT  
 EXREF  
 BF  
 RGAIN

20200320 sub\_Et2.bcm.als  
 Fri Mar 20 20:36:43 2020  
 13C  
 BCM  
 100.40 MHz  
 125.00 KHz  
 10500.00 Hz  
 32768  
 27118.64 Hz  
 32  
 1.2083 sec  
 3.0000 sec  
 4.70 usec  
 1H  
 6348.8 c  
 CD3CN  
 118.20 ppm  
 0.12 Hz  
 Z1

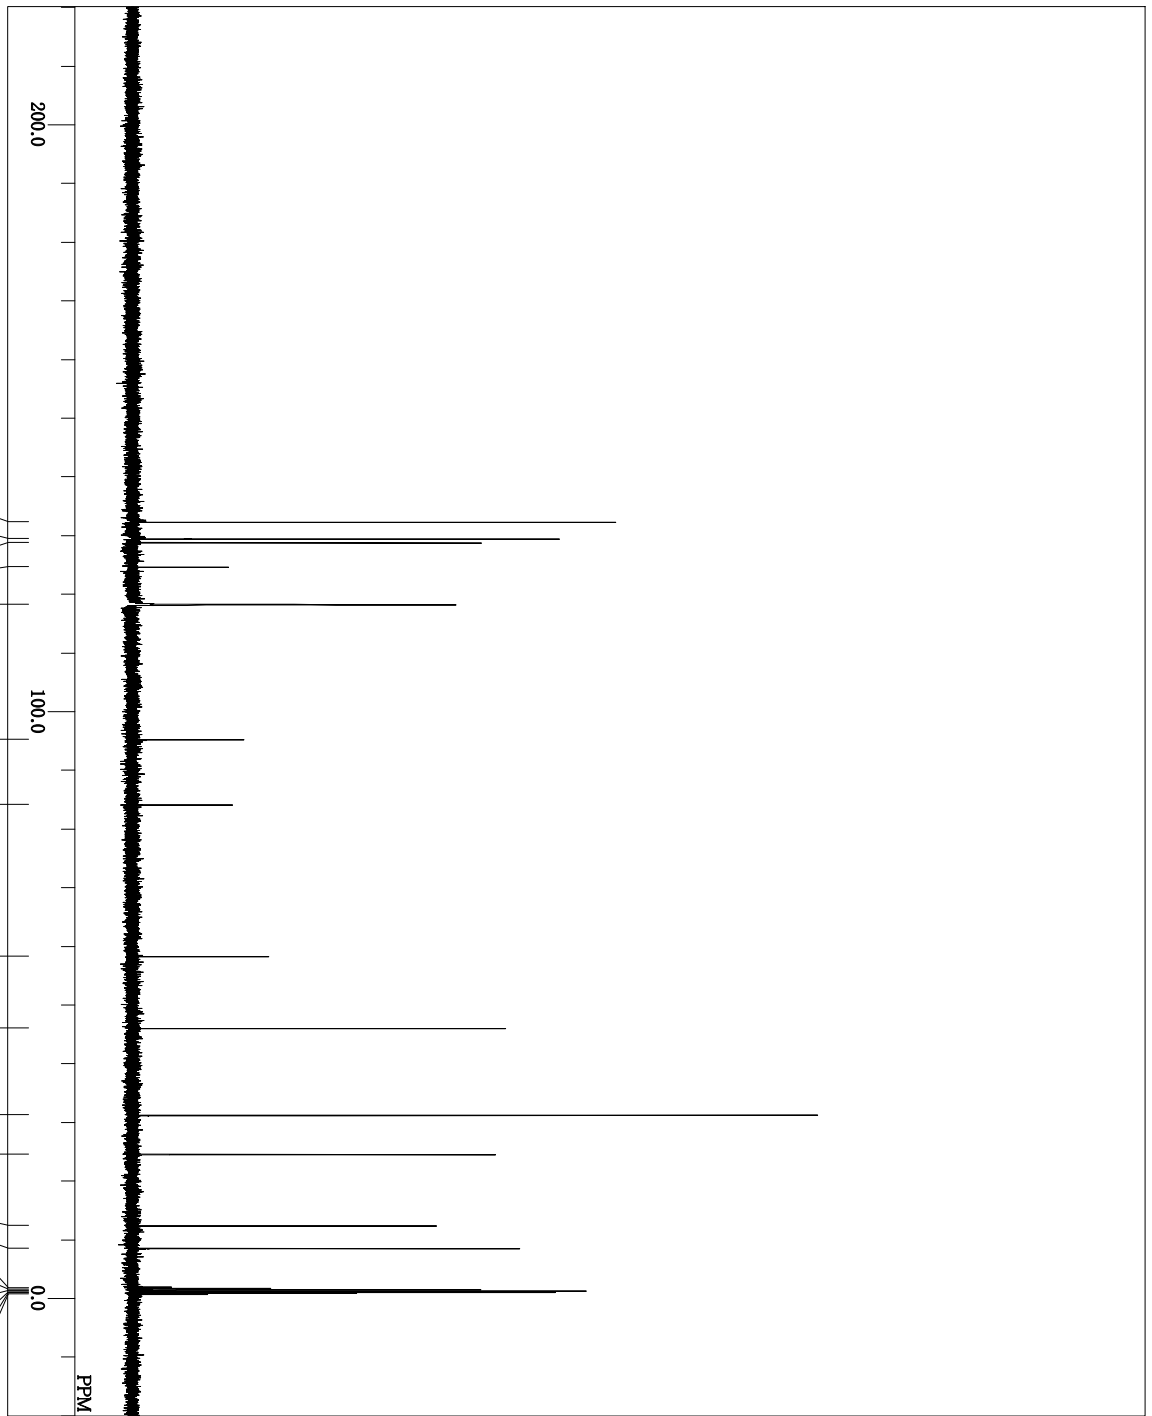

1j

DRILE 20200327 model\_DBAD\_110deg\_Prc  
 COMINT single\_pulse  
 DATIM 2020-03-27 18:23:51  
 OBNUC <sup>1</sup>H  
 EXMOD proton, jnp  
 OFPRQ 395.88 MHz  
 OBSET 6.28 KHz  
 OBFIN 0.87 Hz  
 POINT 16384  
 FREQU 7422.80 Hz  
 SCANS 8  
 ACQTM 2.2073 sec  
 PD 5.0000 sec  
 PW1 3.14 usec  
 IRNUC <sup>1</sup>H  
 CTIMP 110.0 c  
 SLYNT DMSO  
 EXREF 2.49 ppm  
 BF 0.12 Hz  
 RGAIN 30

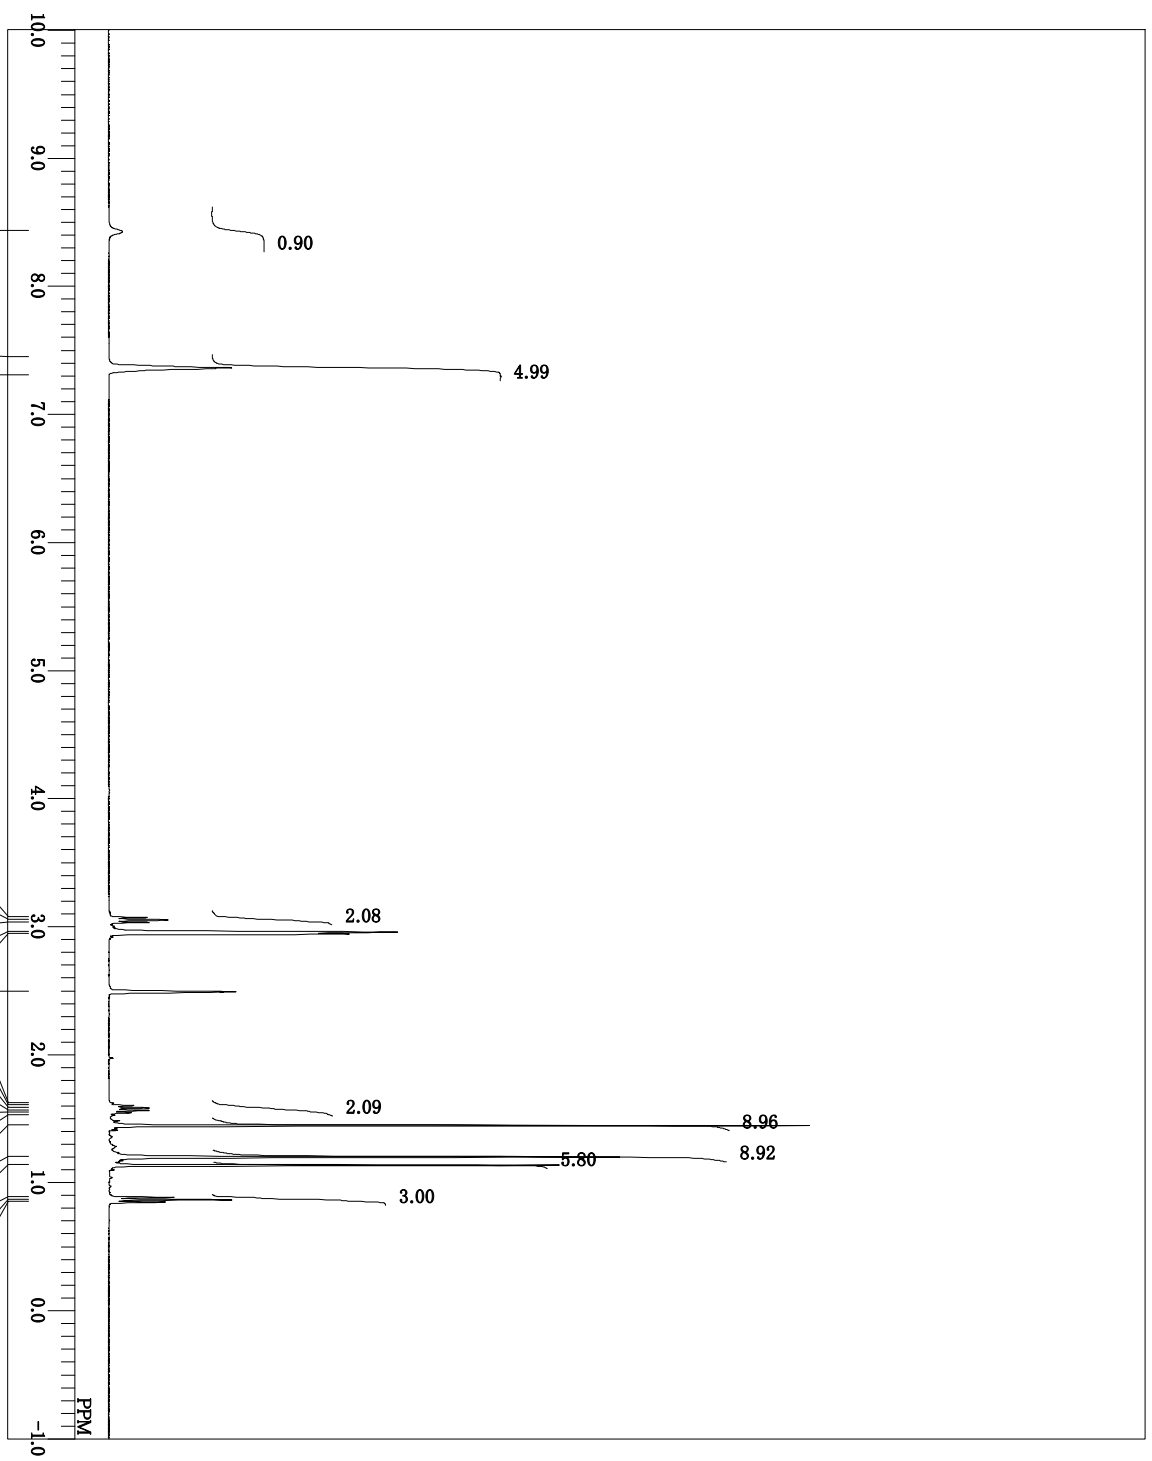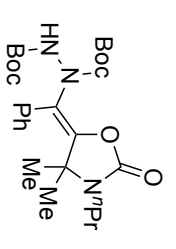

3aA



DRILE  
 COMINT 20190418 amination\_bcm\_110deg-3  
 DATIM single pulse decoupled gated NOE  
 2019-04-18 18:48:08  
 13C  
 EXMOD single-pulse-dec  
 OBPRQ 98.52 MHz  
 OBSET 4.64 KHz  
 OBFIN 8.74 Hz  
 POINT 26224  
 PREQU 24630.17 Hz  
 SCANS 369  
 PD 1.0643 sec  
 2.0000 sec  
 PW1 3.17 usec  
 IRNUC 1H  
 CTEMP 107.0 c  
 DMSO 39.50 ppm  
 EXREF 0.42 Hz  
 BF 36  
 RGAIN

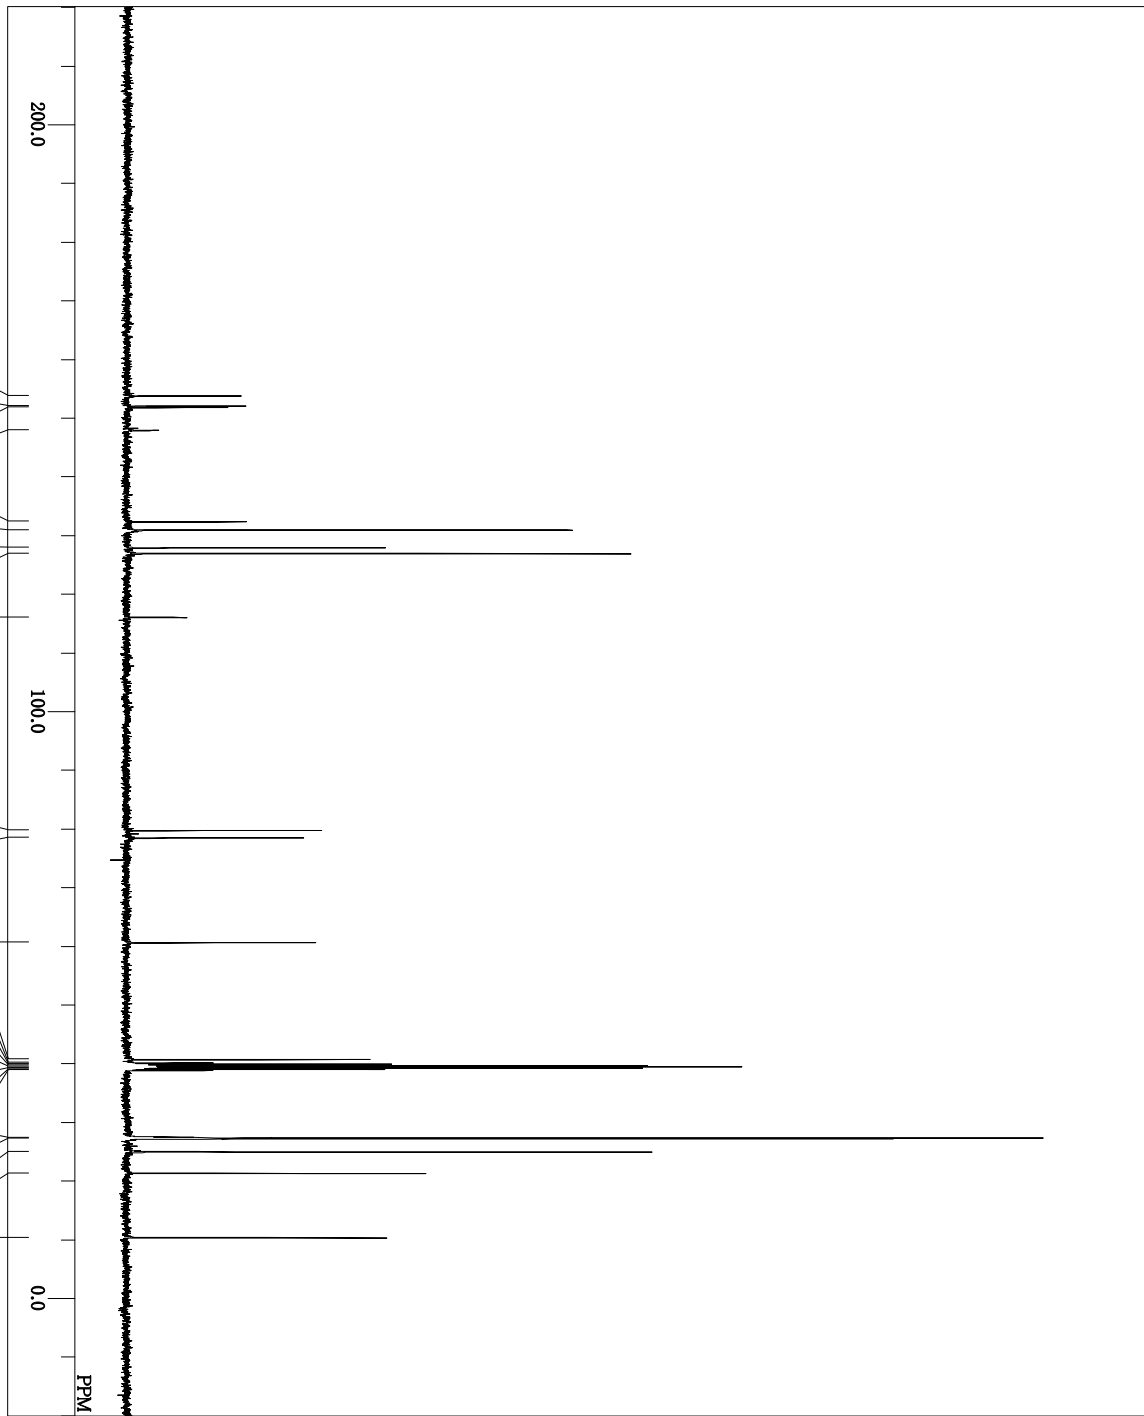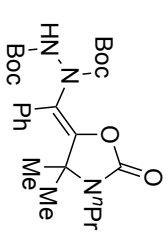

3aA

DRILE  
 COMINT 20200225 Ph.DEAD\_110deg.Proton  
 single-pulse  
 DATIM 2020-02-25 13:36:24  
 OBNUC 1H  
 EXMOD  
 OPRQ 395.88 MHz  
 OBSET 6.28 KHz  
 OBFIN 0.87 Hz  
 POINT 13107  
 FREQU 5938.24 Hz  
 SCANS 8  
 ACQTM 2.2073 sec  
 PD 5.0000 sec  
 PW1 3.14 usec  
 IRNUC 1H  
 CTIMP 110.0 c  
 SLVNT DMSO  
 EXREF 2.49 ppm  
 BF 0.42 Hz  
 RGAIN 24

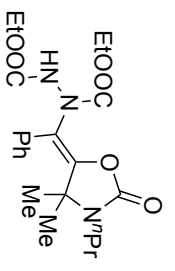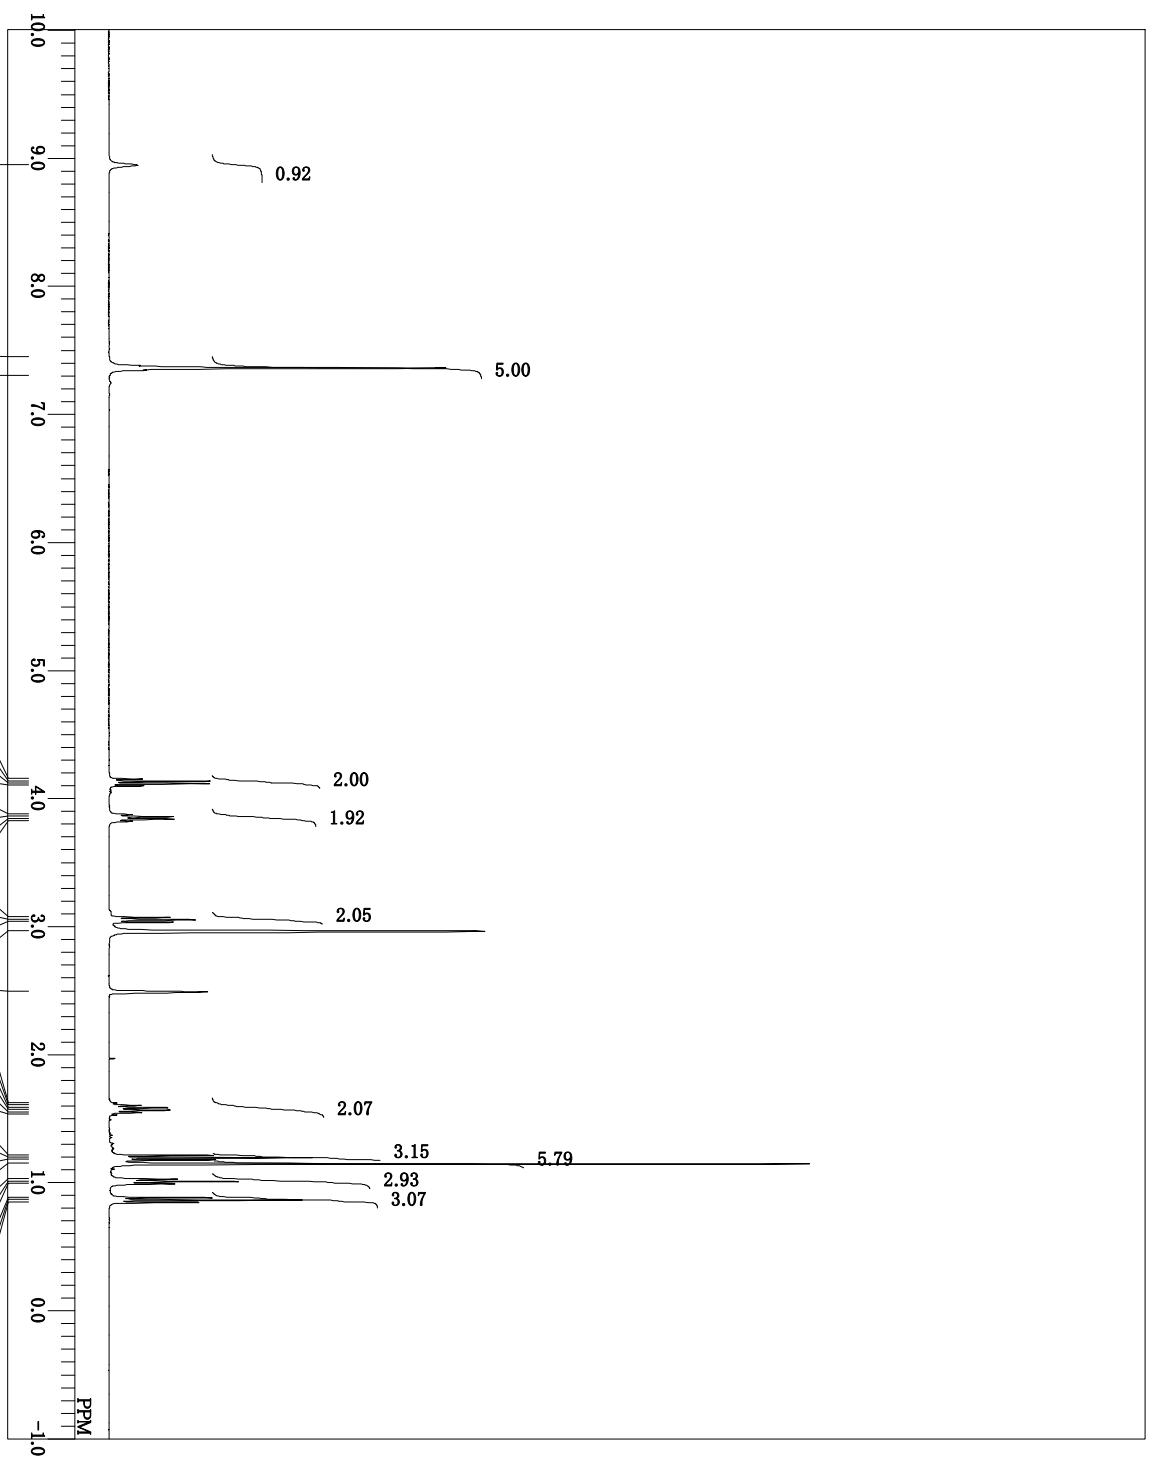

3aB

DRILE  
 COMINT 20200225 Ph\_DEAD\_110deg\_Carbon  
 single pulse decoupled gated NOE  
 DATIM 2020-02-25 13:39:39  
 OBNUC 13C  
 EXMOD carbon\_jrp  
 OBFREQ 99.55 MHz  
 OBSET 5.13 KHz  
 POINT 32767  
 PREQU 31250.00 Hz  
 SCANS 256  
 ACQTM 1.0486 sec  
 PD 2.0000 sec  
 PW1 3.59 usec  
 IRNUC 1H  
 CTEMP 110.0 c  
 SLYNT DMSO  
 EXREF 39.50 ppm  
 BF 0.42 Hz  
 RGAIN 60

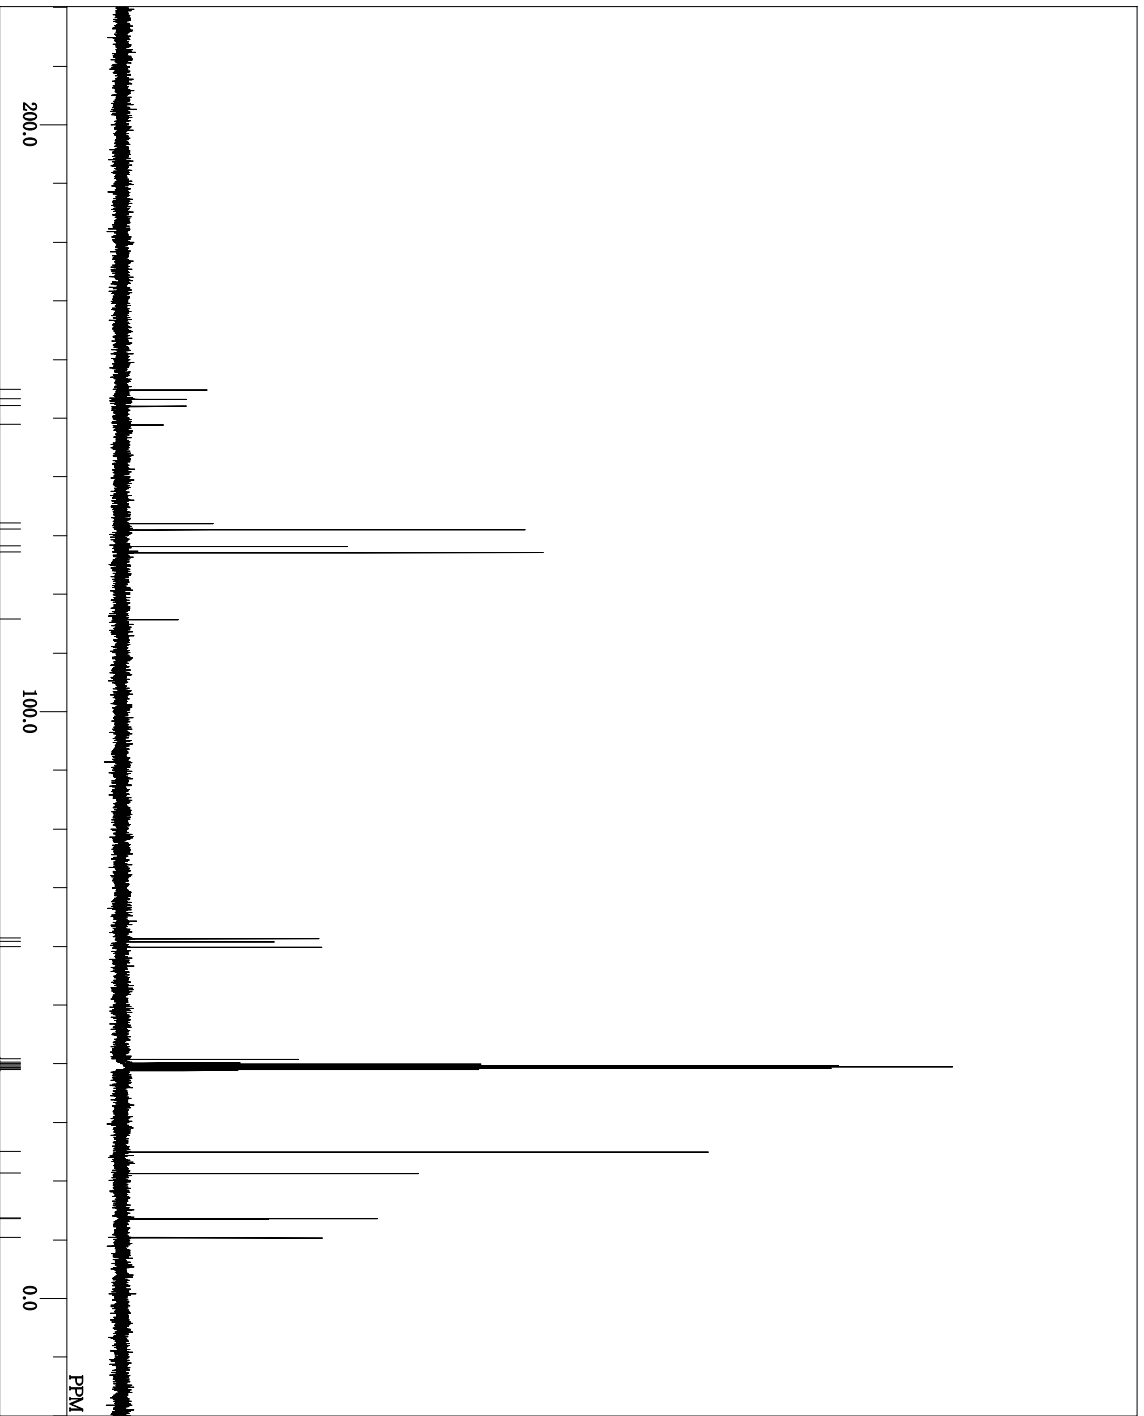

**3aB**

DRILE  
 COMINT  
 DATIM  
 OBNUC  
 EXMOD  
 OFPRQ  
 OBFIN  
 POINT  
 PREQU  
 SCANS  
 ACQTM  
 PD  
 PW1  
 IRNUC  
 CTIMP  
 SLVNT  
 EXREF  
 BF  
 RGAIN

20200222 OMe.DBAD\_110deg.Prot  
 single pulse  
 2020-02-21 20:06:60  
 1H  
 proton, jrp  
 395.88 MHz  
 6.28 KHz  
 0.87 Hz  
 16384  
 7422.80 Hz  
 8  
 2.2073 sec  
 5.0000 sec  
 3.14 usec  
 1H  
 110.0 c  
 DMSO  
 2.49 ppm  
 0.42 Hz  
 Z2

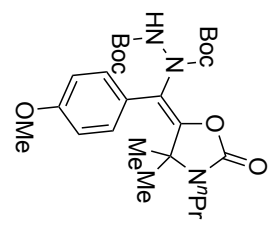

3bA

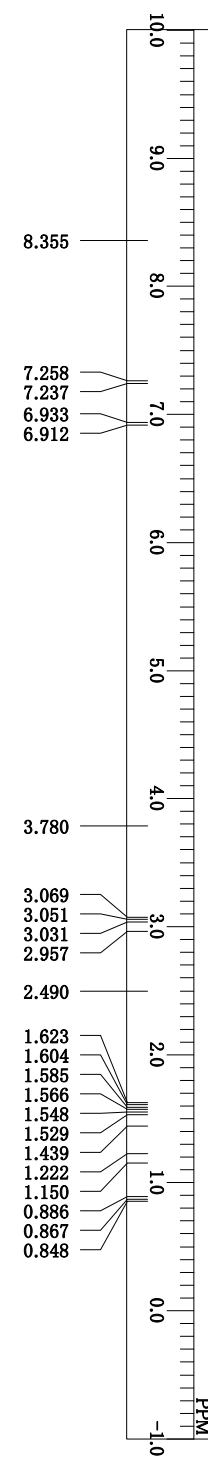

DRILE  
 COMINT  
 DATIM  
 OBNUC  
 EXMOD  
 OBFREQ  
 OBFIN  
 POINT  
 PREQU  
 SCANS  
 ACQTM  
 PD  
 PW1  
 IRNUC  
 CTIMP  
 SLVNT  
 EXREF  
 BF  
 RGAIN

20200327 OMe.DBAD\_110deg\_Carl  
 single pulse decoupled gated NOE  
 2020-03-27 17:47:02  
 13C  
 carbon, jnp  
 99.55 MHz  
 5.13 KHz  
 0.98 Hz  
 32767  
 31250.00 Hz  
 512  
 1.0486 sec  
 2.0000 sec  
 3.59 usec  
 1H  
 110.0 c  
 DMSO  
 39.50 ppm  
 0.42 Hz  
 60

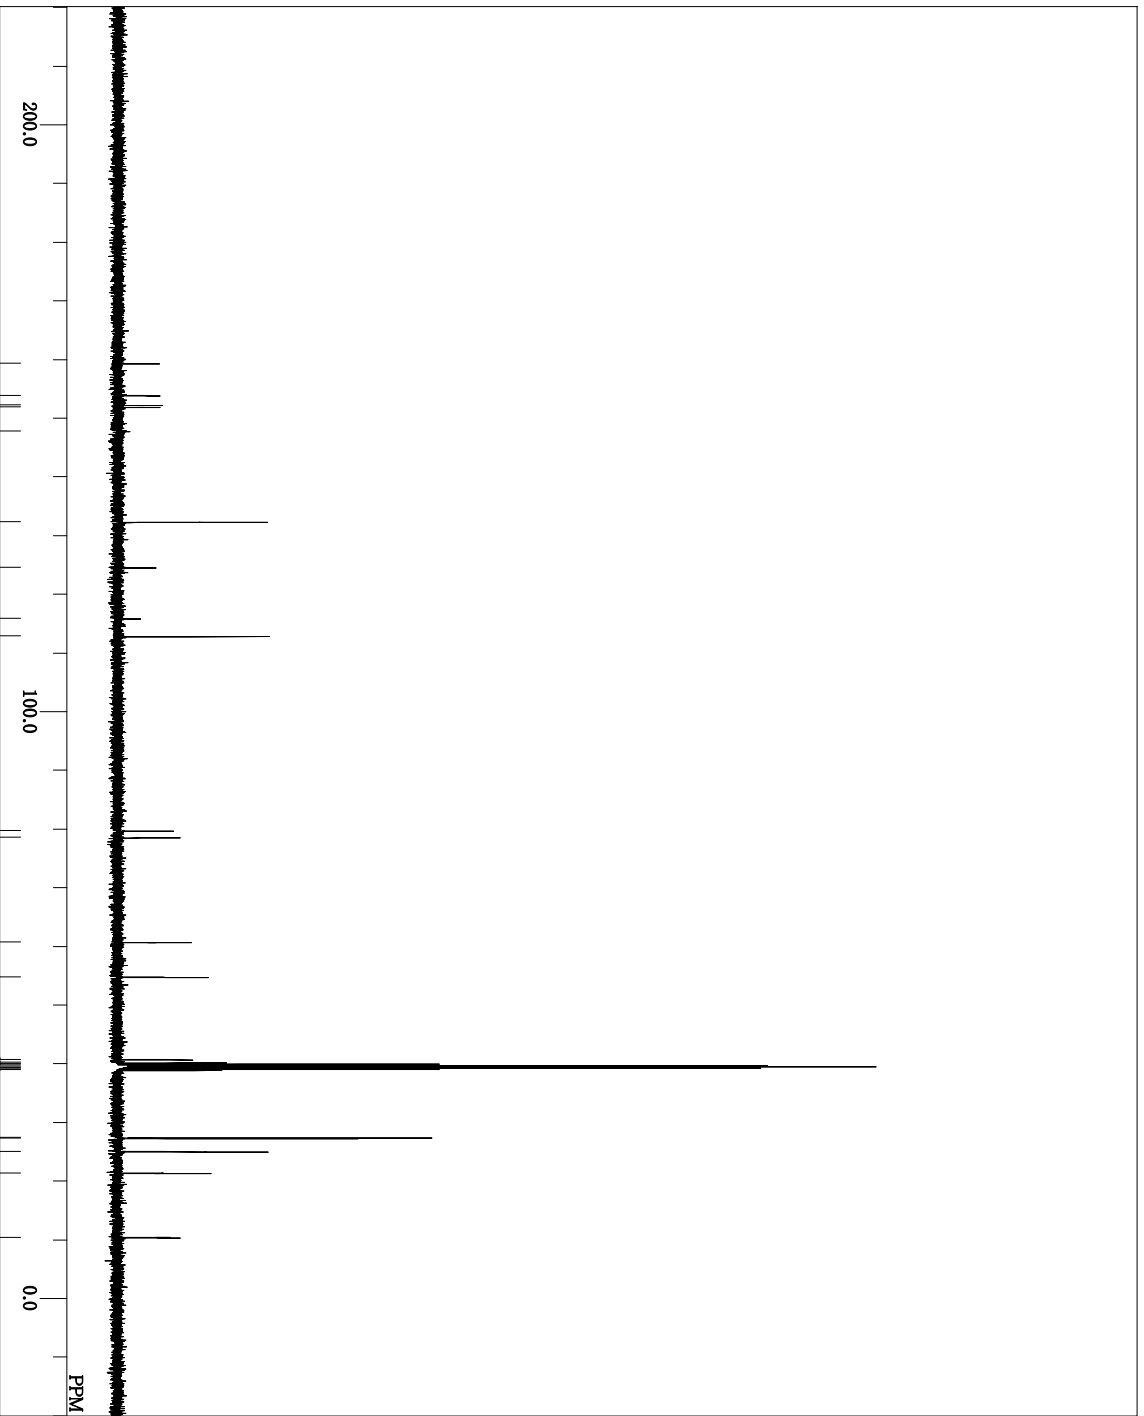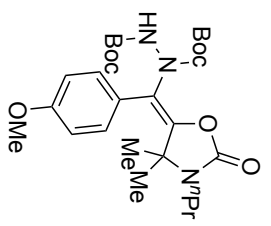

3bA

20200222\_OMe\_DBAD\_110deg.noe  
 DPFGSE NOE ID  
 2020-02-21 20:13:13  
 IH  
 noe\_14.dbfsc.fz  
 395.88 MHz  
 6.28 KHz  
 0.87 Hz  
 16384  
 7422.80 Hz  
 64  
 2.2073 sec  
 7.0000 sec  
 6.28 usec  
 IH  
 110.0 c  
 DMSO  
 7.25 ppm  
 0.42 Hz  
 22  
 RGAIN

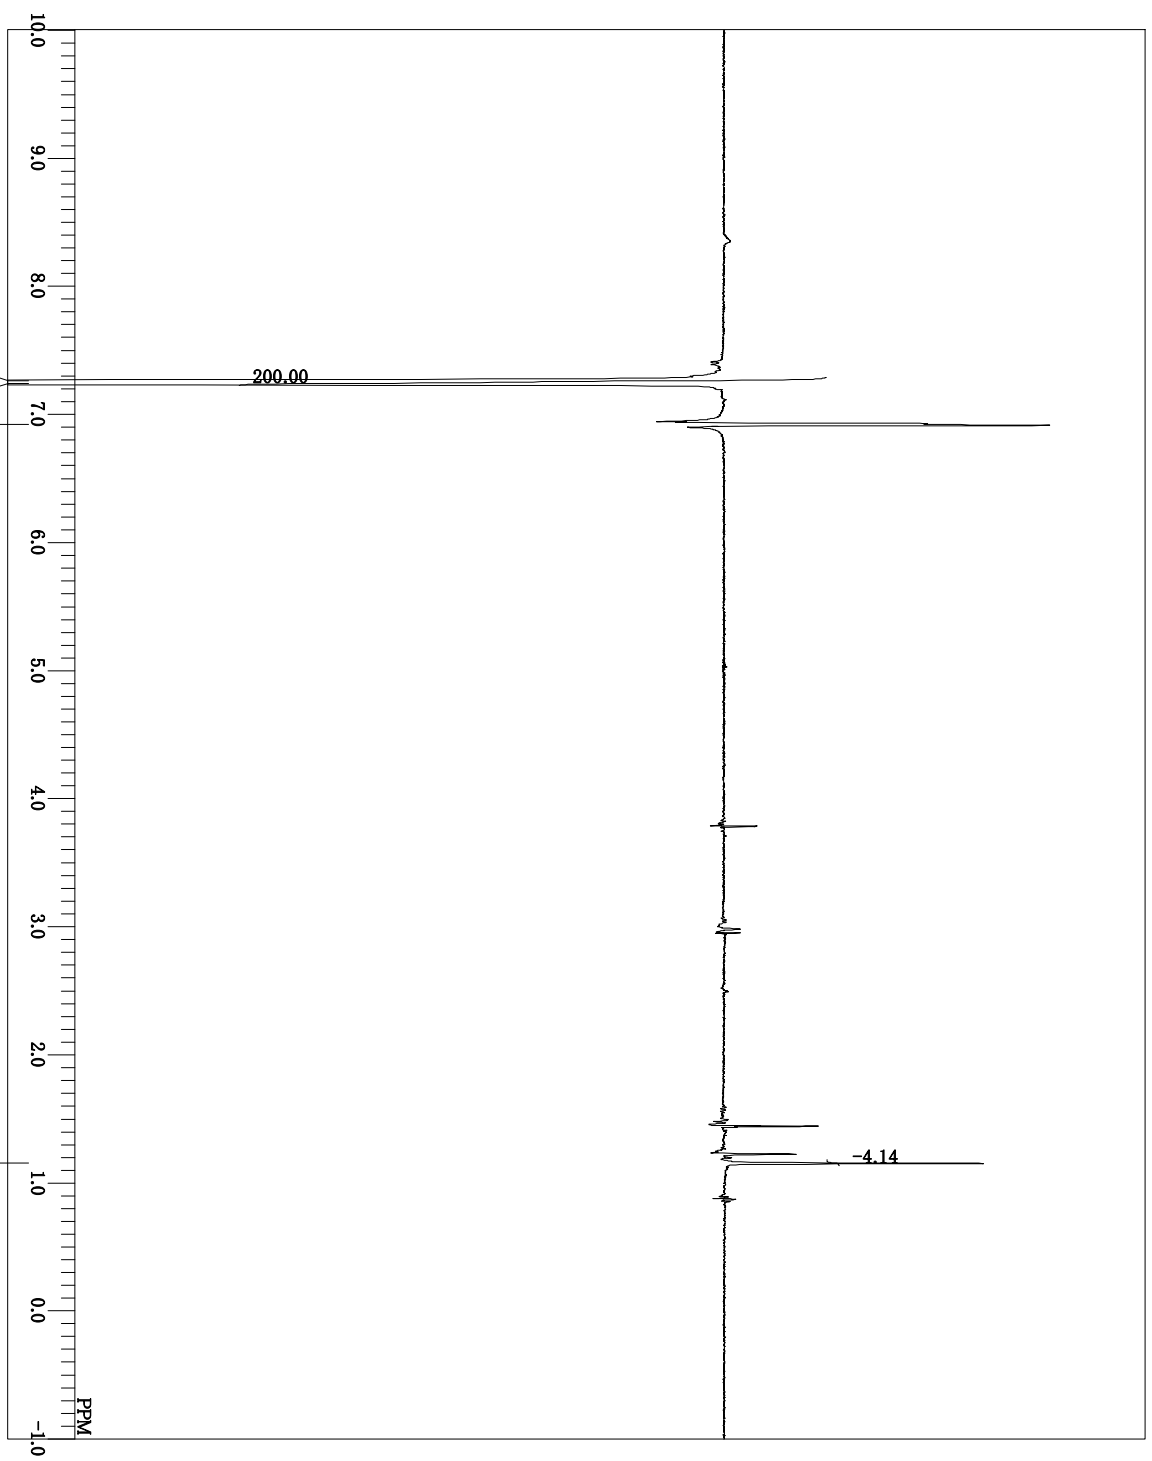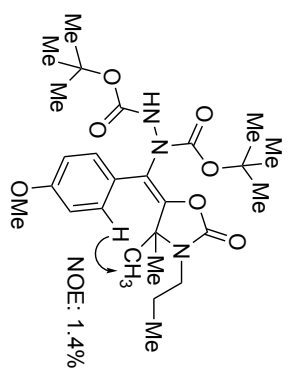

**3bA**

DFILE OMe\_DEAD\_110deg\_Proton-1-1.ak  
 COMINT single\_pulse  
 DATIM 2019-11-28 13:44:08  
 OBNUC 1H  
 EXMOD proton\_jrp  
 OBPRQ 395.88 MHz  
 OBSET 6.28 KHz  
 OBFIN 0.87 Hz  
 POINT 13107  
 PREQU 5938.24 Hz  
 SCANS 8  
 ACQTM 2.2073 sec  
 PD 5.0000 sec  
 PW1 3.14 usec  
 IRNUC 1H  
 CTEMP 110.0 c  
 SLYNT DMSO  
 EXREF 2.49 ppm  
 BF 0.42 Hz  
 RGAIN 22

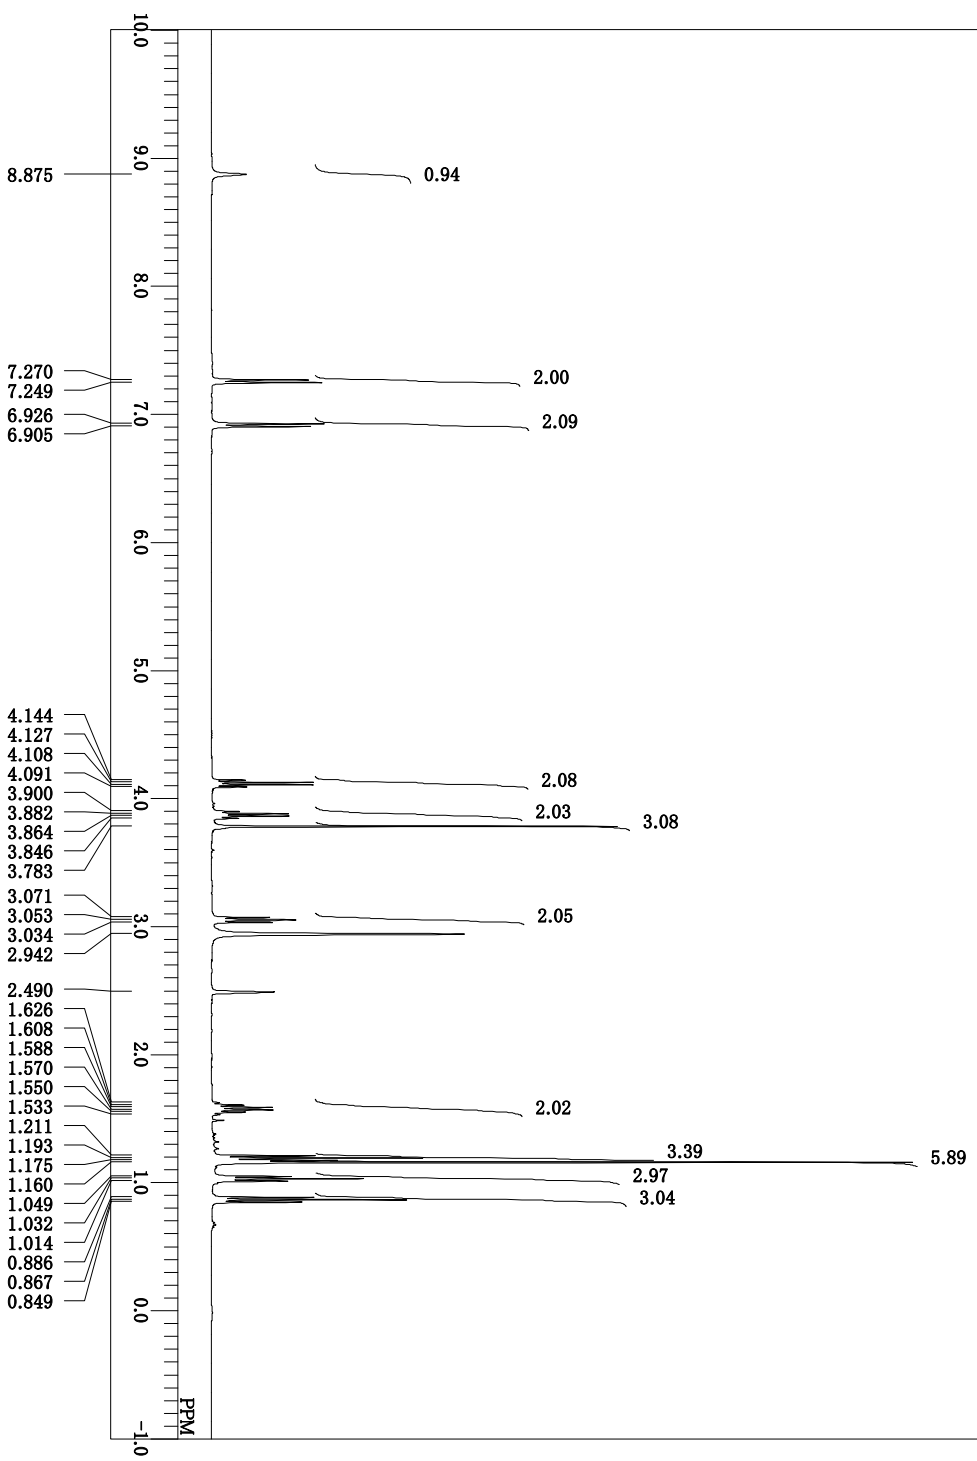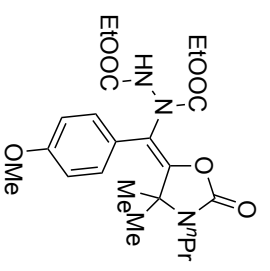

**3bB**

DRILE OMe DEAD 110deg Carbon-1-1 al  
 COMINT single pulse decoupled gated NOE  
 DATIM 2019-11-28 13:47:25  
 OBNUC 13C  
 EXMOD carbon, jrp  
 OBPRQ 99.55 MHz  
 OBSET 5.13 KHz  
 POINT 26214  
 PREQU 25000.00 Hz  
 SCANS 130  
 ACQTM 1.0486 sec  
 PD 2.0000 sec  
 PW1 3.59 usec  
 IRNUC 1H  
 CTEMP 110.0 c  
 SLYNT DMSO  
 EXREF 39.50 ppm  
 BF 0.42 Hz  
 RGAIN 60

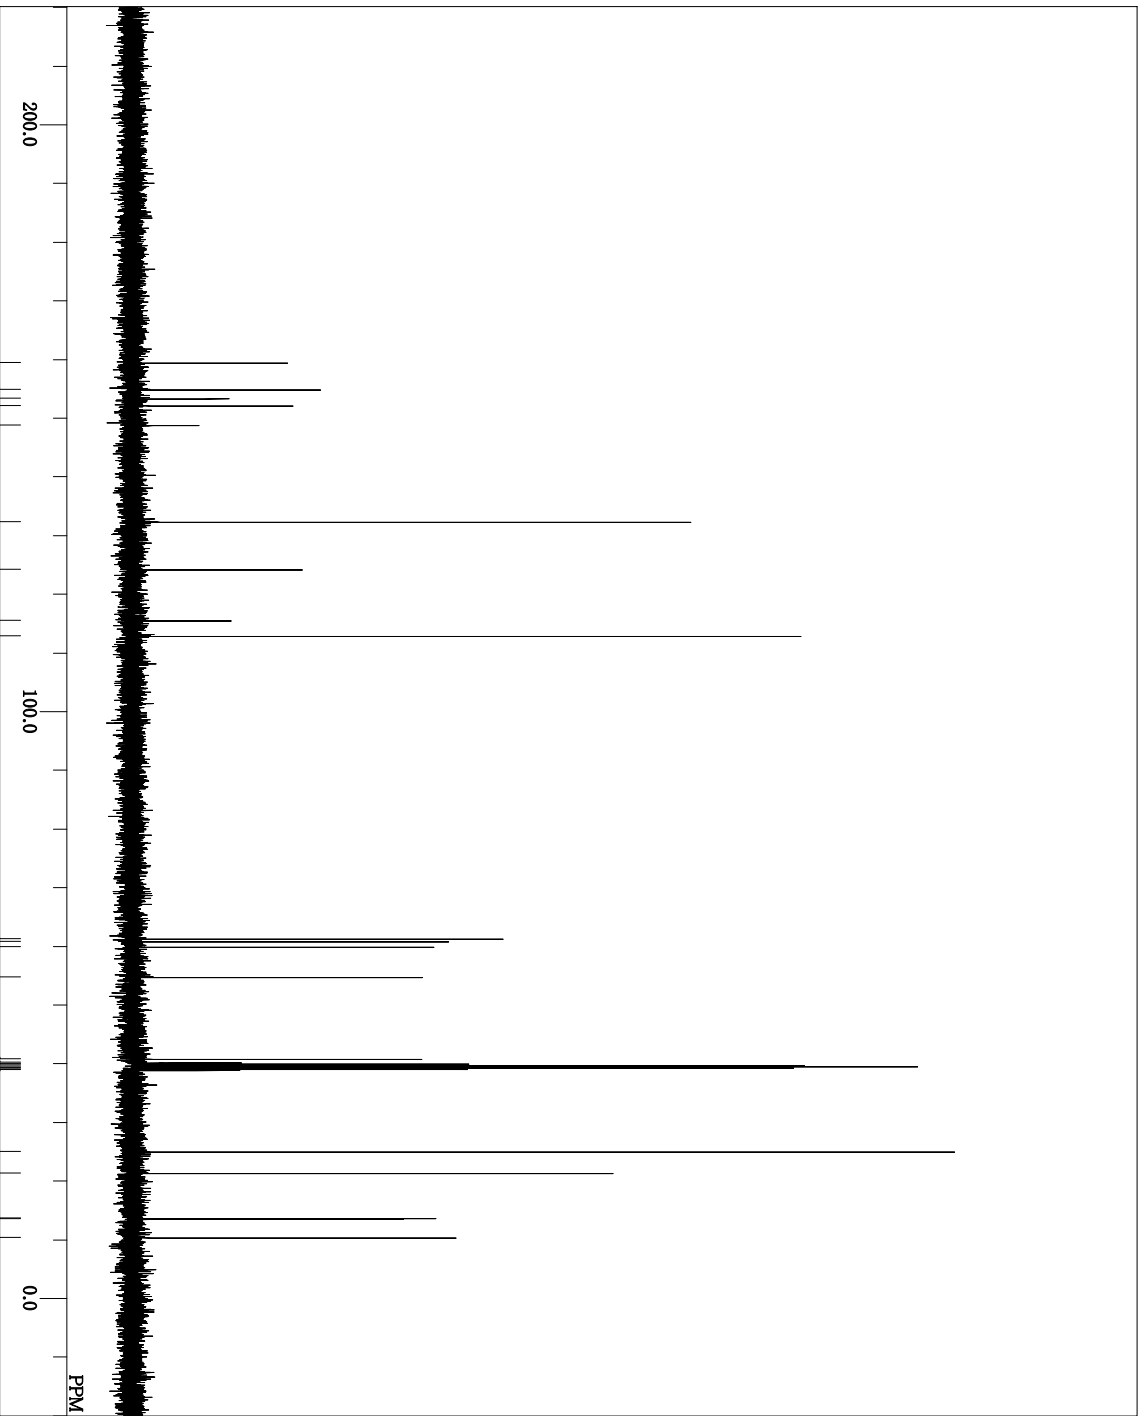

**3bB**



DRFILE 20191205\_OMEAD\_EAD\_noe-1.als  
 COMNT DPFQSE NOE, 1d  
 DATIM 2019-12-05 12:54:22  
 OBNUC 1H  
 EXMOD noe\_1d.dpfqse.ex  
 OBPRQ 391.78 MHz  
 OBSET 8.51 KHz  
 POINT 3.34 Hz  
 16384  
 PREQU 7352.94 Hz  
 SCANS 64  
 ACQTM 2.2282 sec  
 PD 7.0000 sec  
 PW1 11.80 usec  
 IRNUC 1H  
 CTEMP 109.9 c  
 SLYNT DMSO  
 EXREF 7.26 ppm  
 BF 0.42 Hz  
 RGAIN 30

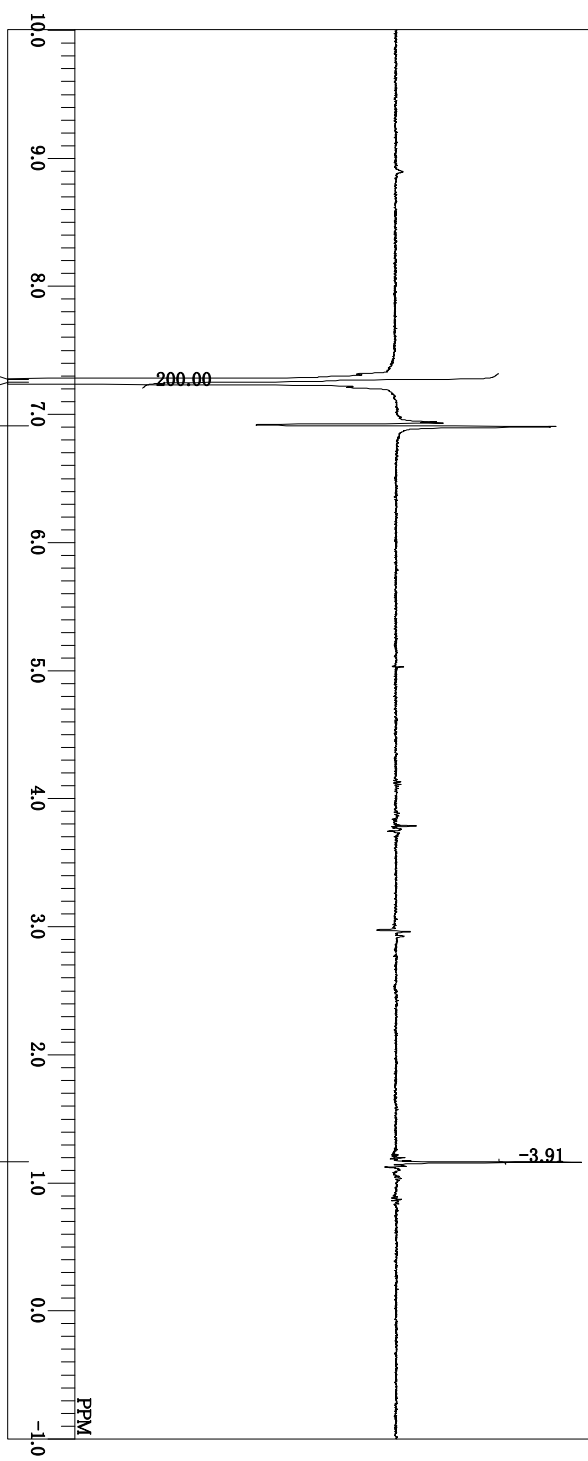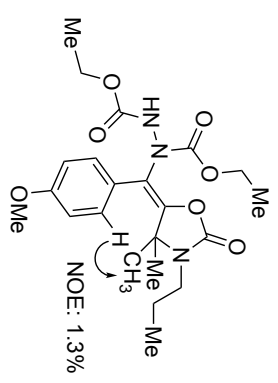

**3bB**



20200220 DBAD\_NMe2\_110deg\_Ca  
 single pulse decoupled gated NOE  
 2020-02-20 13:36:45  
 13C  
 carbon, ipd  
 99.55 MHz  
 5.13 KHz  
 0.98 Hz  
 32767  
 31250.00 Hz  
 127  
 1.0486 sec  
 2.0000 sec  
 3.59 usec  
 PW1  
 IRNUC  
 CTEMP 110.0 c  
 SLVNT DMSO  
 EXREF 39.50 ppm  
 BF 0.42 Hz  
 RGAIN 60

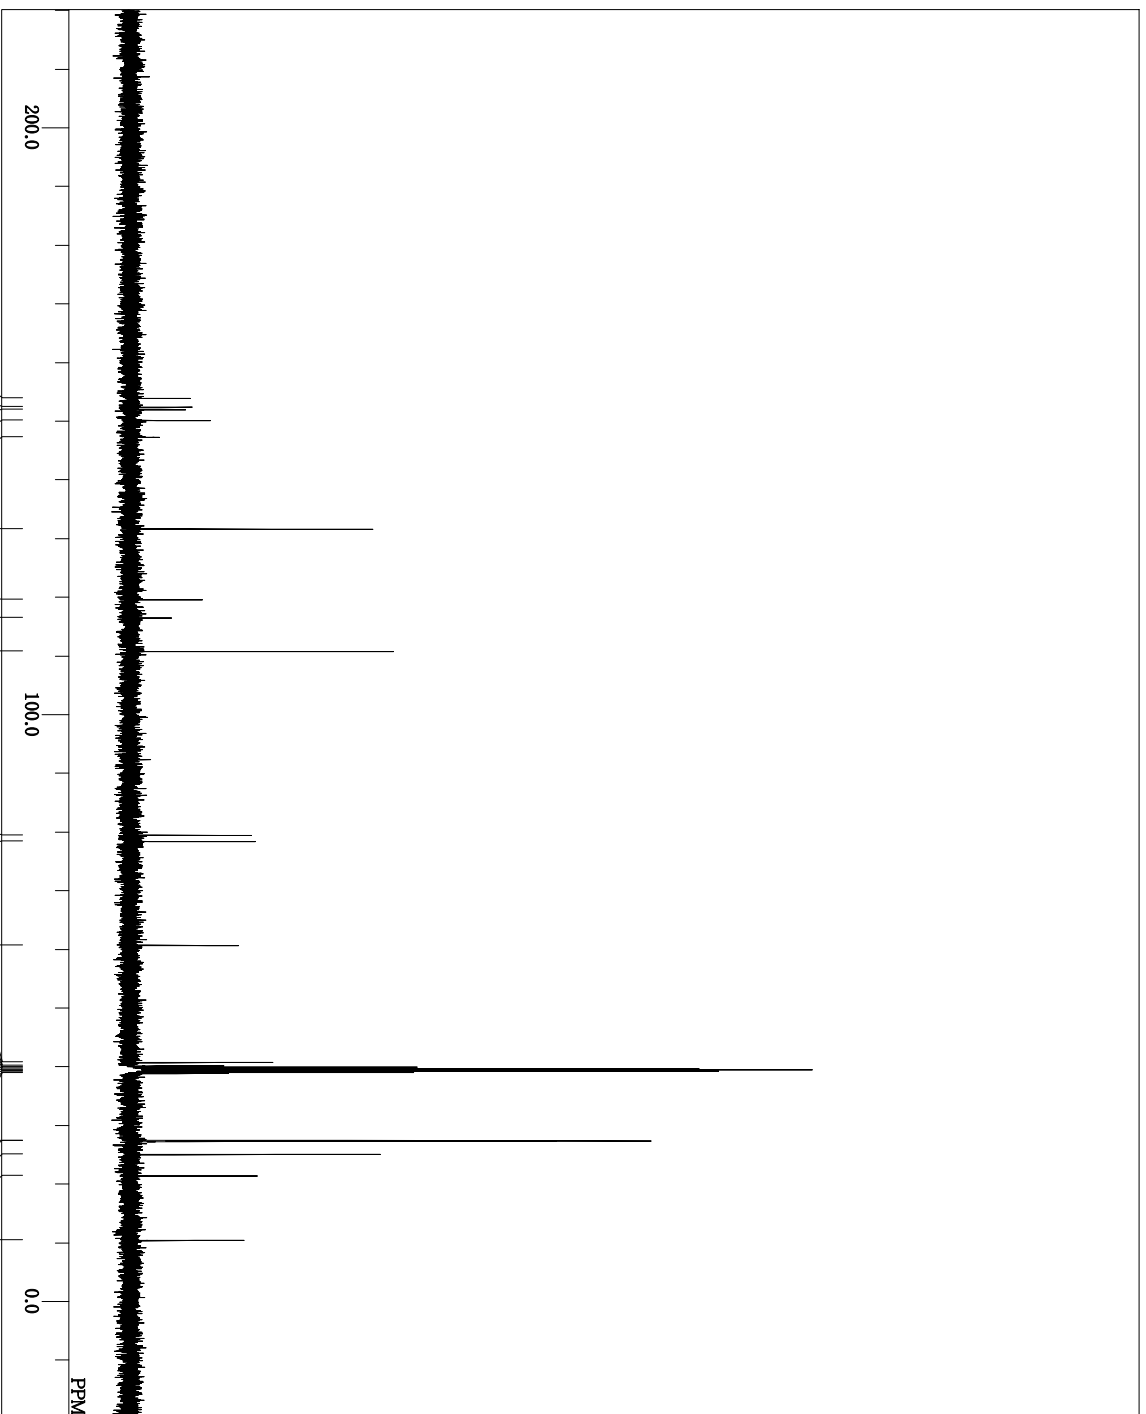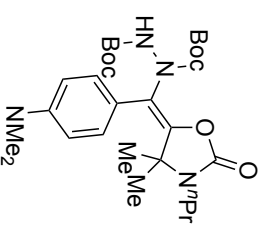

3cA

DRILE  
 COMINT  
 DATIM  
 OBNUC  
 EXMOD  
 OBFRO  
 OBFIN  
 POINT  
 PREQU  
 SCANS  
 ACQTM  
 PD  
 PW1  
 IRNUC  
 CTENP  
 SLVNT  
 EXREF  
 BF  
 RGAIN

20200217 DEAD\_NMe2\_110deg\_Prc  
 single pulse  
 2020-02-17 16:54:08  
 1H  
 proton, f1p  
 395.88 MHz  
 6.28 KHz  
 0.87 Hz  
 13107  
 5938.24 Hz  
 8  
 2.2073 sec  
 5.0000 sec  
 3.14 usec  
 1H  
 110.0 c  
 DMSO  
 2.49 ppm  
 0.42 Hz  
 24

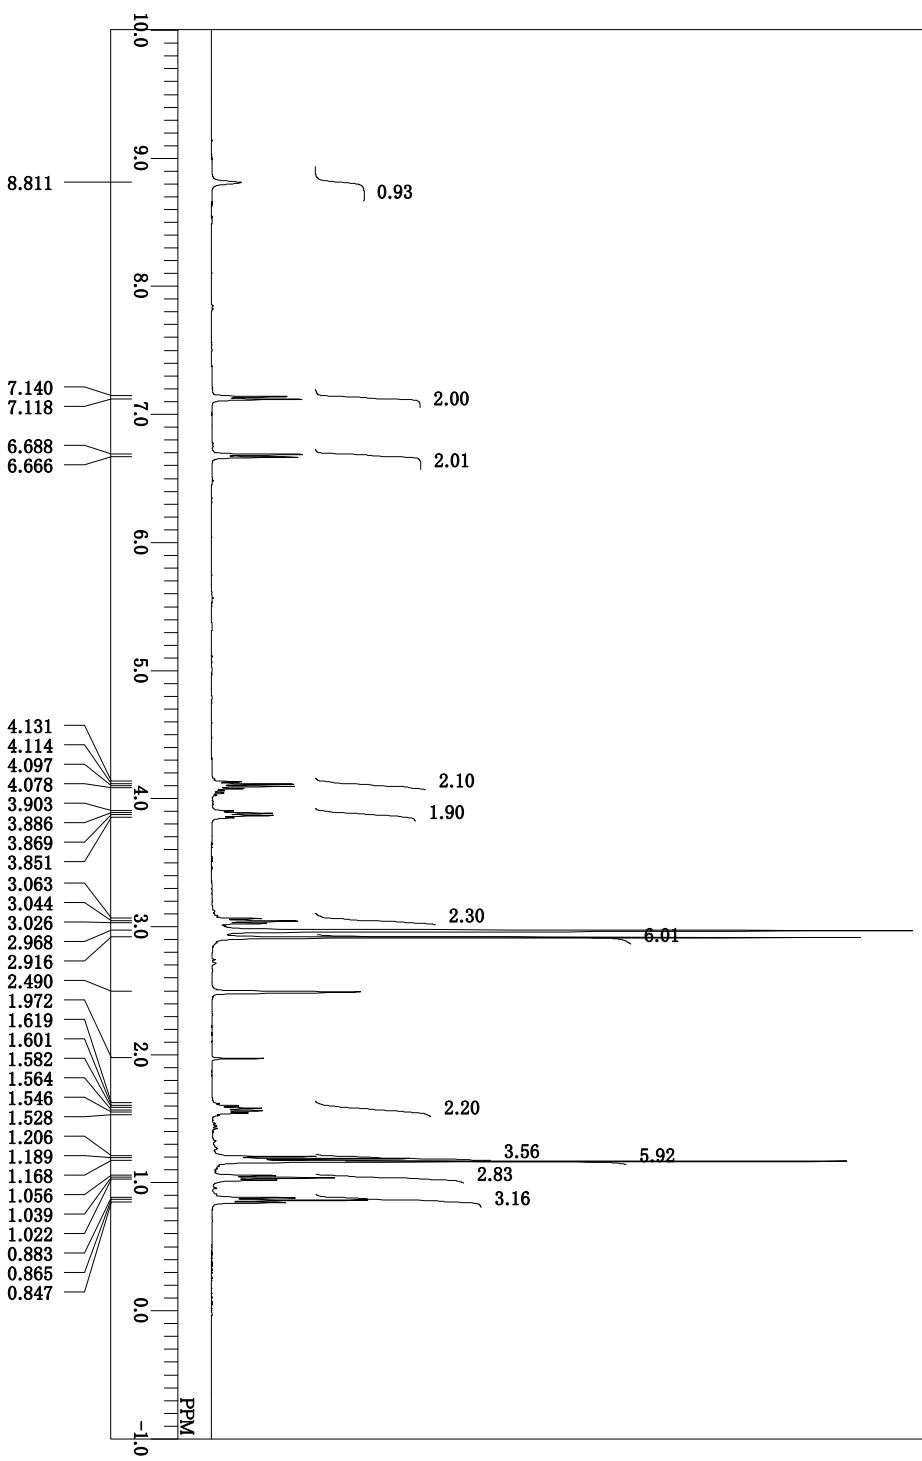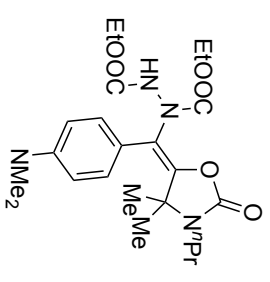

3cB

DRILE  
 COMINT 20200217 DEAD\_NMe2\_110deg\_Ca  
 DATIM single pulse decoupled gated NOE  
 2020-02-17 16:57:24  
 13C  
 carbon, jnp  
 99.55 MHz  
 5.13 KHz  
 0.98 Hz  
 32767  
 31250.00 Hz  
 256  
 1.0486 sec  
 2.0000 sec  
 3.59 usec  
 PW1  
 IRNUC 110.0 c  
 CTIMP  
 SLVNT DMSO  
 EXREF 39.50 ppm  
 BF 0.42 Hz  
 RGAIN 60

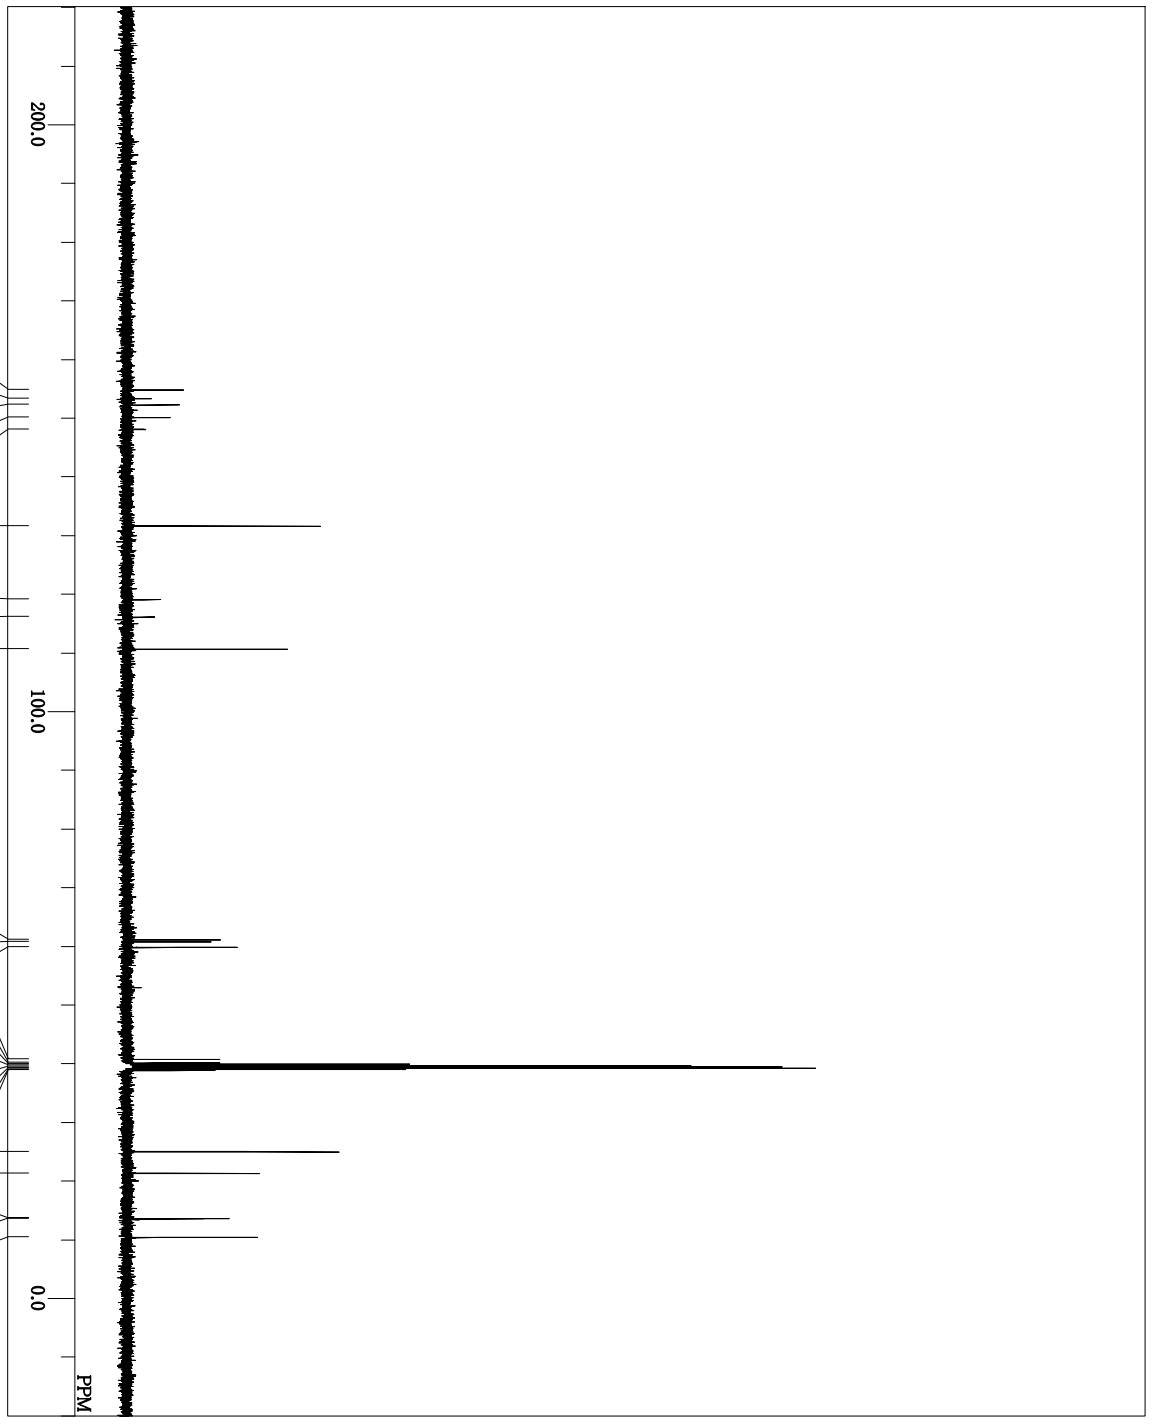

3cB

DR1LE  
 COMINT  
 DATIM  
 OBNUC  
 EXMOD  
 OFPRQ  
 OBSET  
 OBFIN  
 POINT  
 PREQU  
 SCANS  
 ACQTM  
 PD  
 PW1  
 IRNUC  
 CTIMP  
 SLVNT  
 EXREF  
 BF  
 RGAIN

20200307 CLDBAD\_110deg-Proton  
 single pulse  
 2020-03-07 17:59:32  
 1H  
 proton, jrp  
 395.88 MHz  
 6.28 KHz  
 0.87 Hz  
 16384  
 7422.80 Hz  
 8  
 2.2073 sec  
 5.0000 sec  
 3.14 usec  
 1H  
 110.0 c  
 DMSO  
 2.49 ppm  
 0.42 Hz  
 20

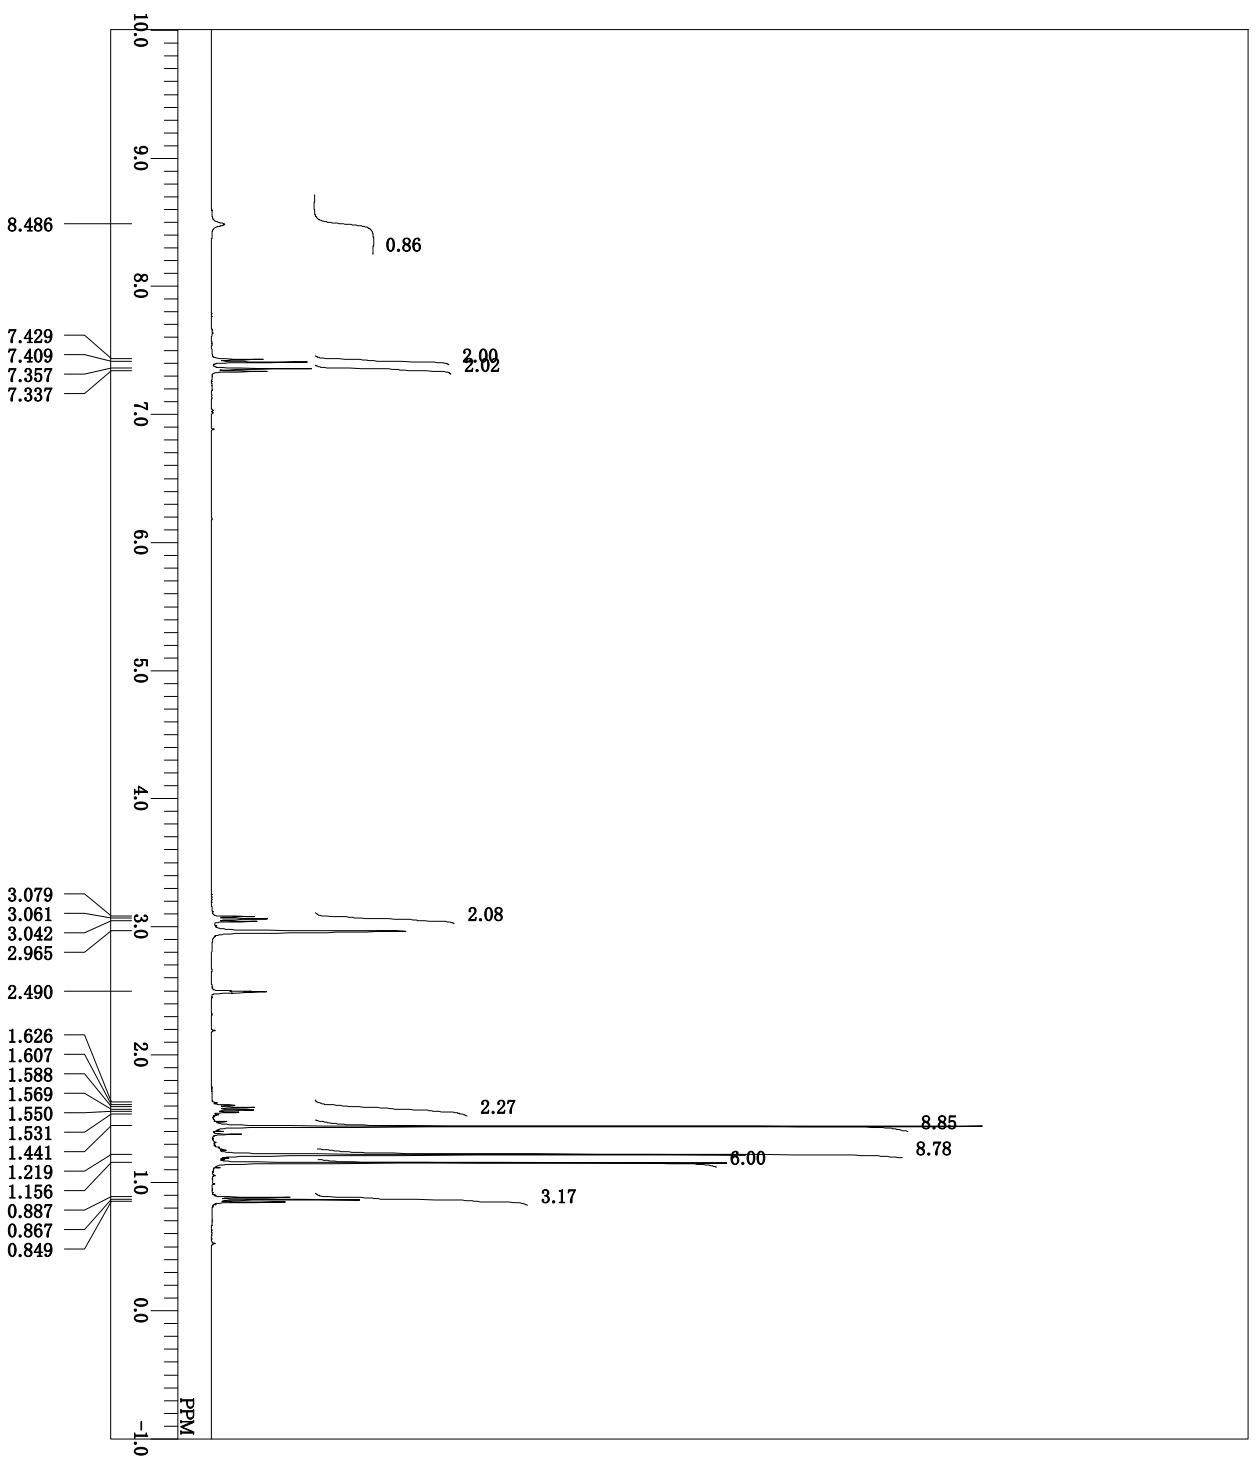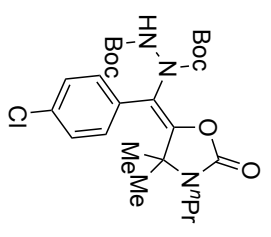

3dA

DRILE  
 COMINT 20200317 ClDBAD\_110deg Carbon  
 COMMENT single pulse decoupled gated NOE  
 DATIM 2020-03-17 15:55:48  
 OBNUC 13C  
 EXMOD carbon\_jrp  
 OBFREQ 99.55 MHz  
 OBSET 5.13 KHz  
 OBFIN 0.98 Hz  
 POINT 32767  
 PREQ 31250.00 Hz  
 SCANS 512  
 ACQTM 1.0486 sec  
 PD 2.0000 sec  
 PW1 3.59 usec  
 IRNUC 1H  
 CTMP 110.0 c  
 SLYNT DMSO  
 EXREF 39.50 ppm  
 BF 0.12 Hz  
 RGAIN 50

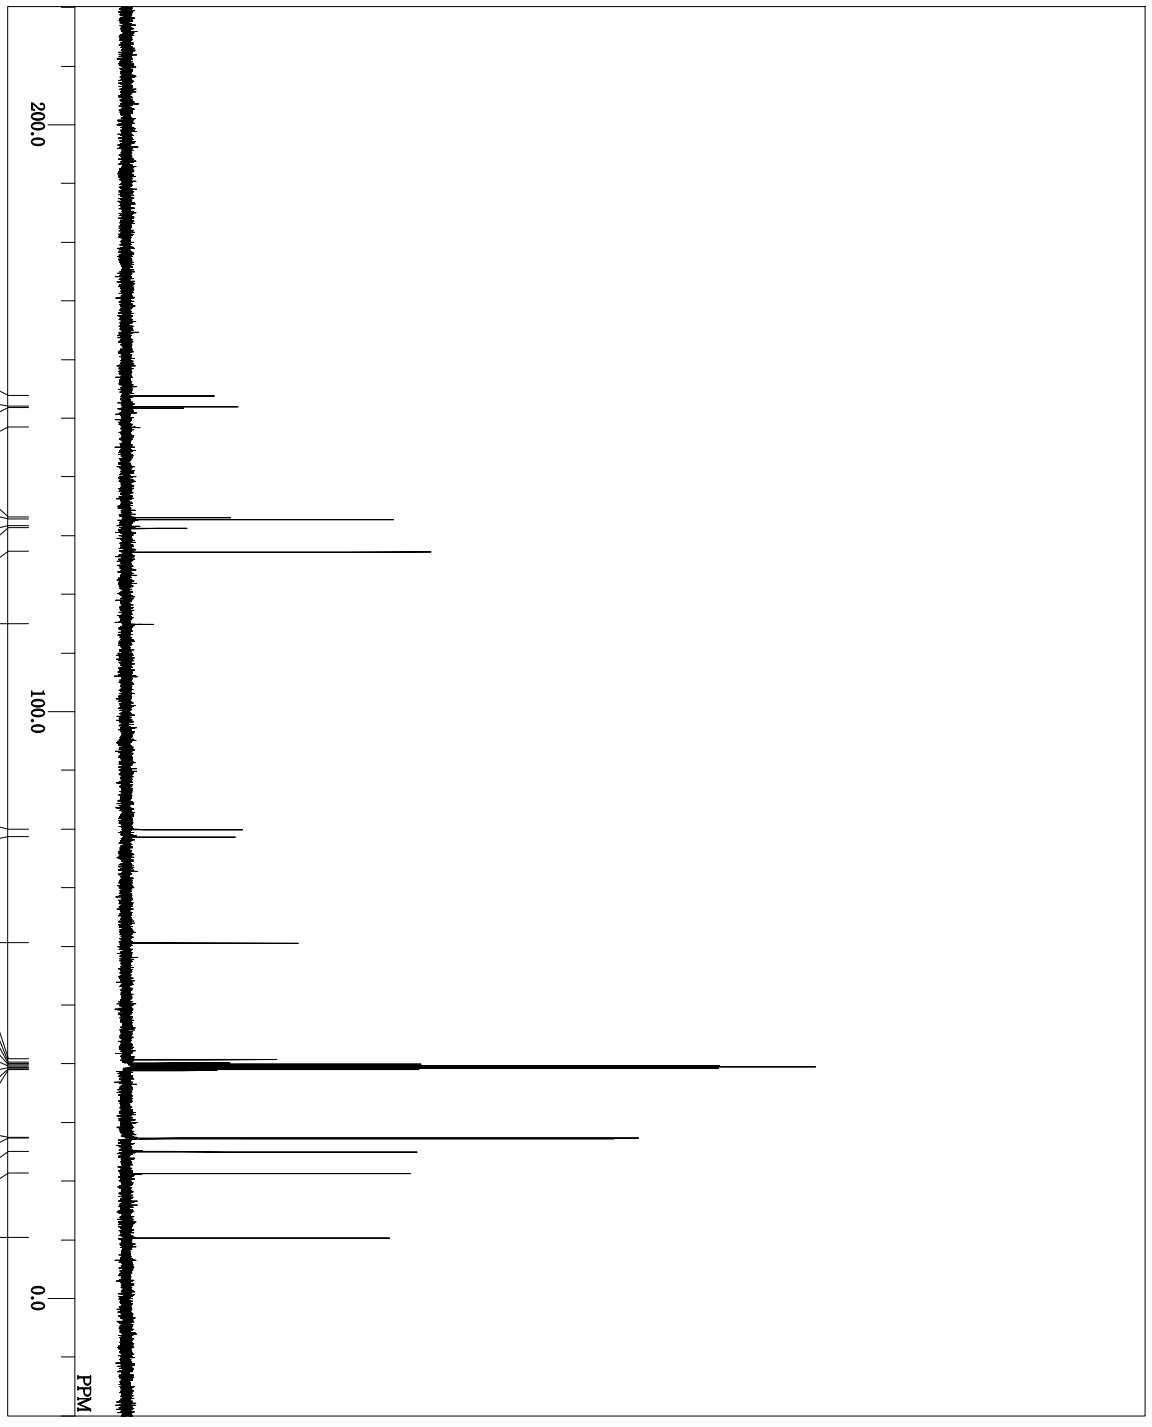

**3dA**

20200218 DEAD\_Cl Proton-1-1.ac  
 proton\_1p  
 395.88 MHz  
 6.28 KHz  
 0.87 Hz  
 13107  
 5938.24 Hz  
 8  
 2.2073 sec  
 5.0000 sec  
 3.14 usec  
 110.0 c  
 DMSO  
 2.49 ppm  
 0.42 Hz  
 20  
 RGAIN

DRILE  
 COMNT  
 DATIM  
 OBNUC  
 EXMOD  
 OPRQ  
 OSET  
 OBFIN  
 POINT  
 PREQU  
 SCANS  
 ACQTM  
 PD  
 PW1  
 IRNUC  
 CTIMP  
 SLVNT  
 EXREF  
 BF  
 RGAIN

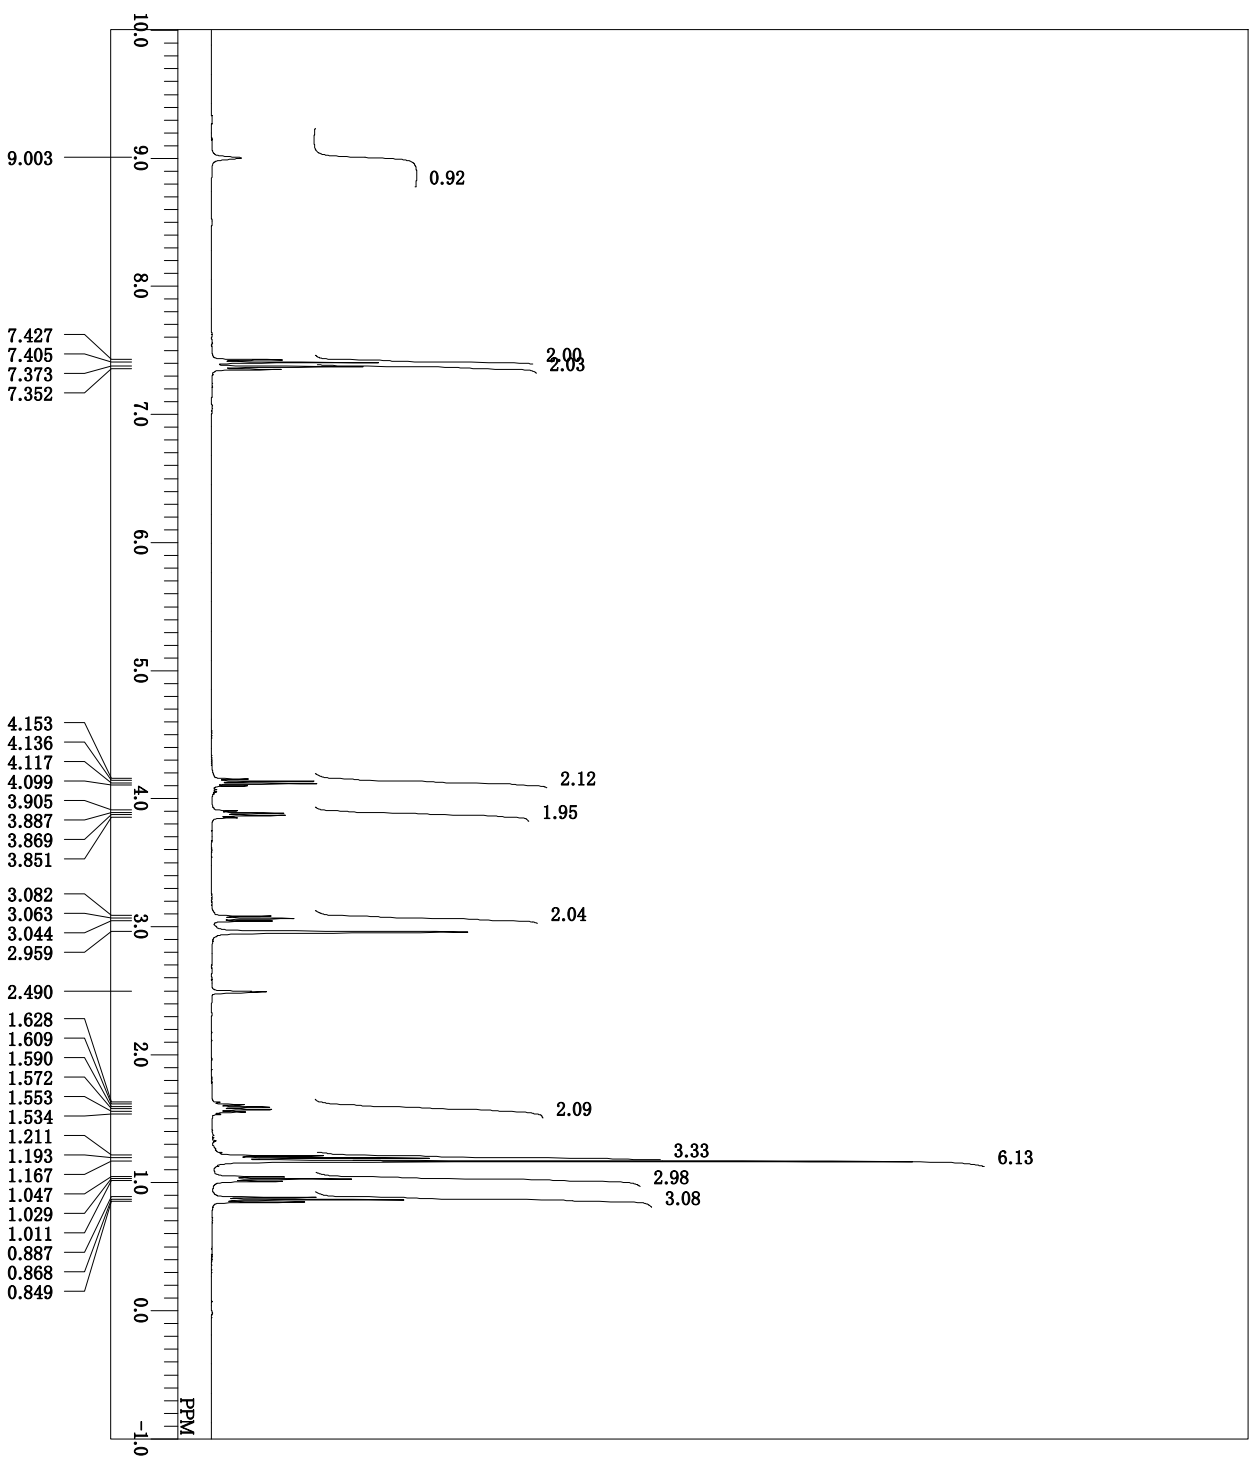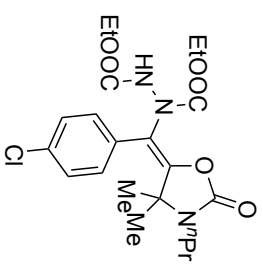

3dB



DRILE  
 COMNT 20200218 DEAD\_C1\_Carbon-1-1.a1  
 DATIM single pulse decoupled gated NOE  
 2020-02-18 19:08:59  
 13C  
 carbon, jnp  
 99.55 MHz  
 OBNUC 5.13 KHz  
 OBFIN 0.98 Hz  
 POINT 32767  
 PREQU 31250.00 Hz  
 SCANS 129  
 ACQTM 1.0486 sec  
 PD 2.0000 sec  
 PW1 3.59 usec  
 IRNUC 1H  
 CTEMP 110.0 c  
 DMSO 39.50 ppm  
 SLYNT 0.42 Hz  
 EXREF BF  
 RGAIN 60

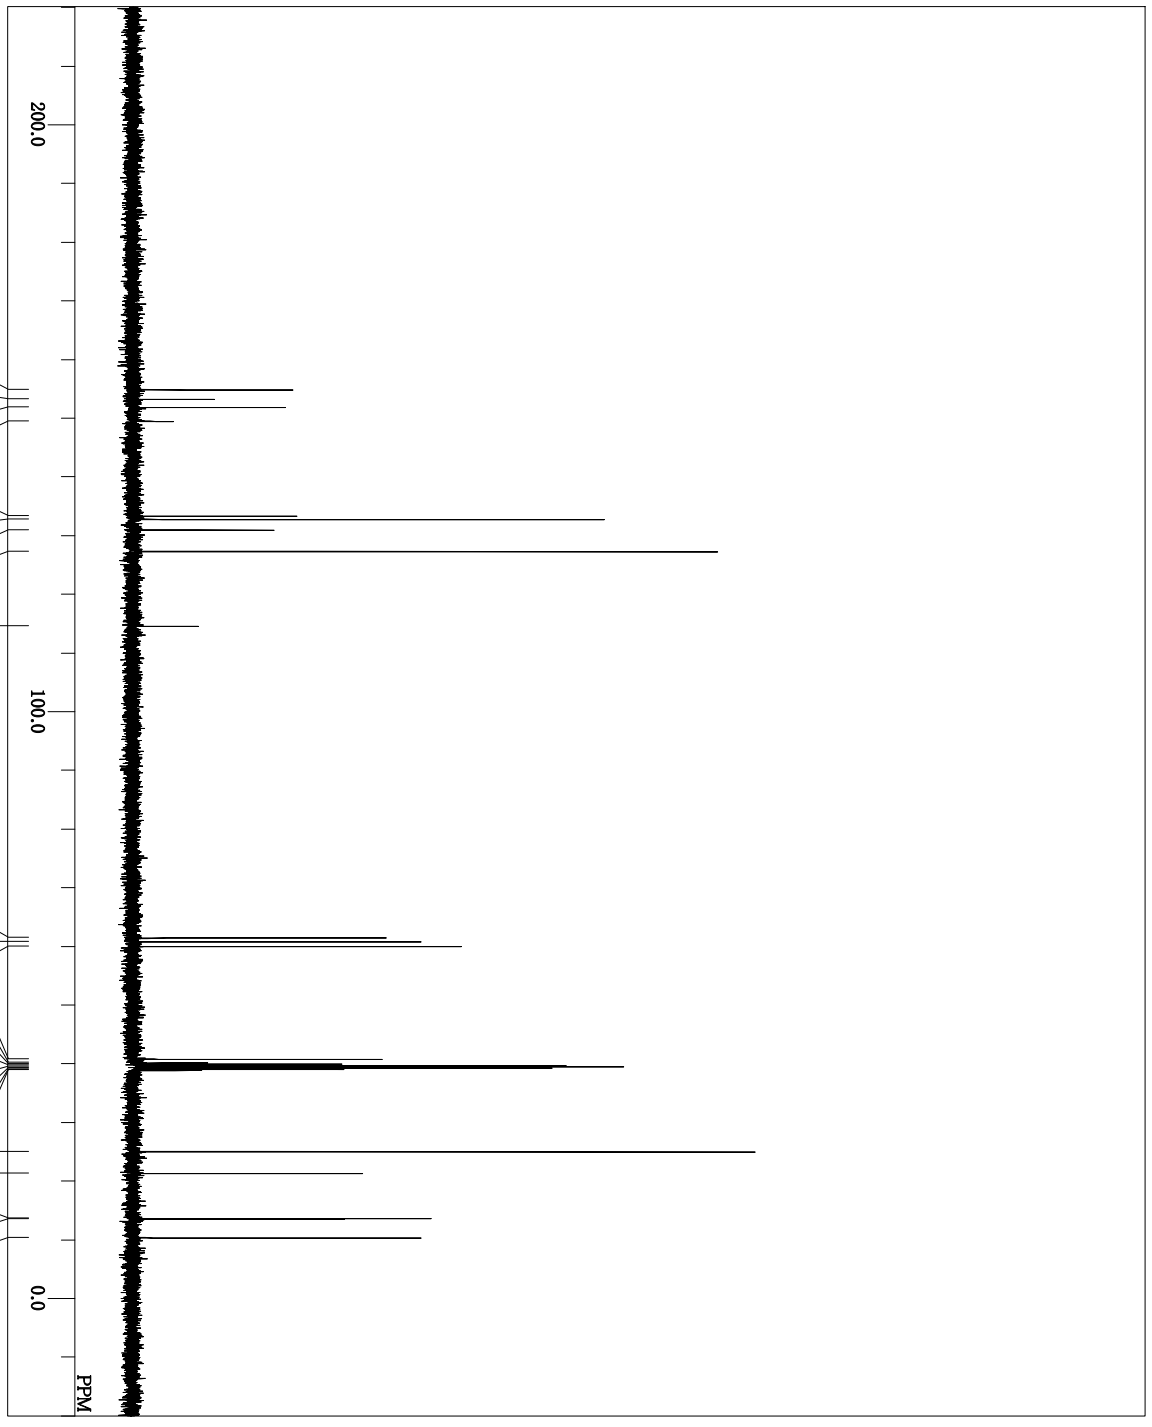

**3dB**

DRILE  
 COMINT  
 DATIM  
 OBNUC  
 EXMOD  
 OBFREQ  
 OBFIN  
 POINT  
 PREQU  
 SCANS  
 ACQTM  
 PD  
 PW1  
 IRNUC  
 CTIMP  
 SLVNT  
 EXREF  
 BF  
 RGAIN

20200220 DBAD\_S.110deg-1.als  
 single-pulse  
 2020-02-20 14:02:45  
 1H  
 single-pulse-ex2  
 391.78 MHz  
 8.51 KHz  
 3.34 Hz  
 26214  
 5882.26 Hz  
 8  
 4.4564 sec  
 3.0000 sec  
 5.90 usec  
 1H  
 110.0 c  
 DMSO  
 2.49 ppm  
 0.42 Hz  
 30

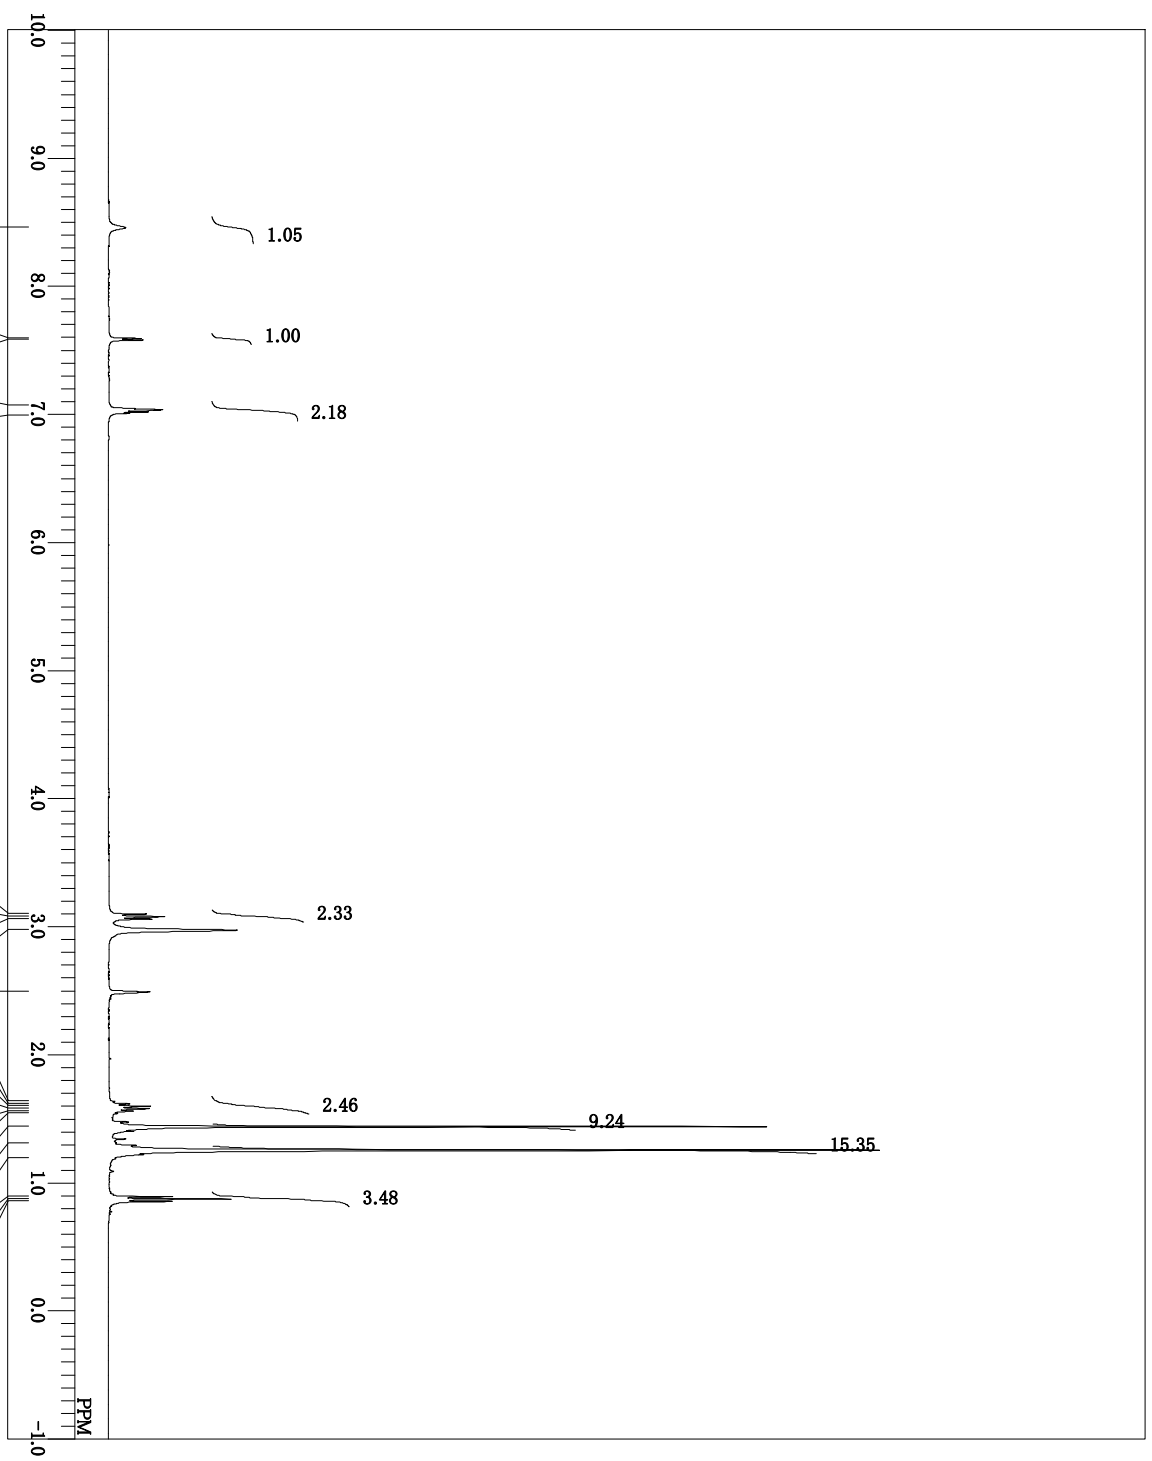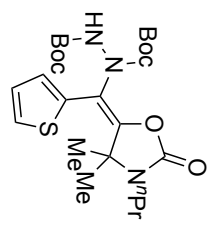

3eA

DRILE  
 COMINT 20200218 DBAD\_S\_110deg\_bom-14  
 DATIM single pulse decoupled gated NOE  
 2020-02-20 14:21:18  
 13C  
 EXMOD single-pulse-dec  
 OBFREQ 98.52 MHz  
 OBSEF 4.64 MHz  
 OBFIN 8.74 Hz  
 POINT 32768  
 PREQ 30788.18 Hz  
 SCANS 256  
 ACQTM 1.0643 sec  
 PD 2.0000 sec  
 PW1 3.17 usec  
 IRNUC 1H  
 CTMPC 110.0 c  
 SLYNT DMSO  
 EXREF 39.50 ppm  
 BF 0.42 Hz  
 RGAIN 40

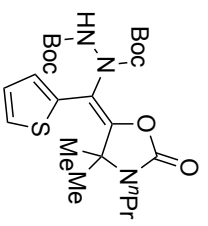

3eA

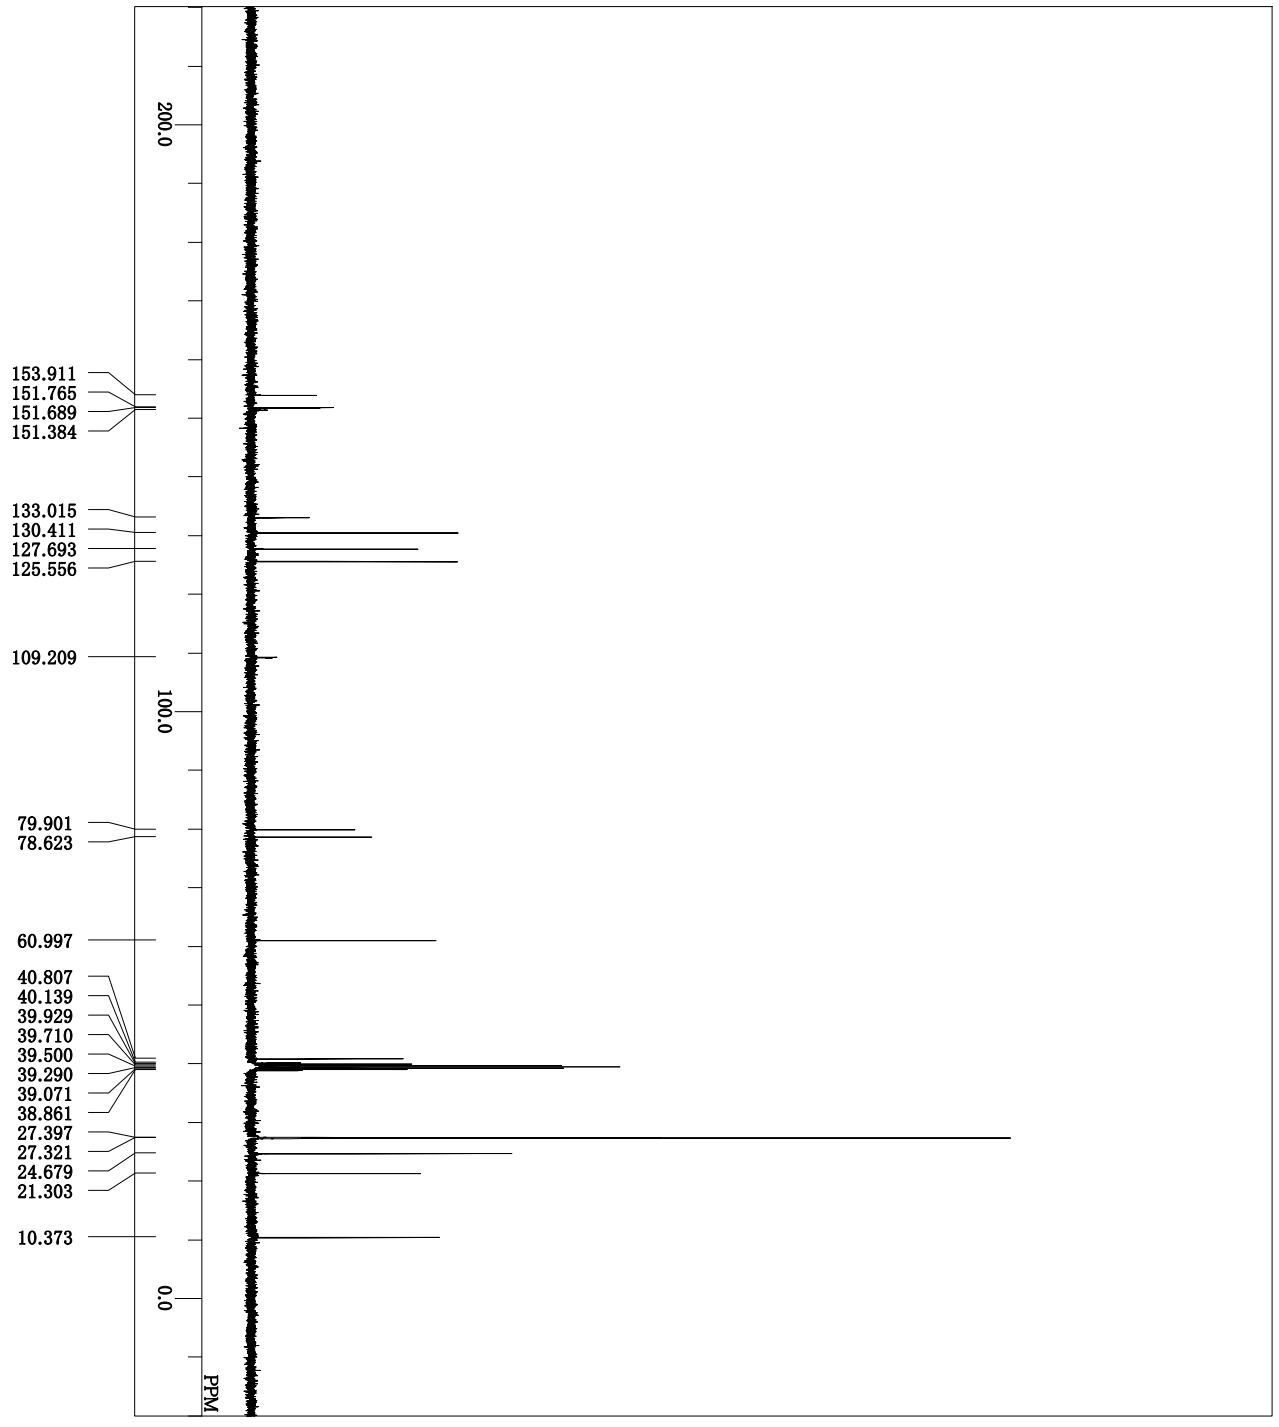

DRILE  
 COMNT S\_DEAD\_110deg\_rev\_Proton-1-1.a1  
 single pulse  
 DATIM 2019-12-03 17:47:45  
 OBNUC 1H  
 EXMOD proton\_frp  
 OBRFQ 395.88 MHz  
 OBFIN 6.28 KHz  
 POINT 0.87 Hz  
 13107  
 FREQU 5938.24 Hz  
 SCANS 8  
 ACQTM 2.2073 sec  
 PD 5.0000 sec  
 PW1 3.14 usec  
 IRNUC 1H  
 CTIMP 110.0 c  
 SLVNT DMSO  
 EXREF 2.49 ppm  
 BF 0.42 Hz  
 RGAIN 28

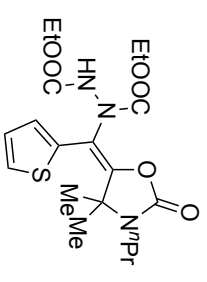

3eB

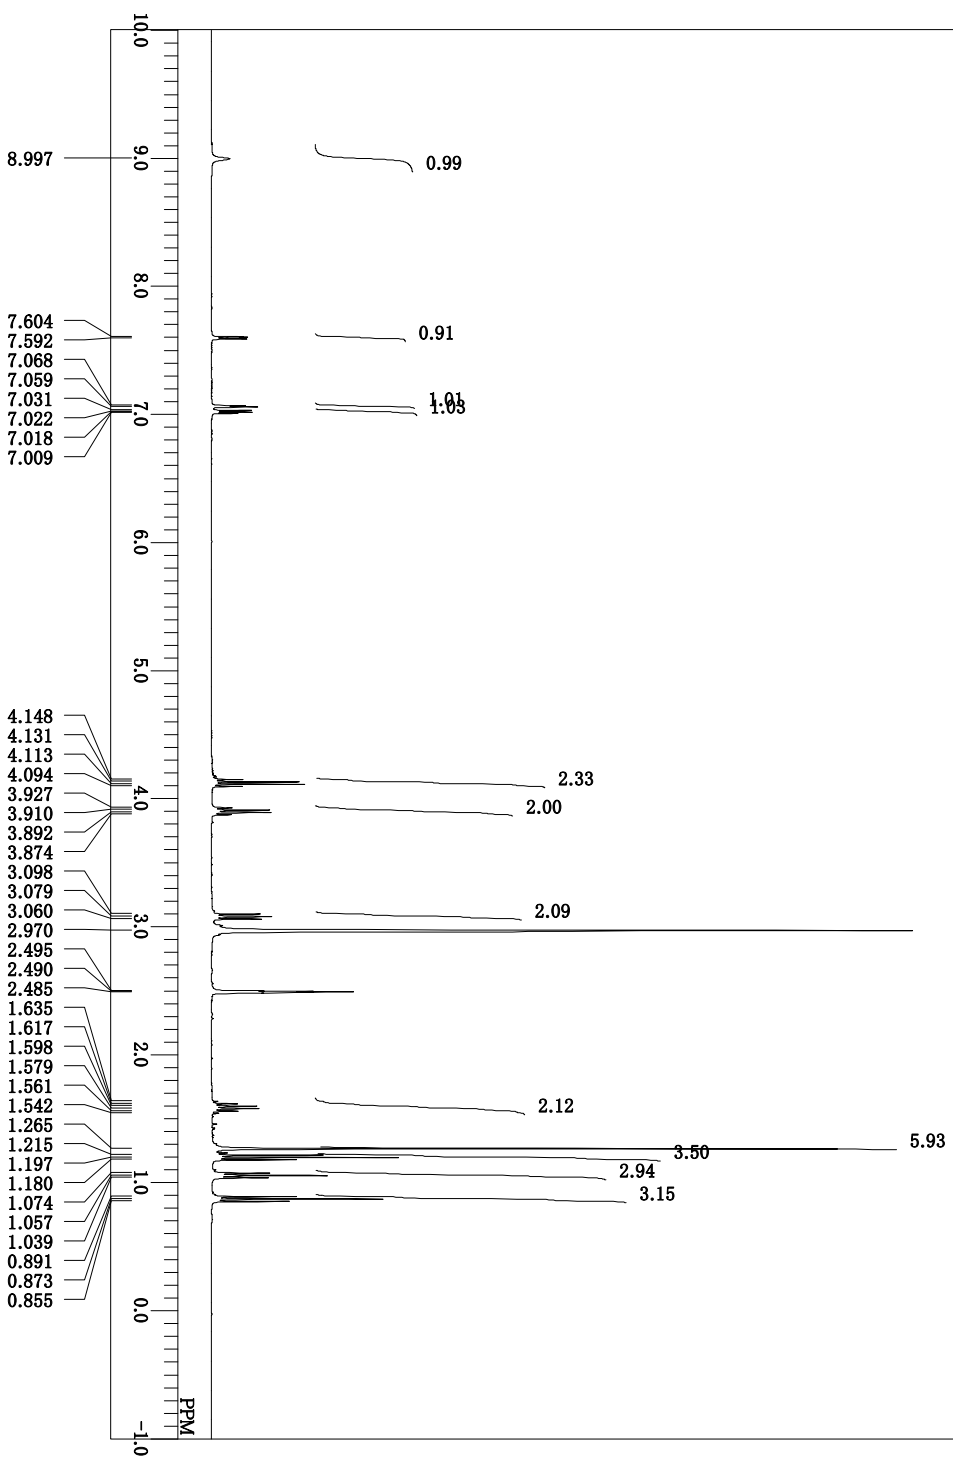

DRILE S\_DEAD.110deg.rev\_Carbon-2-1.d  
 COMINT single pulse decoupled gated NOE  
 DATIM 2019-12-03 18:07:08  
 OBNUC 13C  
 EXMOD carbon\_jrp  
 OBFREQ 99.55 MHz  
 OBSET 5.13 KHz  
 OBFIN 0.98 Hz  
 POINT 32767  
 PREQU 31250.00 Hz  
 SCANS 512  
 ACQTM 1.0486 sec  
 PD 2.0000 sec  
 PW1 3.59 usec  
 IRNUC 1H  
 CTEMP 110.0 c  
 SLYNT DMSO  
 EXREF 39.50 ppm  
 BF 0.42 Hz  
 RGAIN 50

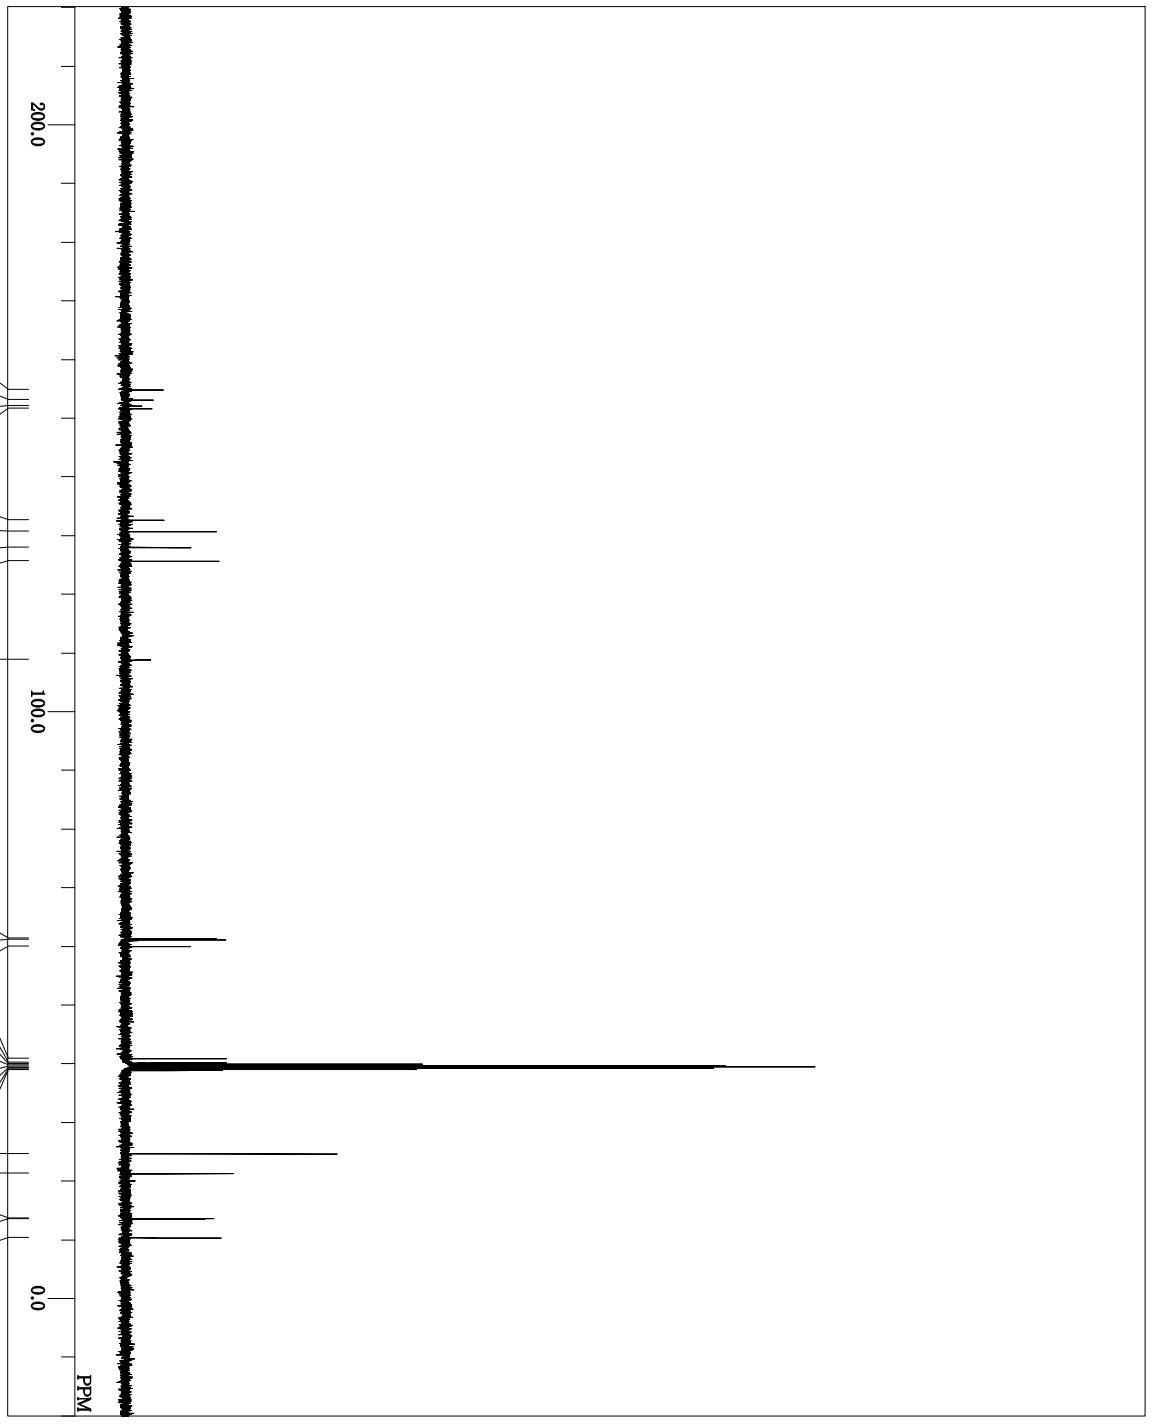

3eB

DRILE  
 COMINT  
 DATIM  
 OBNUC  
 EXMOD  
 OBFREQ  
 OBFIN  
 POINT  
 PREQU  
 SCANS  
 ACQTM  
 PD  
 PW1  
 IRNUC  
 CTIMP  
 SLVNT  
 EXREF  
 BF  
 RGAIN

20200222 0ToLDBAD\_110degProt  
 single-pulse  
 2020-02-22 17:49:58  
 1H  
 proton, f1p  
 395.88 MHz  
 6.28 KHz  
 0.87 Hz  
 13107  
 5938.24 Hz  
 8  
 2.2073 sec  
 5.0000 sec  
 3.14 usec  
 1H  
 110.0 c  
 DMSO  
 2.49 ppm  
 0.42 Hz  
 20

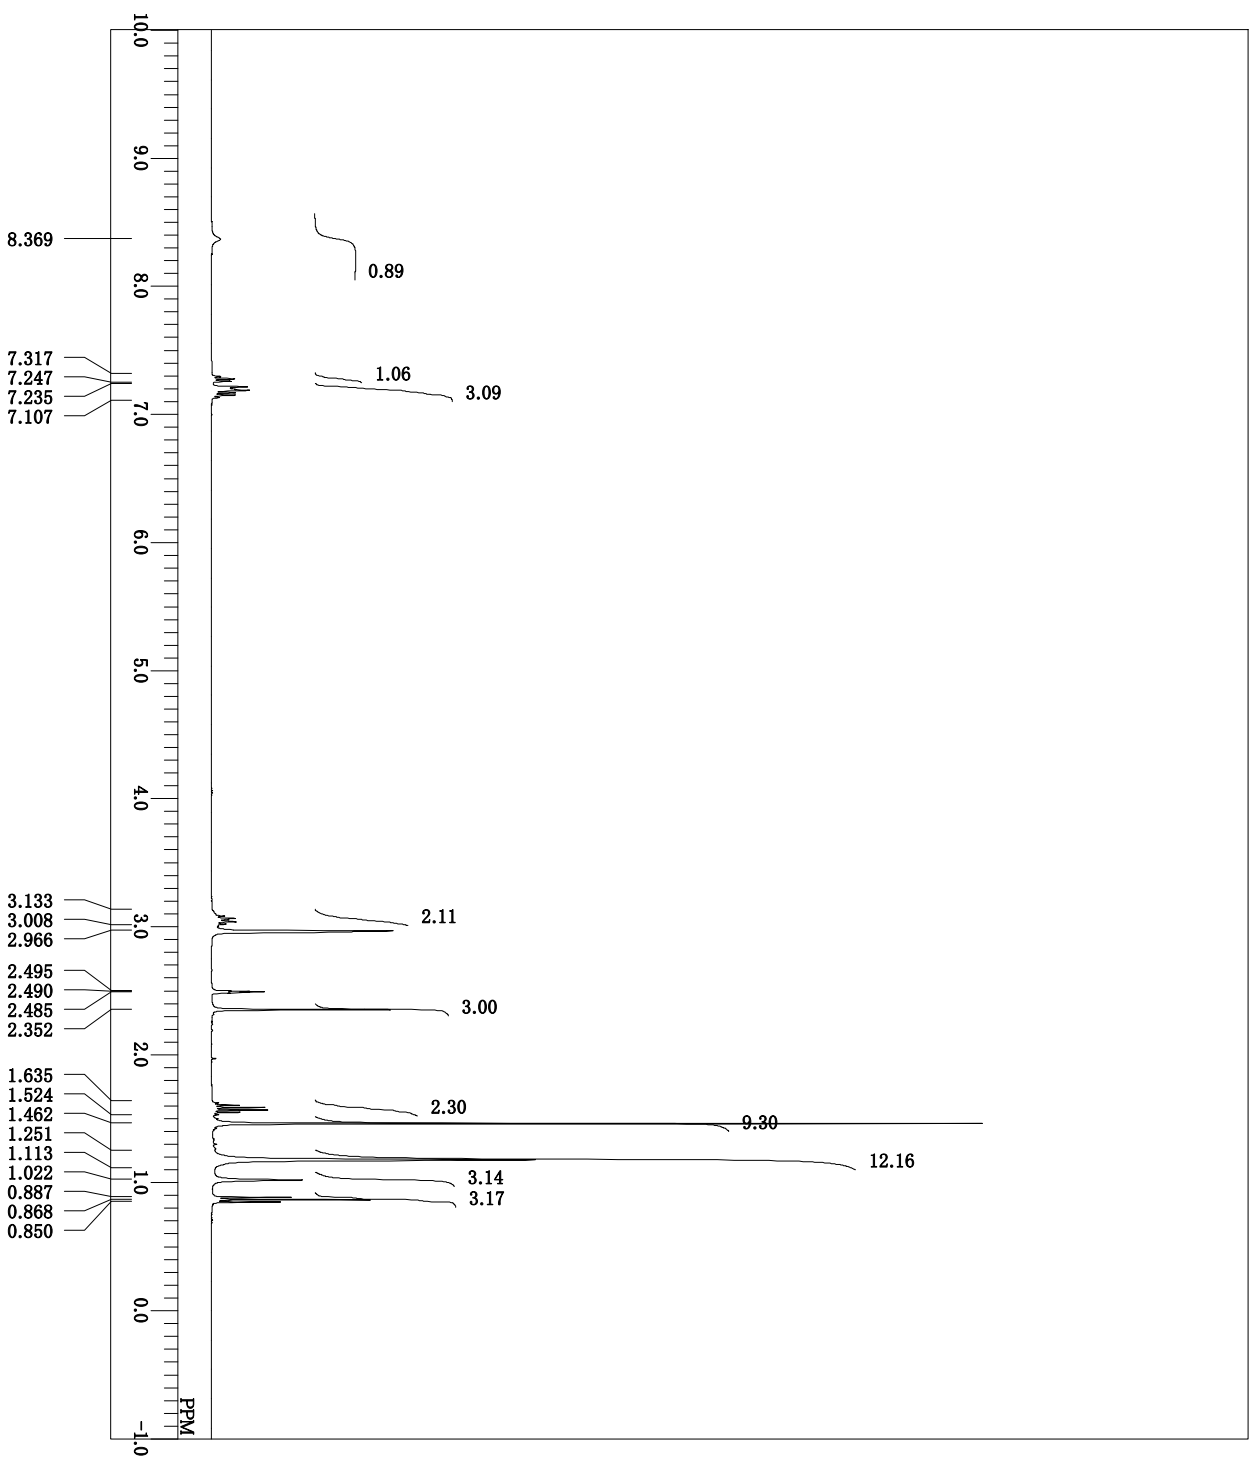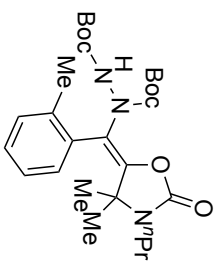

31A

DRILE  
 COMINT 20200222 0TolDBAD\_110deg\_Cart  
 DATIM single pulse decoupled gated NOE  
 2020-02-22 17:53:12  
 OBNUC 13C  
 EXMOD carbon, ipd  
 OBFREQ 99.55 MHz  
 OBFIN 5.13 KHz  
 POINT 0.98 Hz  
 32767  
 PREQU 31250.00 Hz  
 SCANS 256  
 ACQTM 1.0486 sec  
 PD 2.0000 sec  
 PW1 3.59 usec  
 IRNUC 1H  
 CTEMP 110.0 c  
 SLYNT DMSO  
 EXREF 39.50 ppm  
 BF 0.42 Hz  
 RGAIN 60



31A

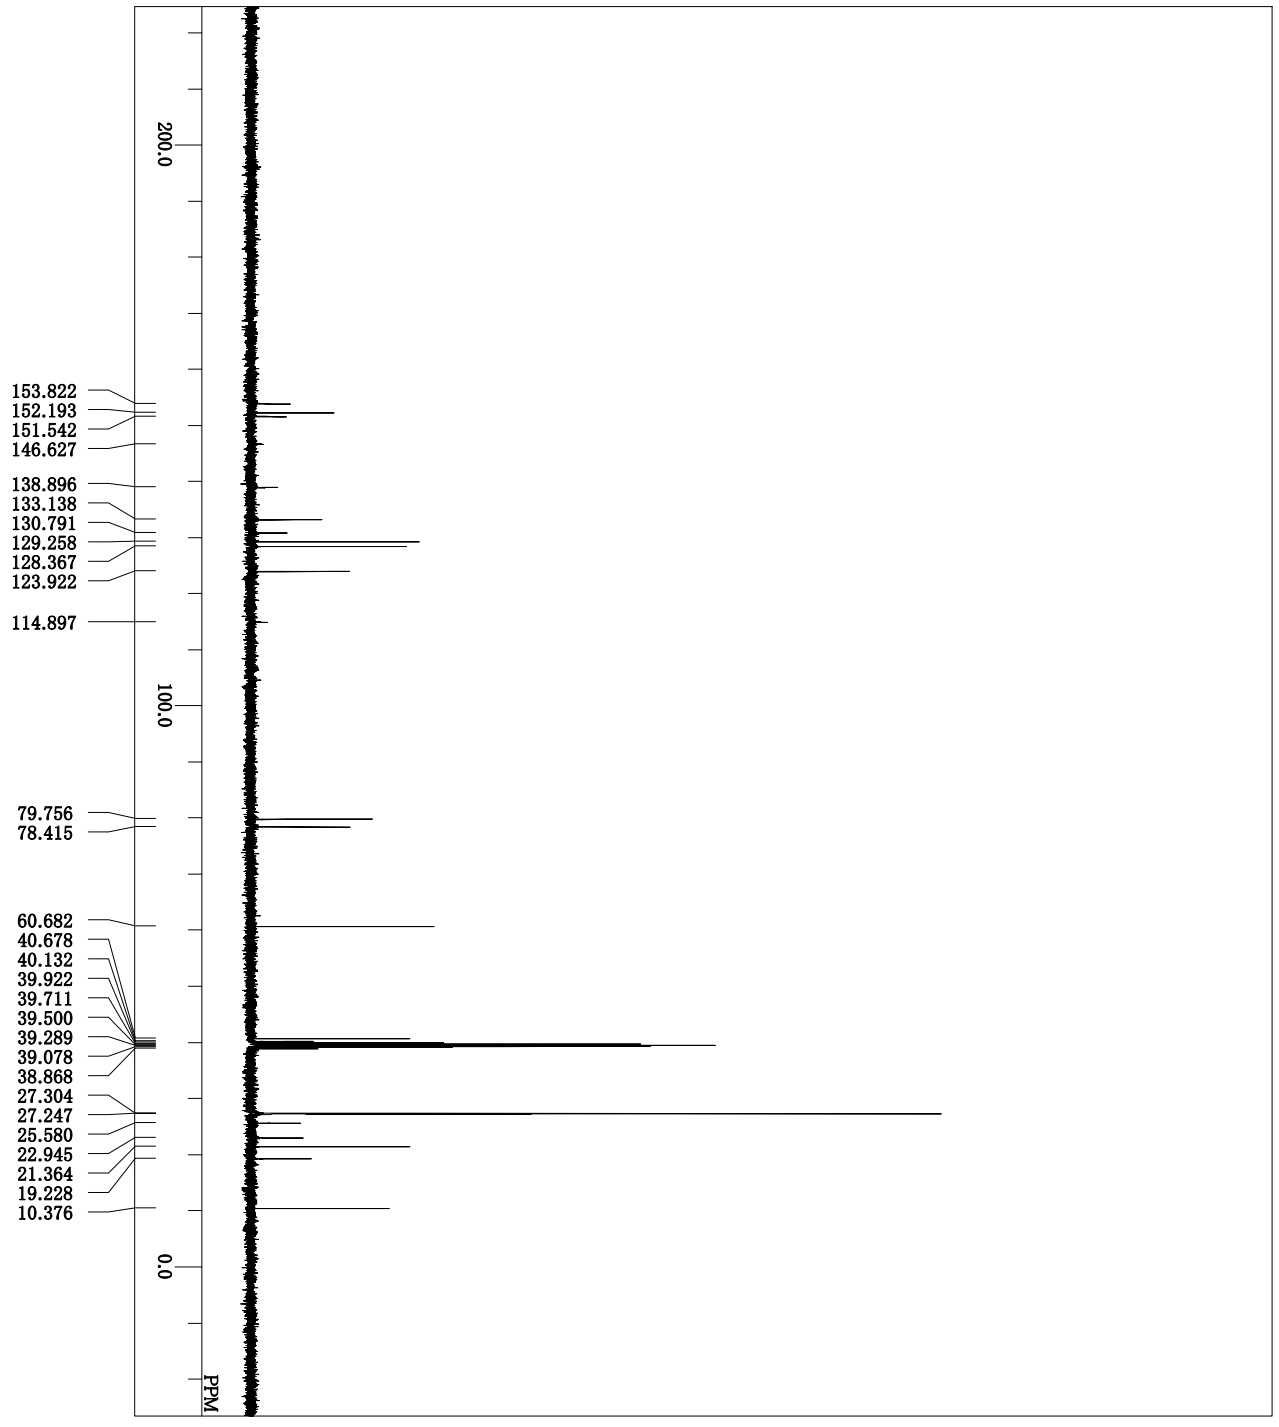

DRILE  
 COMINT  
 DATIM  
 OBNUC  
 EXMOD  
 OPRFQ  
 OBFIN  
 POINT  
 PREQU  
 SCANS  
 ACQTM  
 PD  
 PW1  
 IRNUC  
 CTENP  
 SLVNT  
 EXREF  
 BF  
 RGAIN

20200225 oToLDEAD\_110degProt  
 single-pulse  
 2020-02-25 15:09:53  
 1H  
 proton, 1p  
 395.88 MHz  
 6.28 KHz  
 0.87 Hz  
 13107  
 5938.24 Hz  
 8  
 2.2073 sec  
 5.0000 sec  
 3.14 usec  
 1H  
 110.0 c  
 DMSO  
 2.49 ppm  
 0.42 Hz  
 Z2

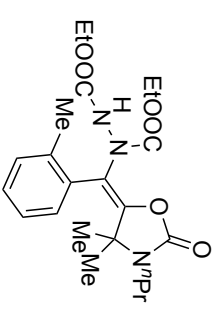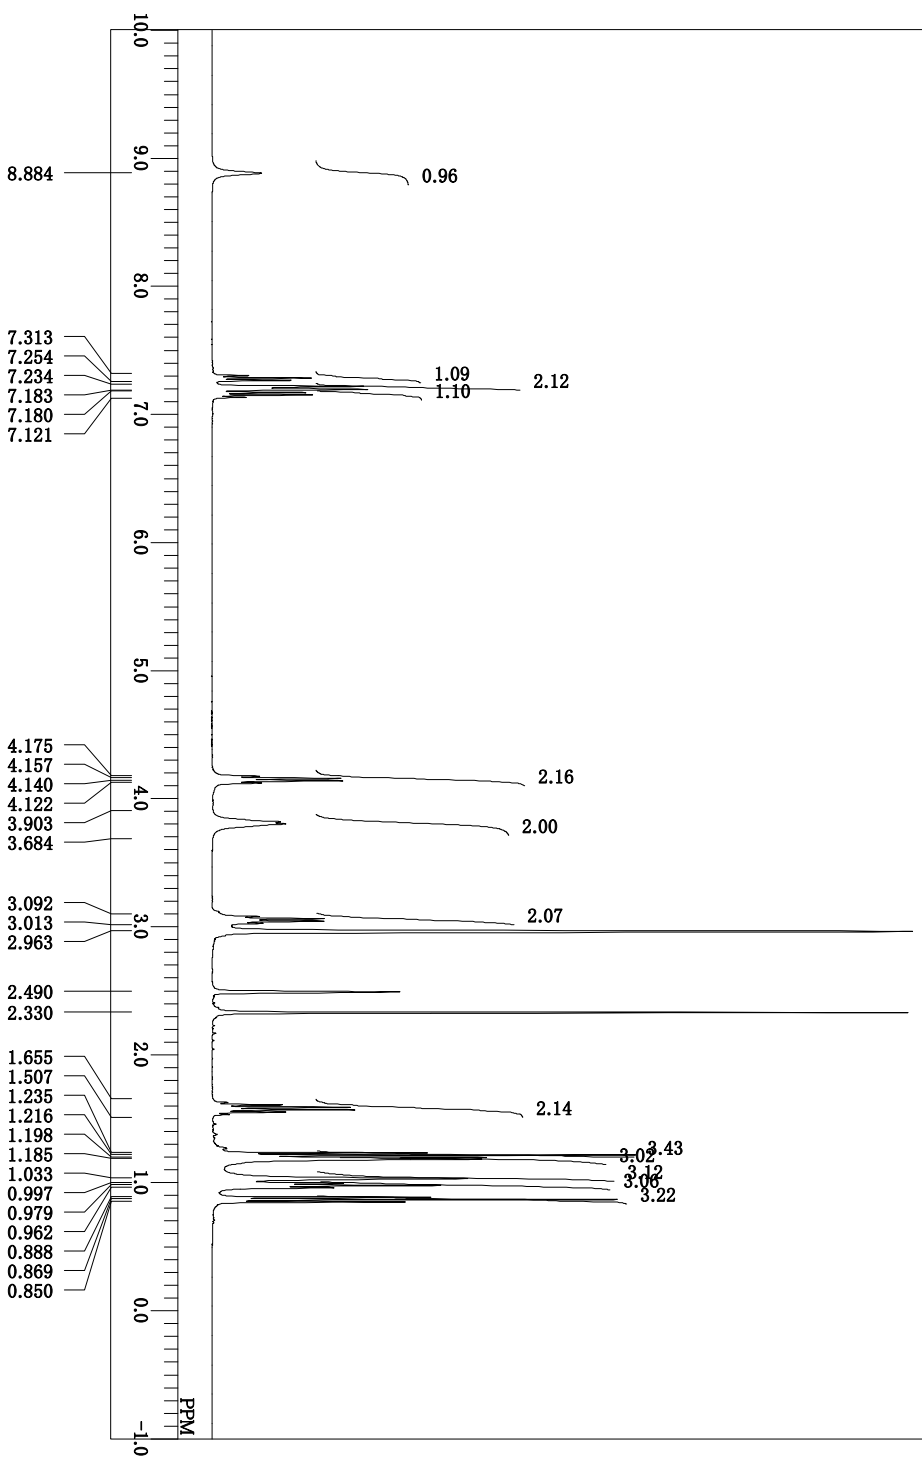

3FB



DRILE  
 COMINT 20200225 oTolDEAD\_110deg\_Cart  
 DATIM single pulse decoupled gated NOE  
 2020-02-25 15:13:03  
 13C  
 carbon, ipd  
 EXMOD 99.55 MHz  
 OBFREQ 5.13 KHz  
 OBFIN 0.98 Hz  
 POINT 32767  
 PREQU 31250.00 Hz  
 SCANS 256  
 ACQTM 1.0486 sec  
 PD 2.0000 sec  
 PW1 3.59 usec  
 IRNUC 1H  
 CTIMP 110.0 c  
 SLYNT DMSO  
 EXREF 39.50 ppm  
 BF 0.42 Hz  
 RGAIN 60

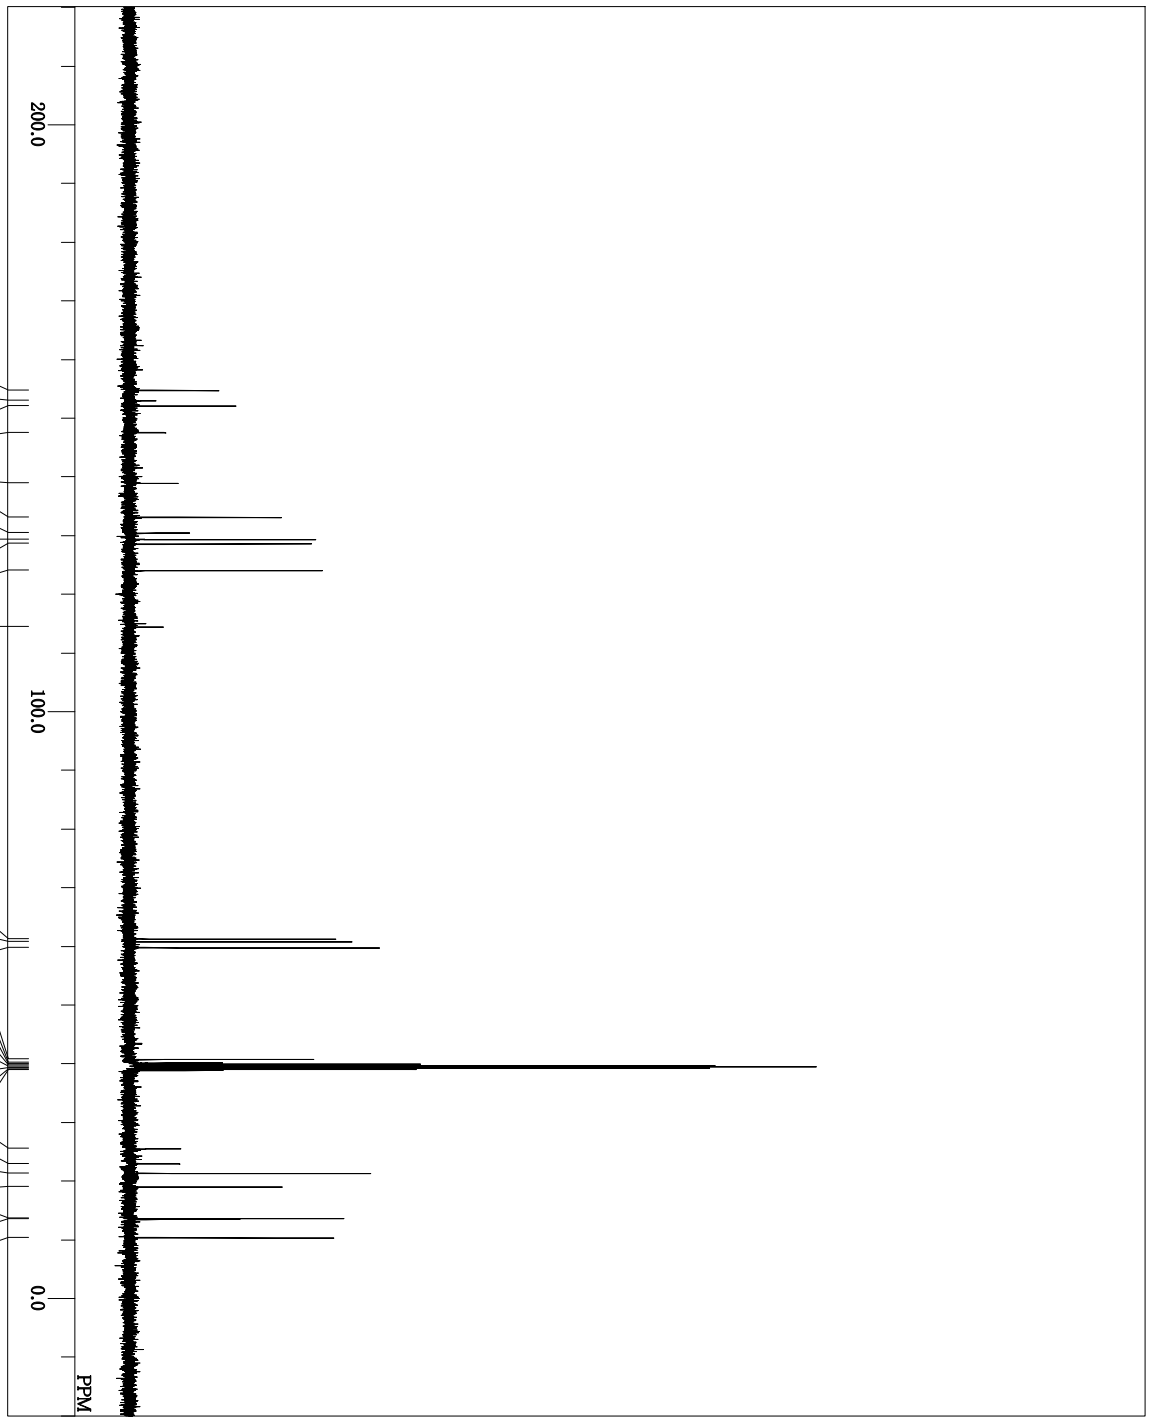

31B

DRILE 20200306\_1naph\_DBAD\_150deg\_Prc  
 COMINT single-pulse  
 DATIM 2020-03-06 15:09:16  
 OBNUC <sup>1</sup>H  
 EXMOD  
 OFPRQ proton, f1p  
 395.88 MHz  
 OBSET 6.28 KHz  
 OBFIN 0.87 Hz  
 POINT 13107  
 PREQU 5938.24 Hz  
 SCANS 8  
 ACQTM 2.2073 sec  
 PD 5.0000 sec  
 PW1 3.14 usec  
 IRNUC <sup>1</sup>H  
 CTEMP 150.0 c  
 SLYNT DMSO  
 EXREF 2.49 ppm  
 BF 0.42 Hz  
 RGAIN 26

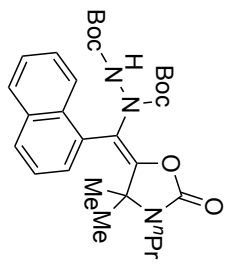

3gA

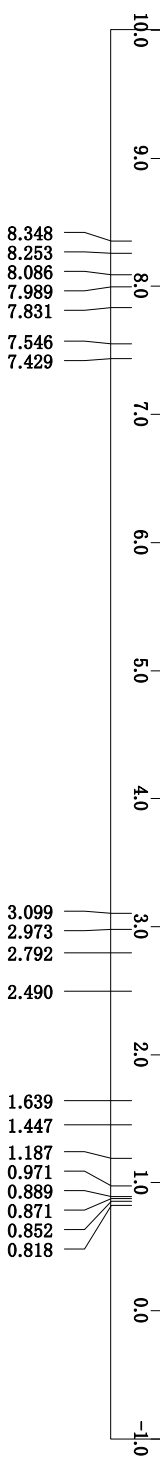

DRILE 20200306 Inaph\_DBAD\_150deg\_Ca  
 COMINT single pulse decoupled gated NOE  
 DATIM 2020-03-06 14:20:16  
 OBNUC 13C  
 EXMOD carbon, jnp  
 OBFREQ 99.55 MHz  
 OBSET 5.13 KHz  
 OBFIN 0.98 Hz  
 POINT 26214  
 PREQU 25000.00 Hz  
 SCANS 262  
 ACQTM 1.0486 sec  
 PD 2.0000 sec  
 PW1 3.59 usec  
 IRNUC 1H  
 CTEMP 150.0 c  
 SLYNT DMSO  
 EXREF 39.50 ppm  
 BF 0.42 Hz  
 RGAIN 60

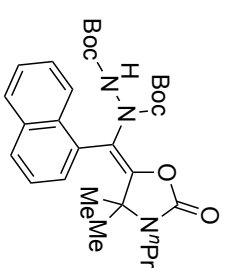

3gA

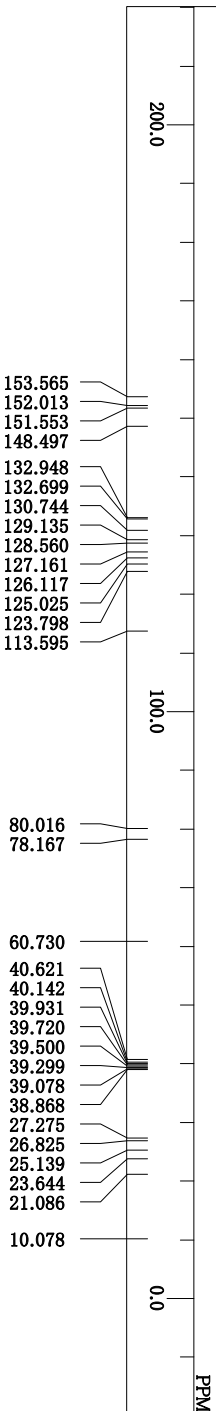

```

DR1E      1naph_DEAD_150deg_rev_Proton-1-
COM1NT    single_pulse
DAT1M     2019-12-10 15:34:16
OB1NUC    1H
EX1MOD    proton_f1p
OB1PRQ    395.88 MHz
OB1SET    6.28 KHz
OB1FN     13107
PR1EQU    5938.24 Hz
SC1ANS    8
AC1QTM    2.2073 sec
PD         5.0000 sec
PW1        3.14 usec
IR1NUC    1H
CT1EMP    150.0 c
SL1VNT    DMSO
EX1REF    2.49 ppm
BF         0.42 Hz
RG1AIN    26
  
```

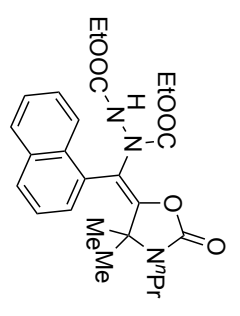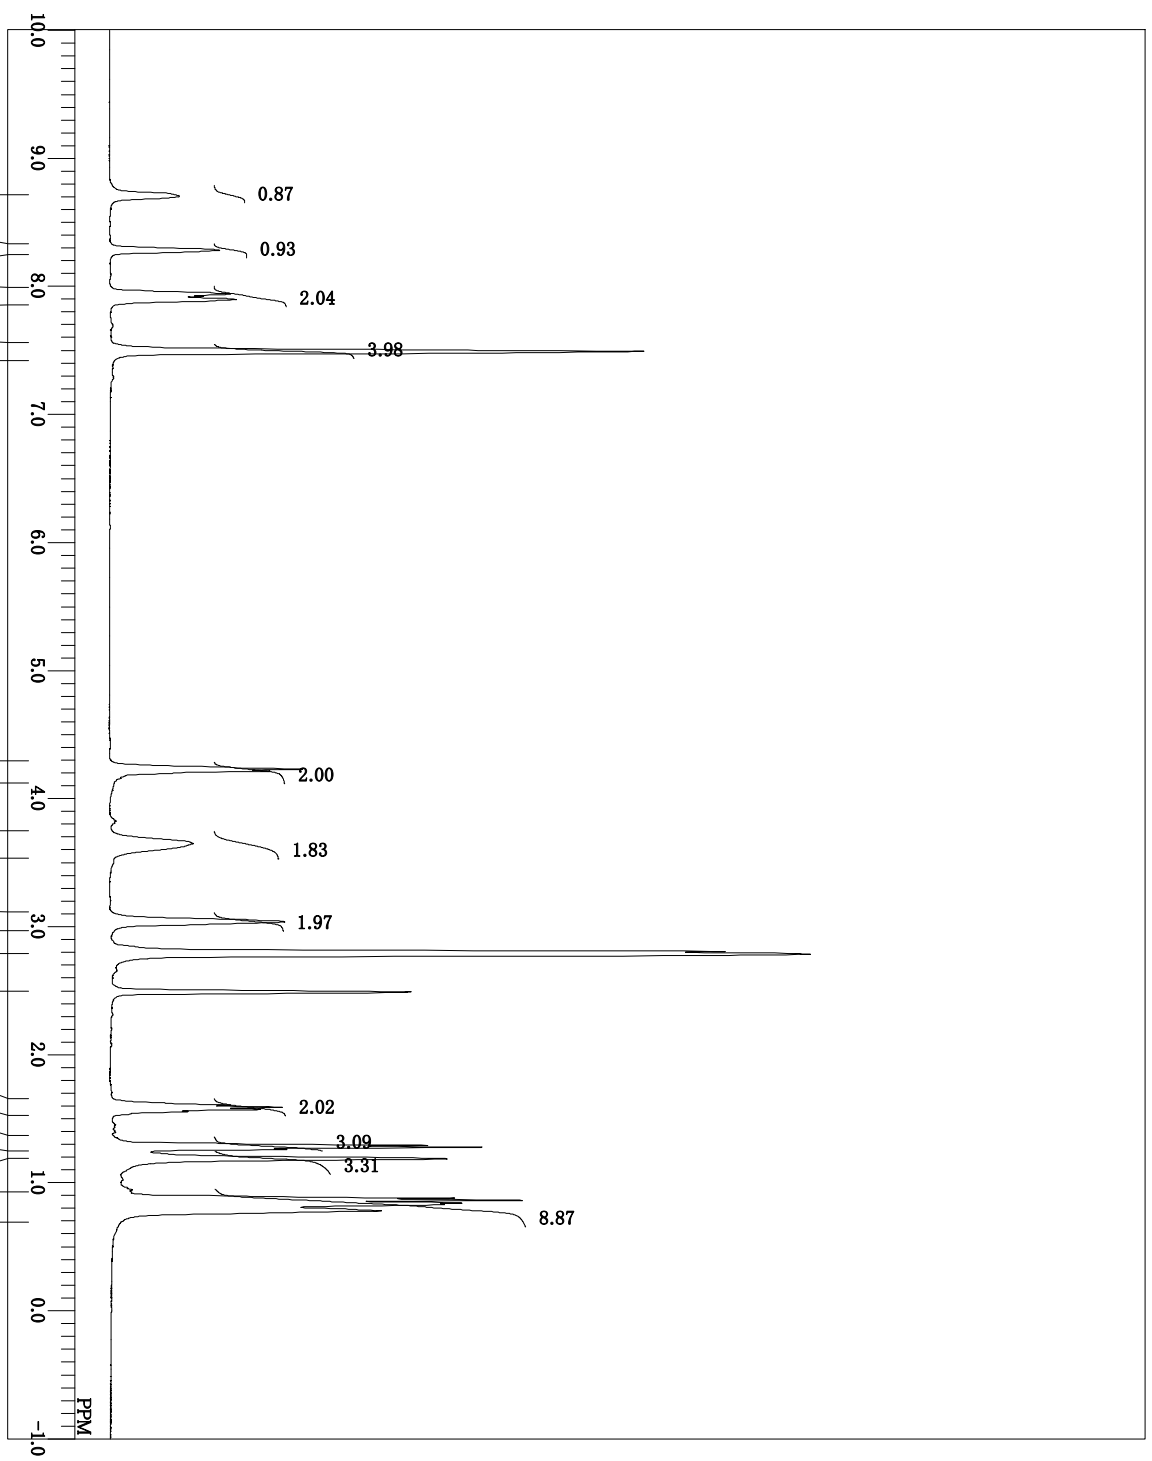

**3gB**

```

DRILE      1naph.DEAD.150deg.rev_Carbon-1
COMINT     single pulse decoupled gated NOE
DATIM      2019-12-10 15:37:26
OBNUC      13C
EXMOD      carbon_jrp
OBFREQ     99.55 MHz
OBSEF      5.13 KHz
OBFIN      0.98 Hz
POINT      26214
PREGU      25000.00 Hz
SCANS      1024
ACQTM      1.0486 sec
PD          2.0000 sec
PW1        3.59 usec
IRNUC      1H
CTEMP      150.0 c
SLVNT      DMSO
EXREF      39.50 ppm
BF          0.42 Hz
RGAIN      60

```

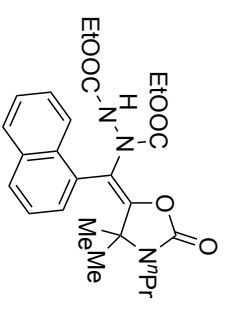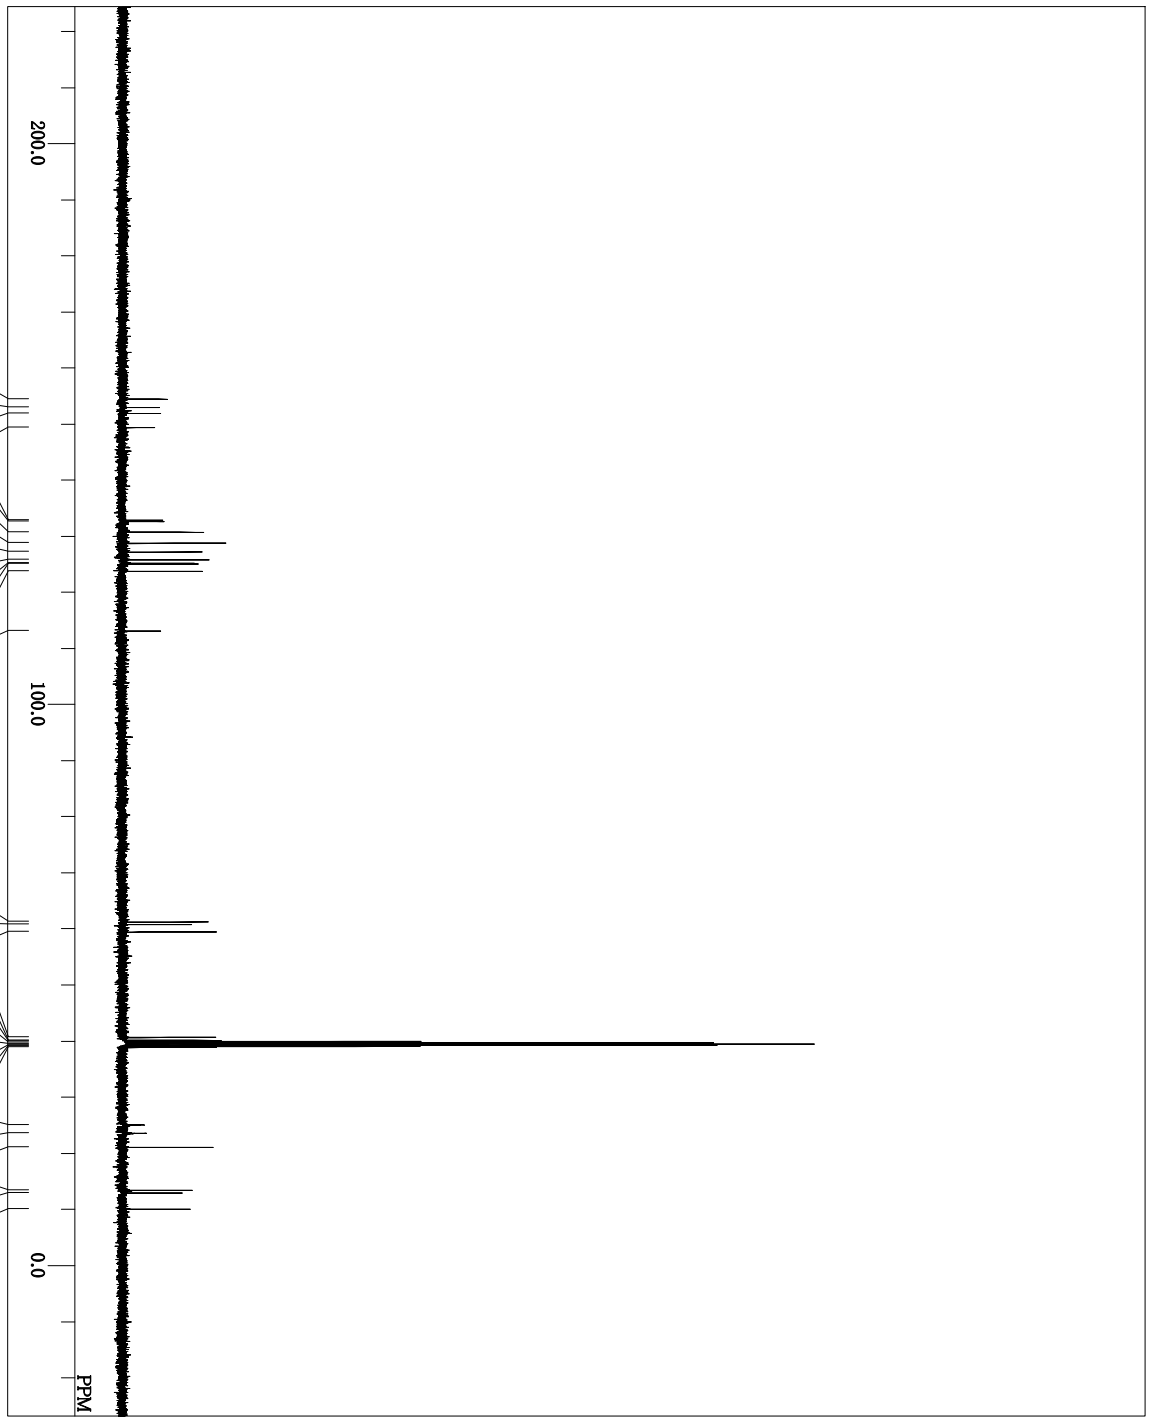

3gA

DRILE 20200229 NBn\_DBAD\_110deg.Proct  
 COMINT single pulse  
 DATIM 2020-02-29 16:59:21  
 OBNUC 1H  
 EXMOD proton, f1p  
 OBFREQ 395.88 MHz  
 OBSEF 6.28 KHz  
 OBFIN 0.87 Hz  
 POINT 16384  
 PREQU 7422.80 Hz  
 SCANS 8  
 ACQTM 2.2073 sec  
 PD 5.0000 sec  
 PW1 3.14 usec  
 IRNUC 1H  
 CTEMP 110.0 c  
 SLVNT DMSO  
 EXREF 2.49 ppm  
 BF 0.42 Hz  
 RGAIN 22

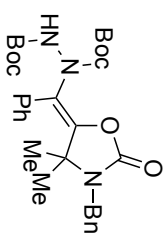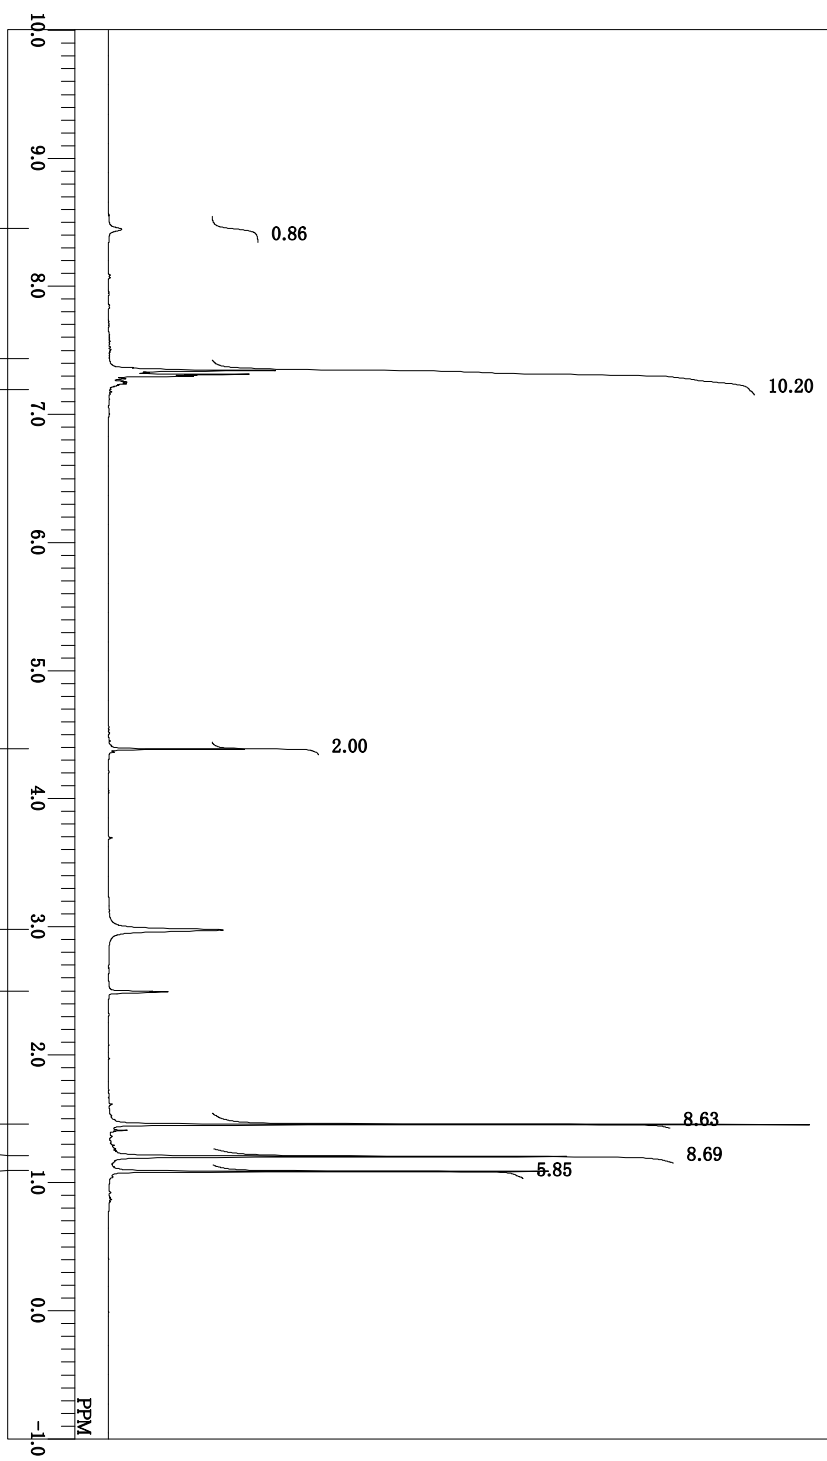

**3hA**

DRILE  
 COMINT 20200229 NBn\_DBAD\_110deg\_Carb  
 DATIM single pulse decoupled gated NOE  
 2020-02-29 17:02:36  
 13C  
 carbon\_jrp  
 EXMOD 99.55 MHz  
 OBFREQ 5.13 KHz  
 OBFIN 0.98 Hz  
 POINT 32767  
 PREQU 31250.00 Hz  
 SCANS 256  
 ACQTM 1.0486 sec  
 PD 2.0000 sec  
 PW1 3.59 usec  
 IRNUC 1H  
 CTEMP 110.0 c  
 SLYNT DMSO  
 EXREF 39.50 ppm  
 BF 0.42 Hz  
 RGAIN 60

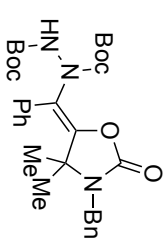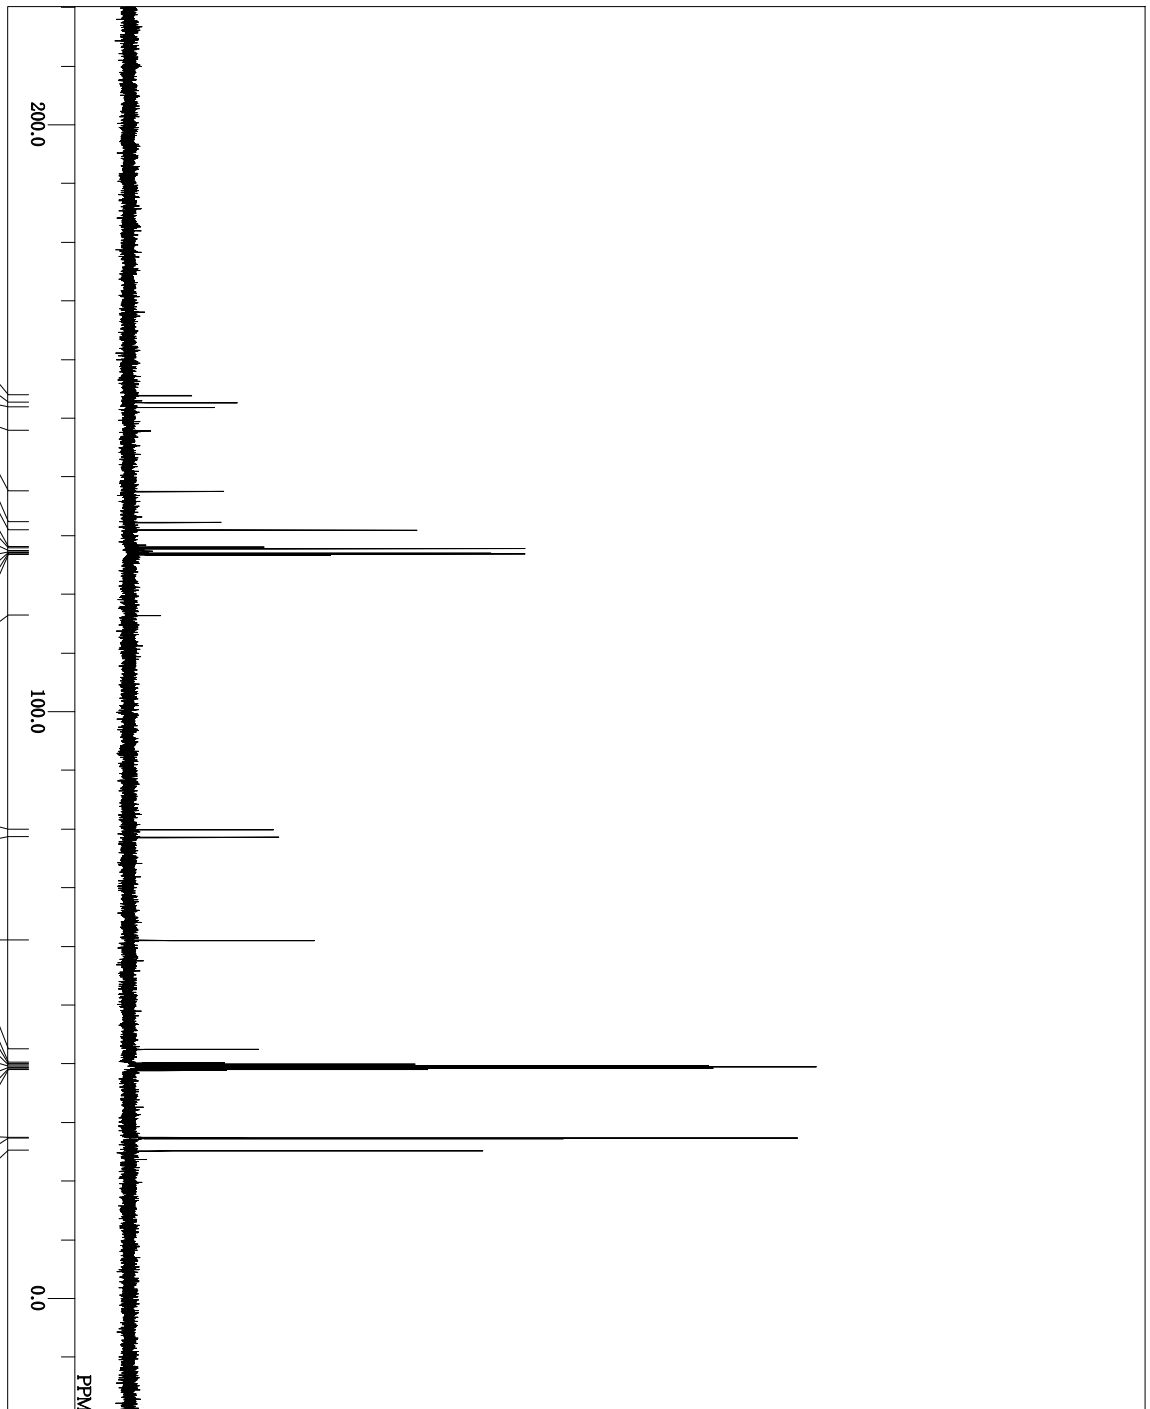

3hA

DR1LE NBrh\_DEAD\_110deg Proton-2-1.als  
 COMINT single\_pulse  
 DATIM 2019-12-05 16:42:35  
 OBNUC 1H  
 EXMOD proton\_frp  
 OBRFQ 395.88 MHz  
 OBSET 6.28 KHz  
 OBFIN 0.87 Hz  
 POINT 16384  
 PREQU 7422.80 Hz  
 SCANS 8  
 ACQTM 2.2073 sec  
 PD 5.0000 sec  
 PW1 3.14 usec  
 IRNUC 1H  
 CTIMP 110.0 c  
 SLVNT DMSO  
 EXREF 2.49 ppm  
 BF 0.42 Hz  
 RGAIN 24

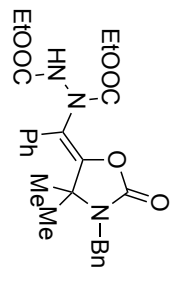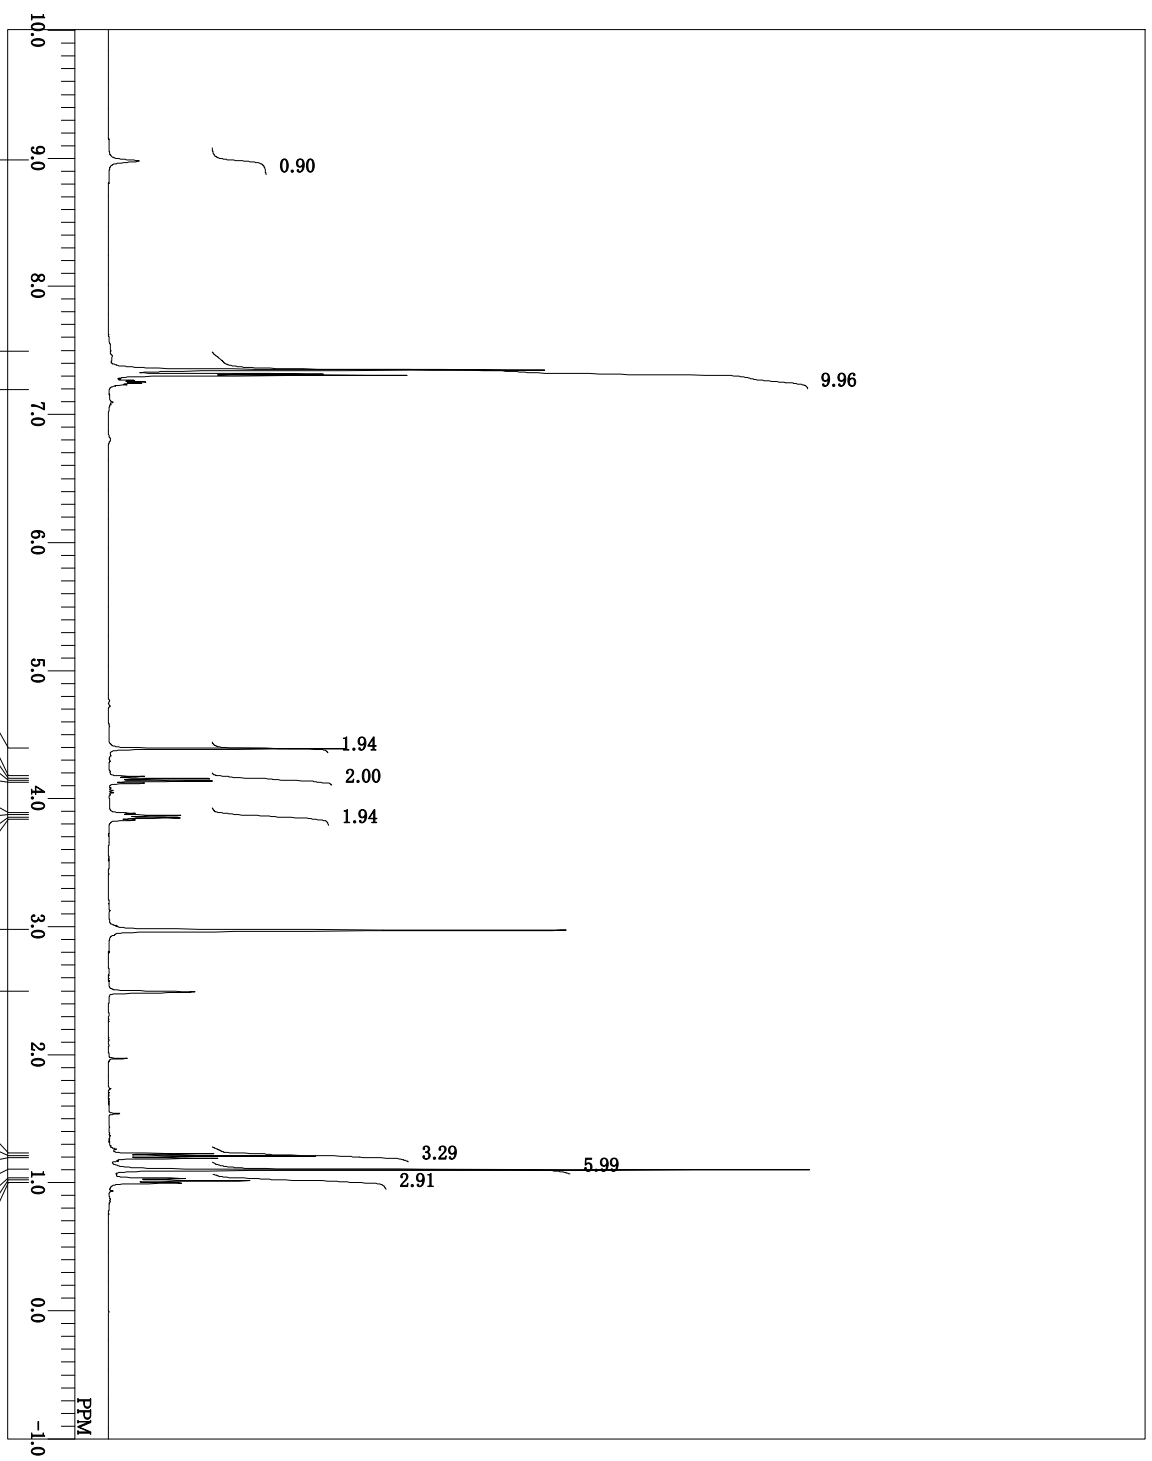

**3hB**



DR1E NBr<sub>2</sub>DEAD\_110deg Carbon-2-1, alk  
 COMINT single pulse decoupled gated NOE  
 DATIM 2019-12-05 16:45:50  
 OBNUC 13C  
 EXMOD carbon, jnp  
 OBFREQ 99.55 MHz  
 OBSET 5.13 KHz  
 OBFIN 0.98 Hz  
 POINT 32767  
 PREQU 31250.00 Hz  
 SCANS 256  
 ACQTM 1.0486 sec  
 PD 2.0000 sec  
 PW1 3.59 usec  
 IRNUC 1H  
 CTEMP 110.0 c  
 SLYNT DMSO  
 EXREF 39.50 ppm  
 BF 0.42 Hz  
 RGAIN 60

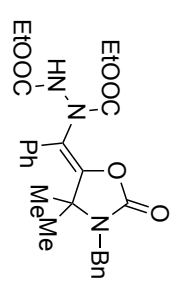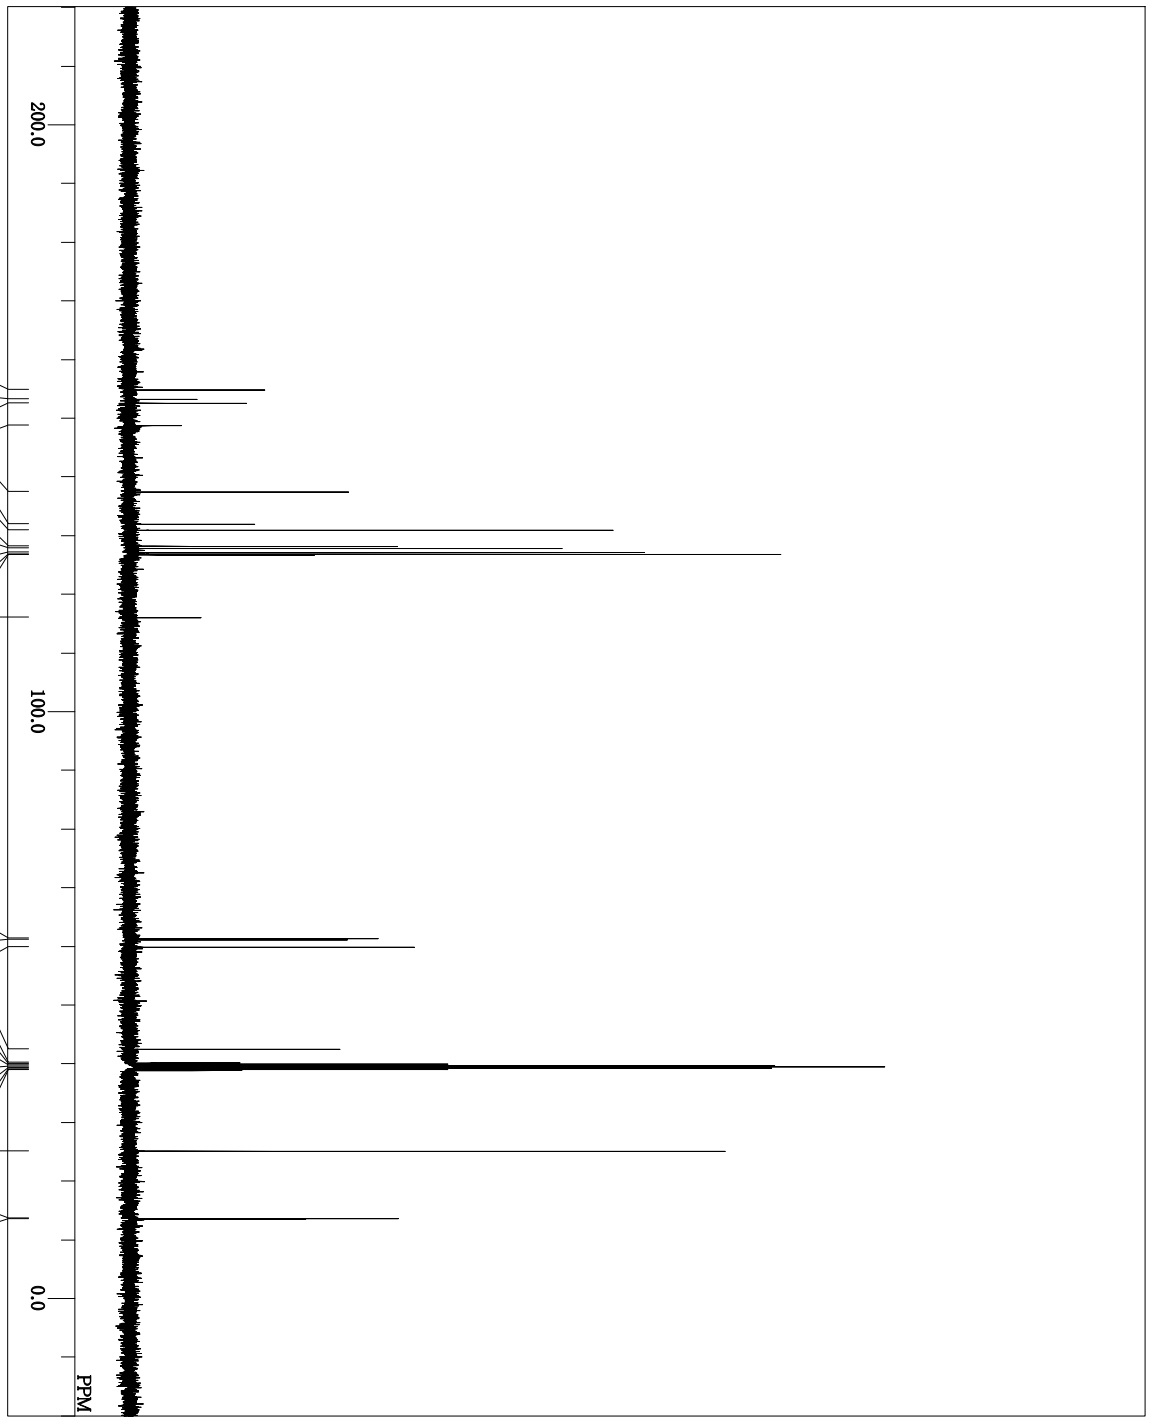

3hB

20200225 NPMB\_DBAD\_110deg.Pr  
 proton, 1p  
 395.88 MHz  
 6.28 KHz  
 0.87 Hz  
 16384  
 7422.80 Hz  
 8  
 2.2073 sec  
 5.0000 sec  
 3.14 usec  
 1H  
 110.0 c  
 DMSO  
 2.49 ppm  
 0.42 Hz  
 24  
 RGAIN

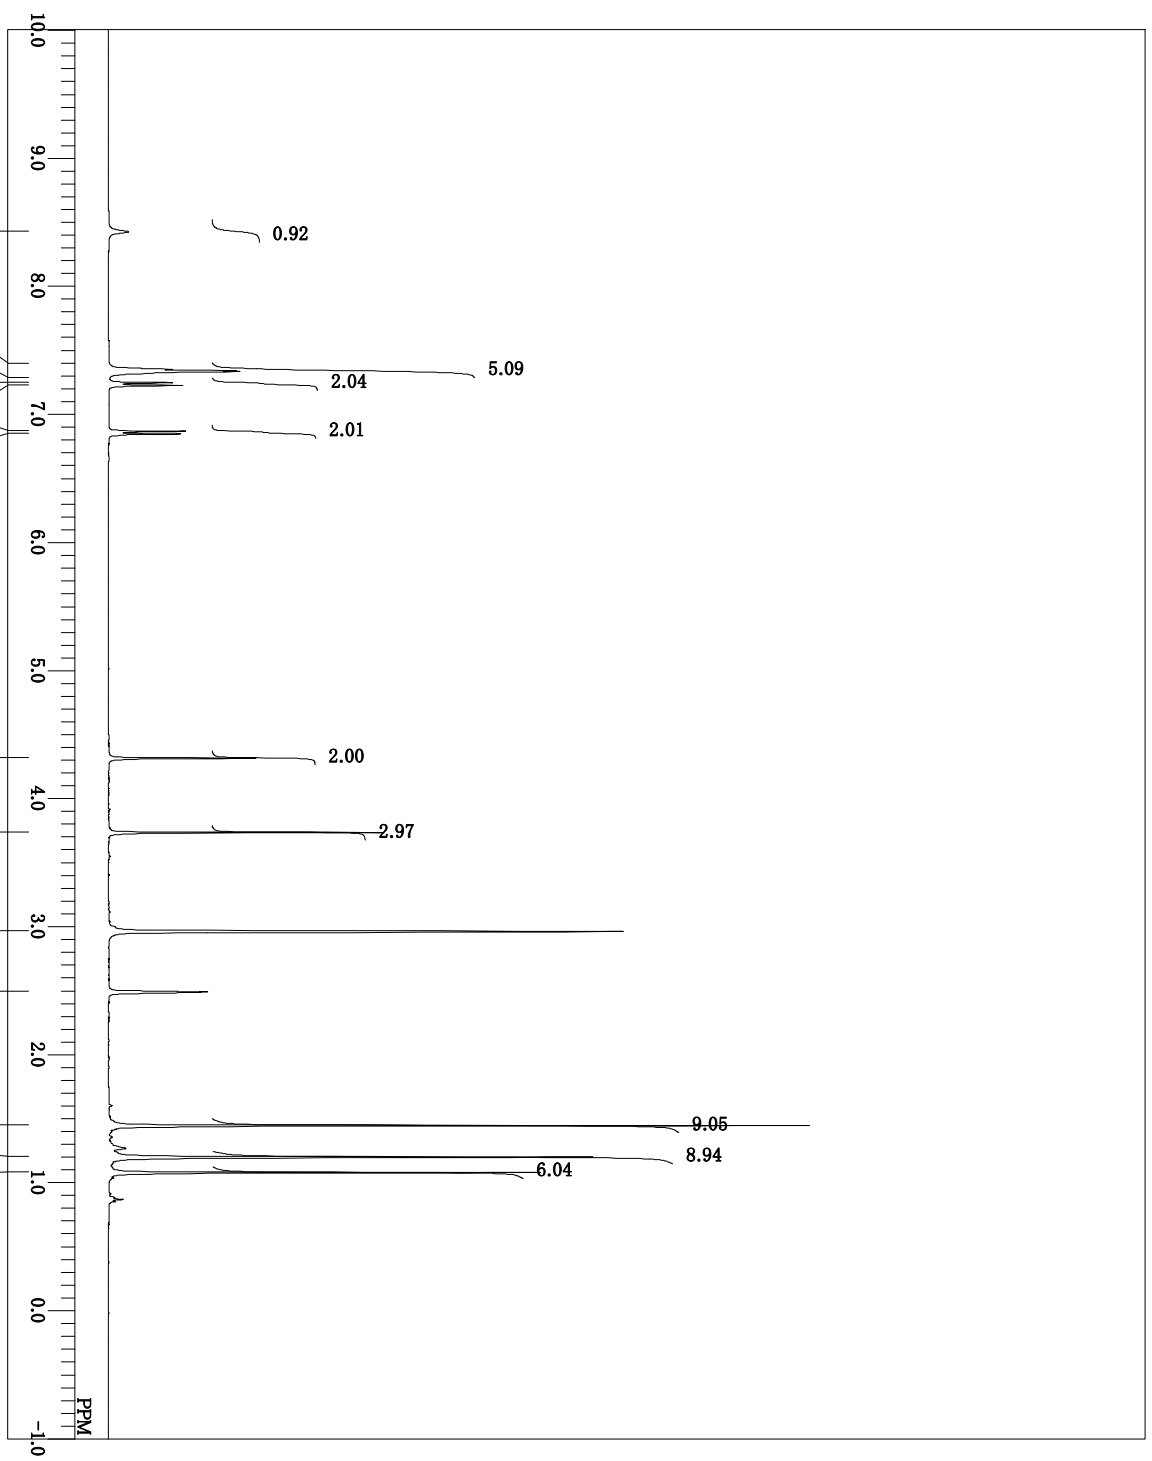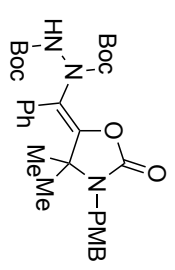

31A

20200225 NPMB\_DBAD\_110deg Ca  
 single pulse decoupled gated NOE  
 2020-02-25 15:36:29  
 13C  
 carbon, ipd  
 99.55 MHz  
 5.13 KHz  
 0.98 Hz  
 32767  
 31250.00 Hz  
 512  
 1.0486 sec  
 2.0000 sec  
 3.59 usec  
 PD  
 ACQTM  
 SCANS  
 512  
 1.0486 sec  
 2.0000 sec  
 3.59 usec  
 PW1  
 IRNUC  
 1H  
 110.0 c  
 DMSO  
 39.50 ppm  
 EXREF  
 0.42 Hz  
 BF  
 60  
 RGAIN

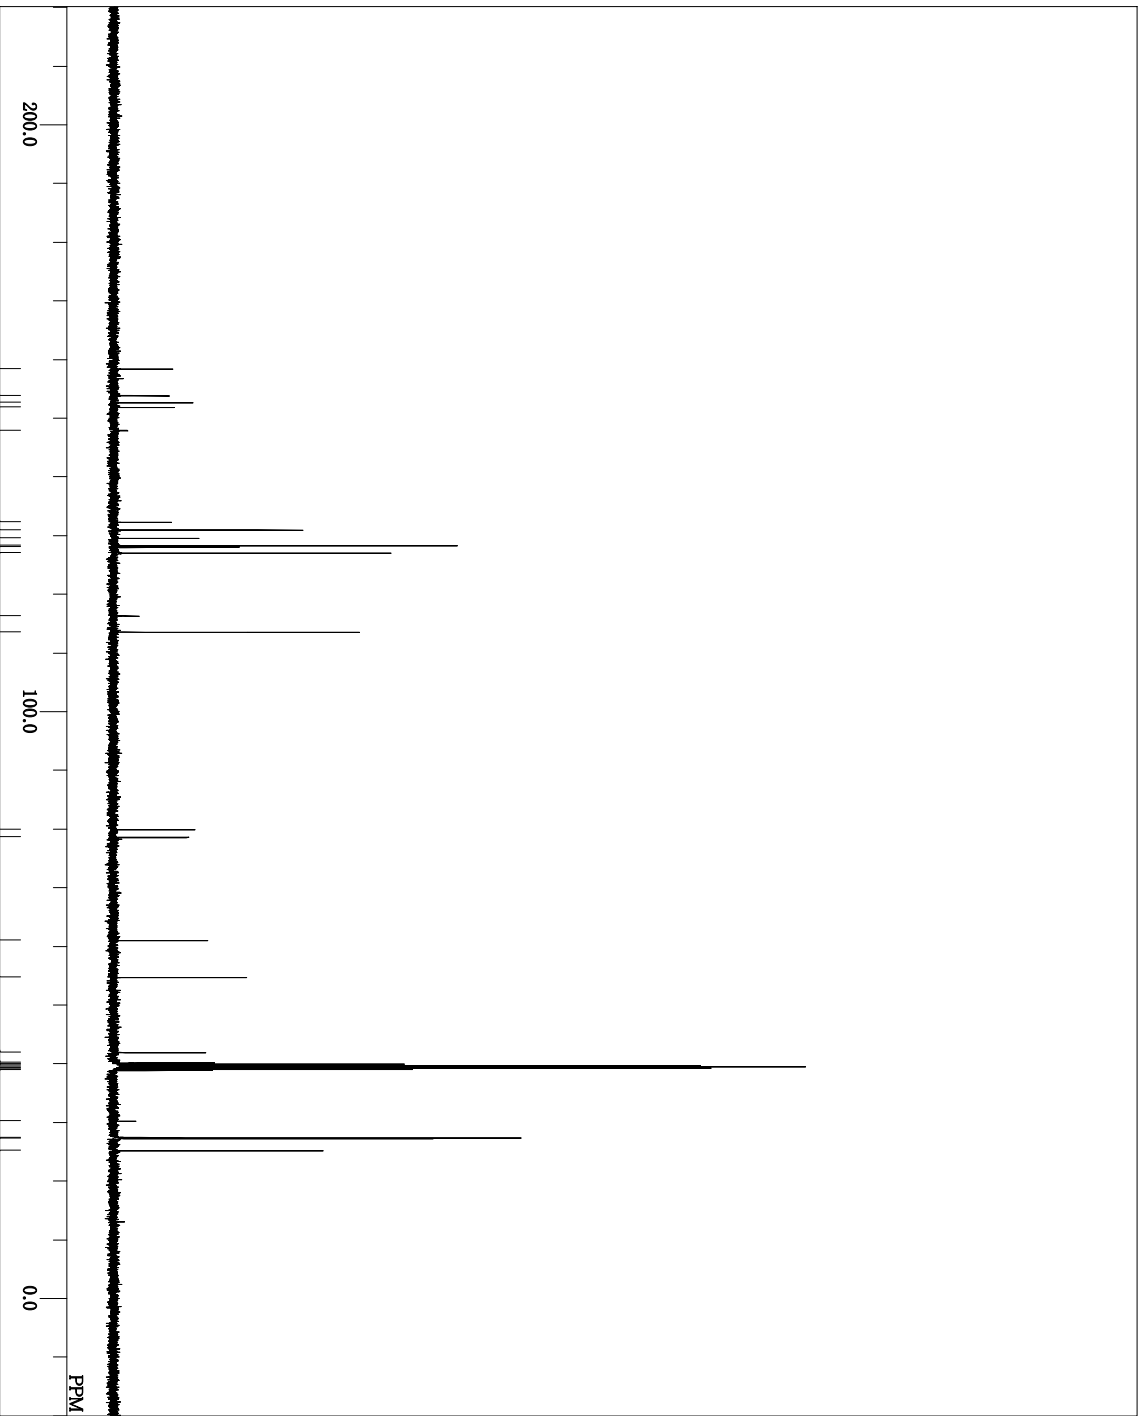

3IA

DR1LE NPMB\_DEAD\_110deg Proton-1-1.e  
 COMNT single\_pulse  
 DATIM 2019-12-25 19:39:27  
 OBNUC 1H  
 EXMOD  
 OFPRQ 395.88 MHz  
 OBSET 6.28 KHz  
 OFFIN 0.87 Hz  
 POINT 13107  
 FREQU 5938.24 Hz  
 SCANS 8  
 ACQTM 2.2073 sec  
 PD 5.0000 sec  
 PW1 3.14 usec  
 IRNUC 1H  
 CTEMP 110.0 c  
 SLVNT DMSO  
 EXREF 2.49 ppm  
 BF 0.42 Hz  
 RGAIN 22

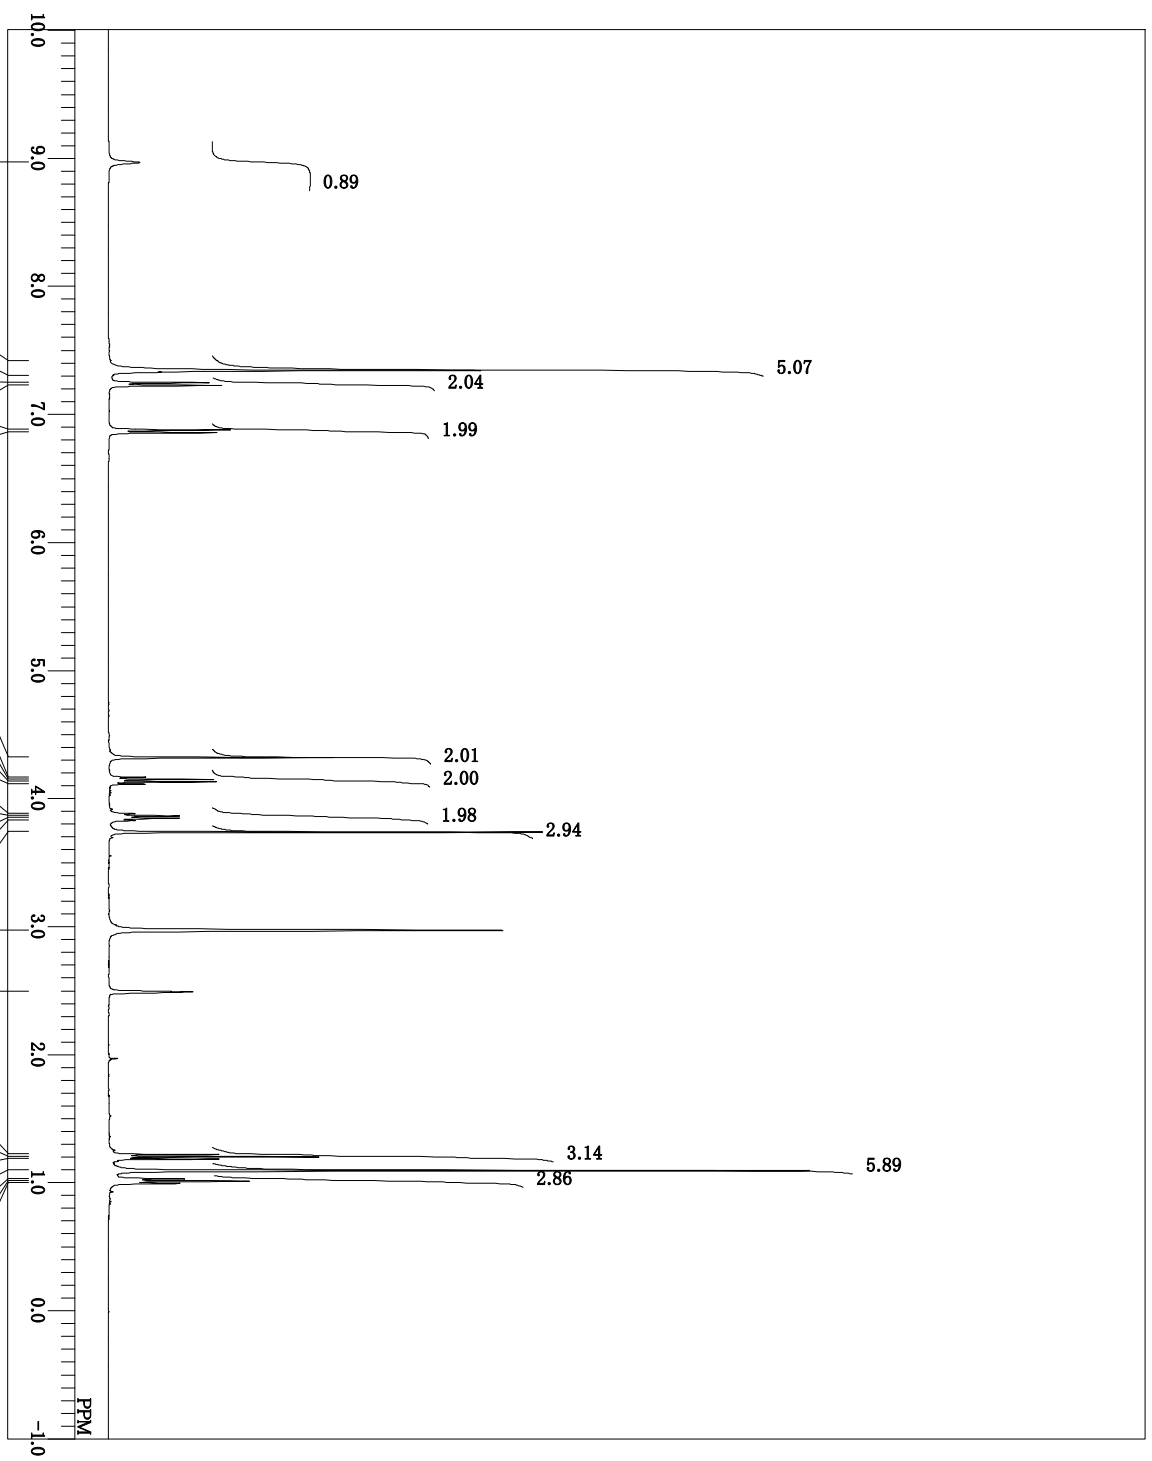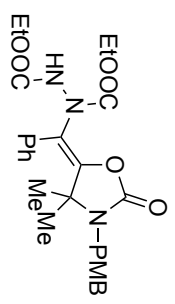

31B

DR1E NPMB\_DEAD\_110deg\_Carbon-1-1.  
 COMINT single pulse decoupled gated NOE  
 DATIM 2019-12-25 19:42:18  
 OBNUC 13C  
 EXMOD carbon\_jrp  
 OBPRQ 99.55 MHz  
 OBSET 5.13 KHz  
 OBFIN 0.98 Hz  
 POINT 32767  
 FREQU 31250.00 Hz  
 SCANS 129  
 ACQTM 1.0486 sec  
 PD 2.0000 sec  
 PW1 3.59 usec  
 IRNUC 1H  
 CTEMP 110.0 c  
 SLYNT DMSO  
 EXREF 39.50 ppm  
 BF 0.42 Hz  
 RGAIN 50

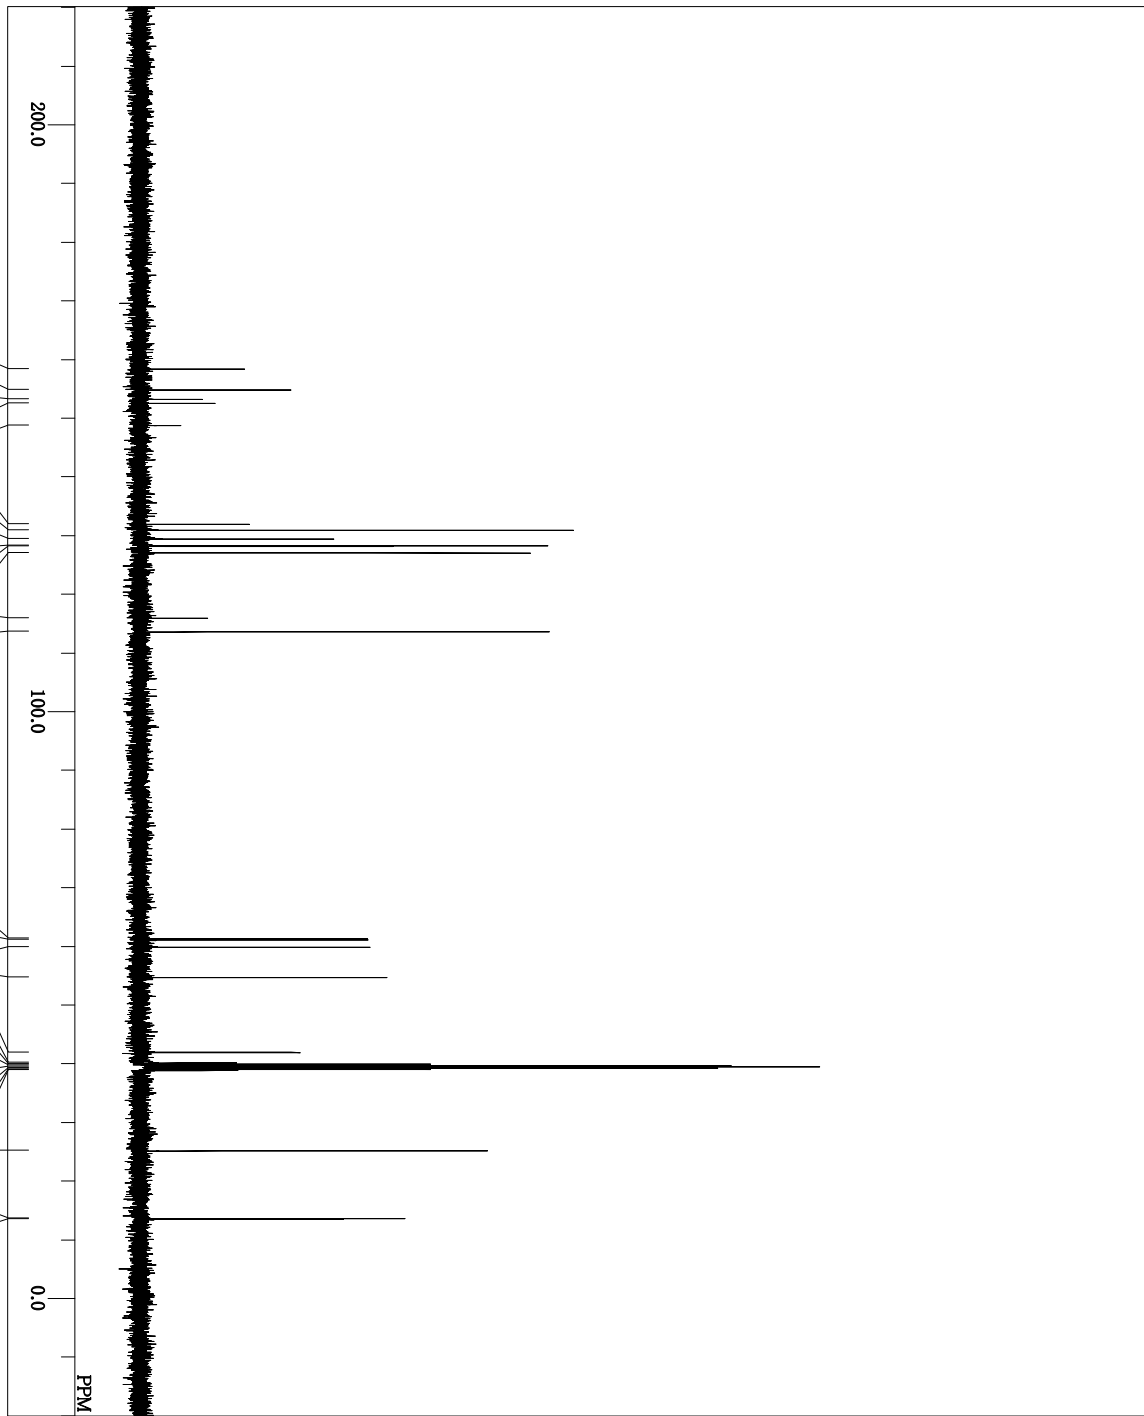

31B

DRILE  
 COMINT  
 DATIM  
 OBNUC  
 EXMOD  
 OBFRO  
 OBFIN  
 POINT  
 PREQU  
 SCANS  
 ACQTM  
 PD  
 PW1  
 IRNUC  
 CTENP  
 SLVNT  
 EXREF  
 BF  
 RGAIN

20200317 diethyl\_DBAD\_110deg\_Pr  
 single\_pulse  
 2020-03-17 21:26:15  
 1H  
 proton, 1p  
 395.88 MHz  
 6.28 KHz  
 0.87 Hz  
 16384  
 7422.80 Hz  
 8  
 2.2073 sec  
 5.0000 sec  
 3.14 usec  
 1H  
 110.0 c  
 DMSO  
 2.49 ppm  
 0.42 Hz  
 24

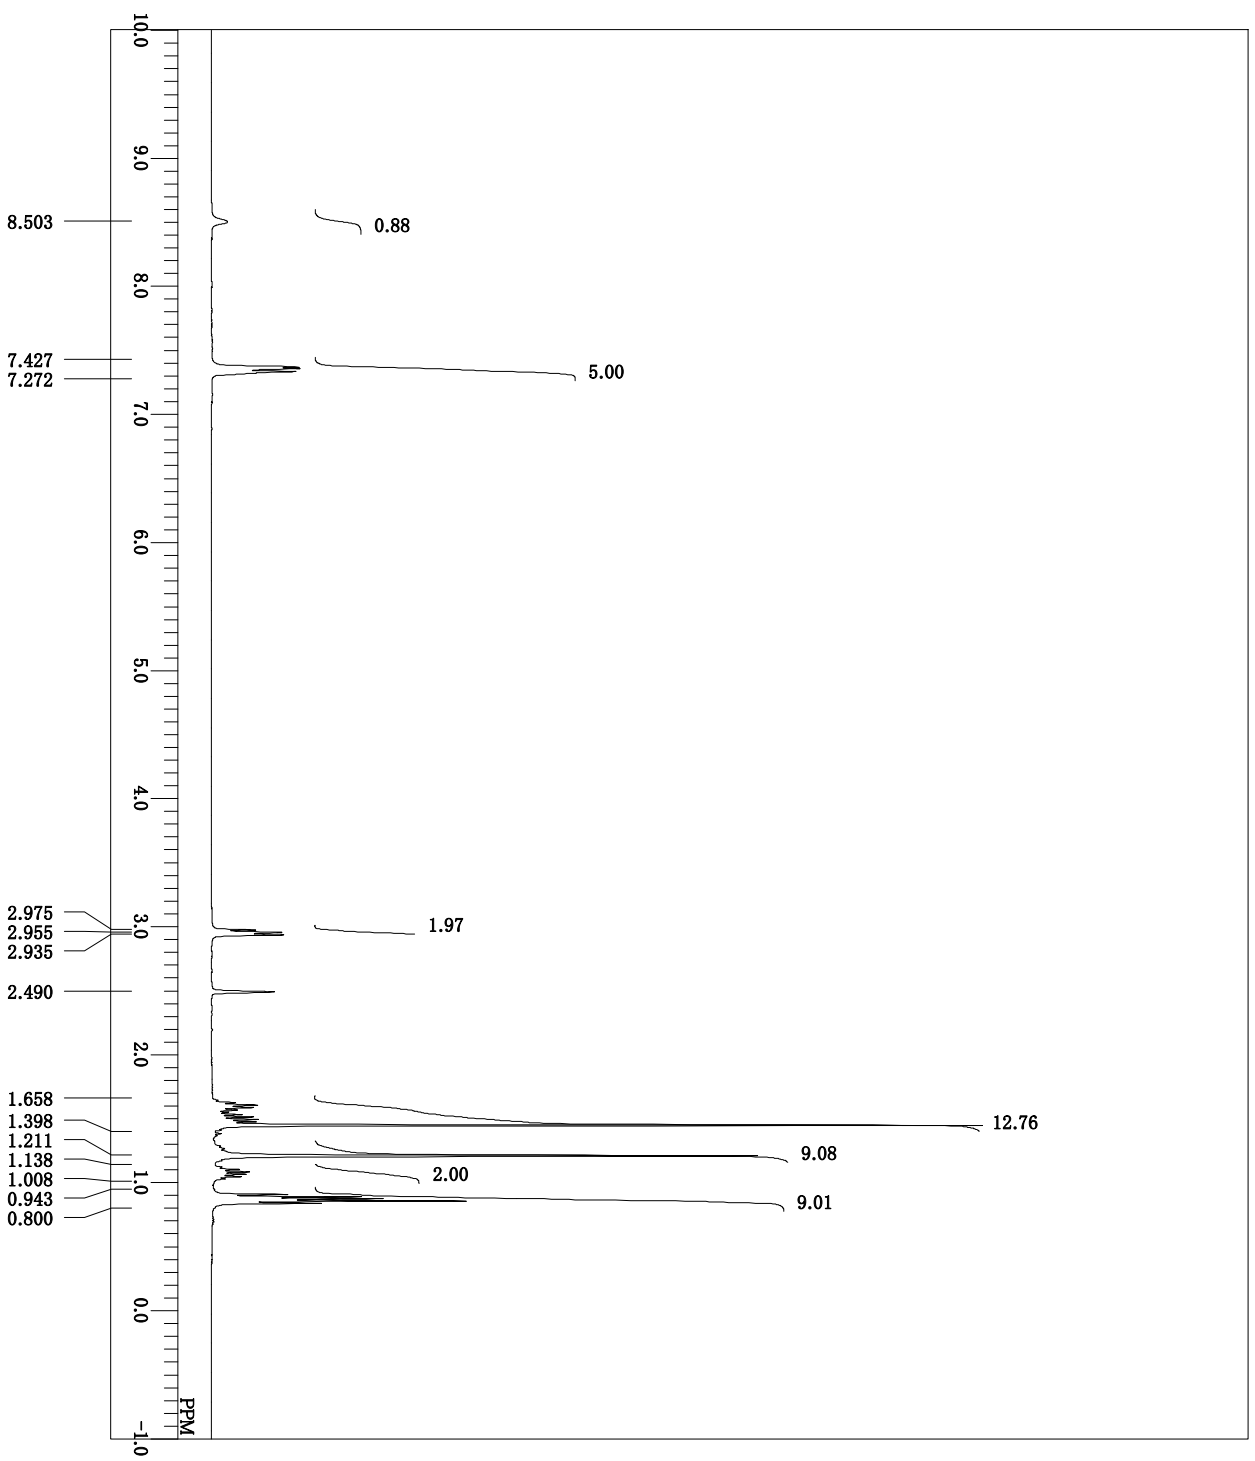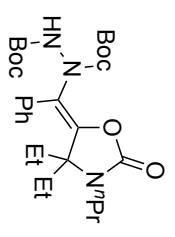

**3jA**

20200318\_diethyl\_DEAD\_110deg\_C  
 single pulse decoupled gated NOE  
 2020-03-18 10:14:52  
 13C  
 carbon, ipd  
 99.55 MHz  
 5.13 KHz  
 0.98 Hz  
 32767  
 31250.00 Hz  
 1024  
 1.0486 sec  
 2.0000 sec  
 3.59 usec  
 110.0 c  
 DMSO  
 39.50 ppm  
 0.42 Hz  
 60  
 IRNUC  
 CTMP  
 SLVNT  
 EXREF  
 BF  
 RGAIN

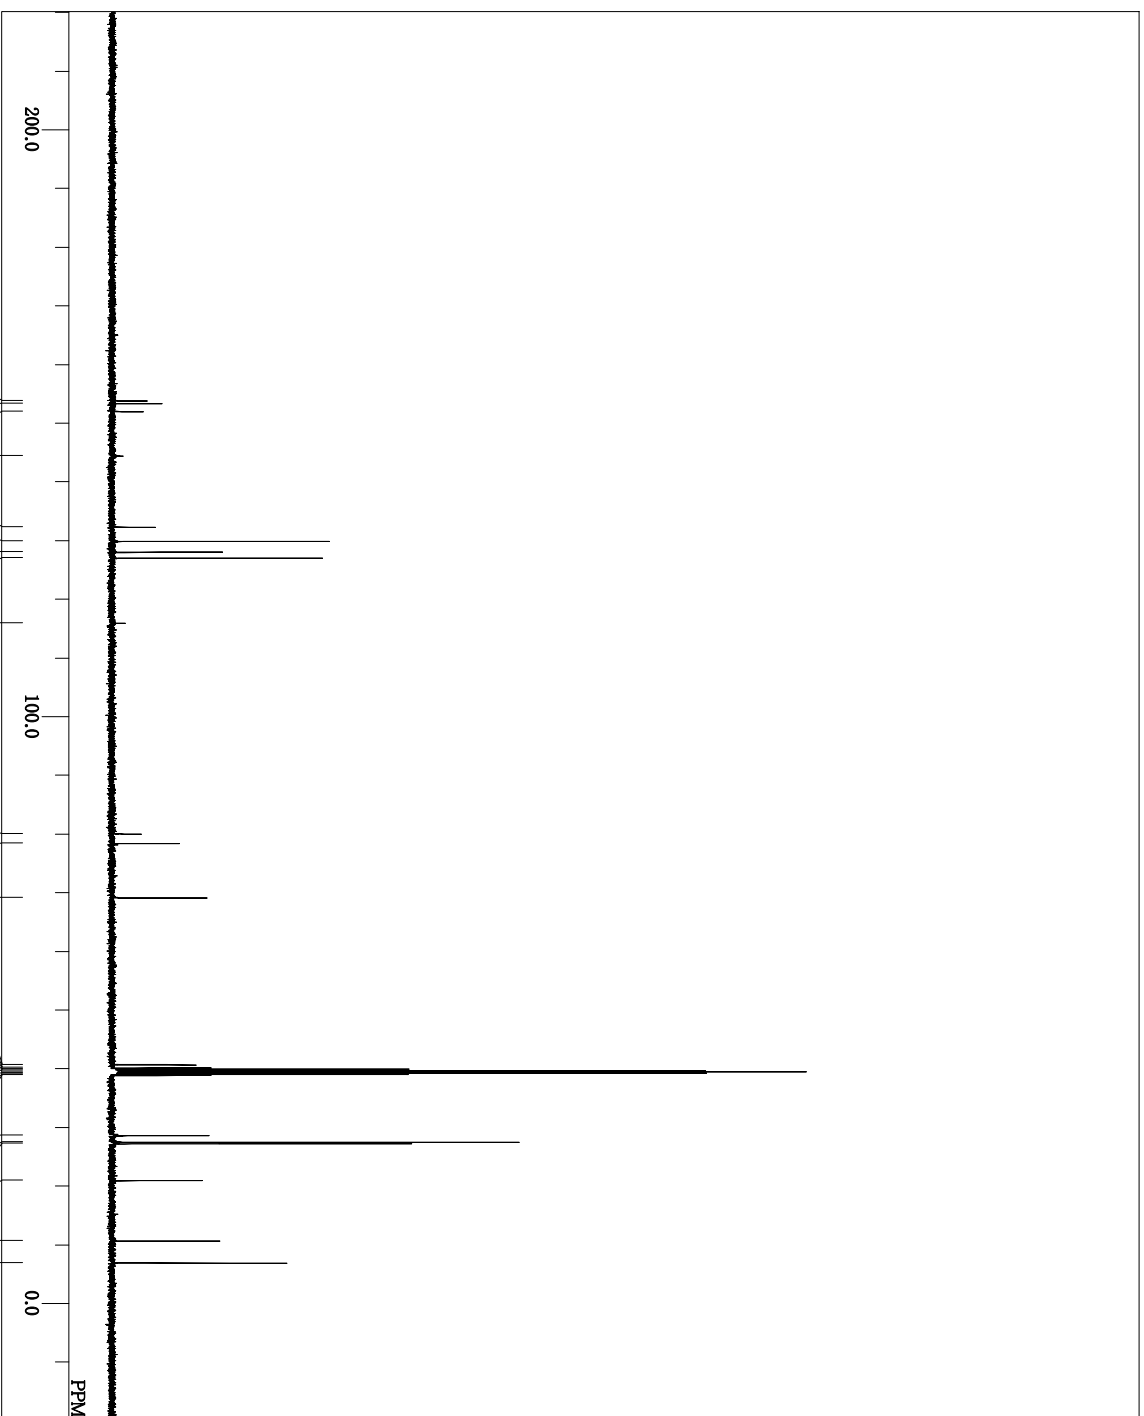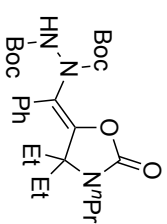

3jA

DRILE  
 COMINT  
 DATIM  
 OBNUC  
 EXMOD  
 OBFRO  
 OBFIN  
 POINT  
 PREQU  
 SCANS  
 ACQTM  
 PD  
 PW1  
 IRNUC  
 CTIMP  
 SLVNT  
 EXREF  
 BF  
 RGAIN

20200323 Et\_DEAD\_75deg\_Proton-  
 single pulse  
 2020-03-23 14:26:08  
 1H  
 proton, f1p  
 395.88 MHz  
 6.28 KHz  
 0.87 Hz  
 13107  
 5938.24 Hz  
 8  
 2.2073 sec  
 5.0000 sec  
 3.14 usec  
 1H  
 75.0 c  
 CD3CN  
 1.93 ppm  
 0.42 Hz  
 30

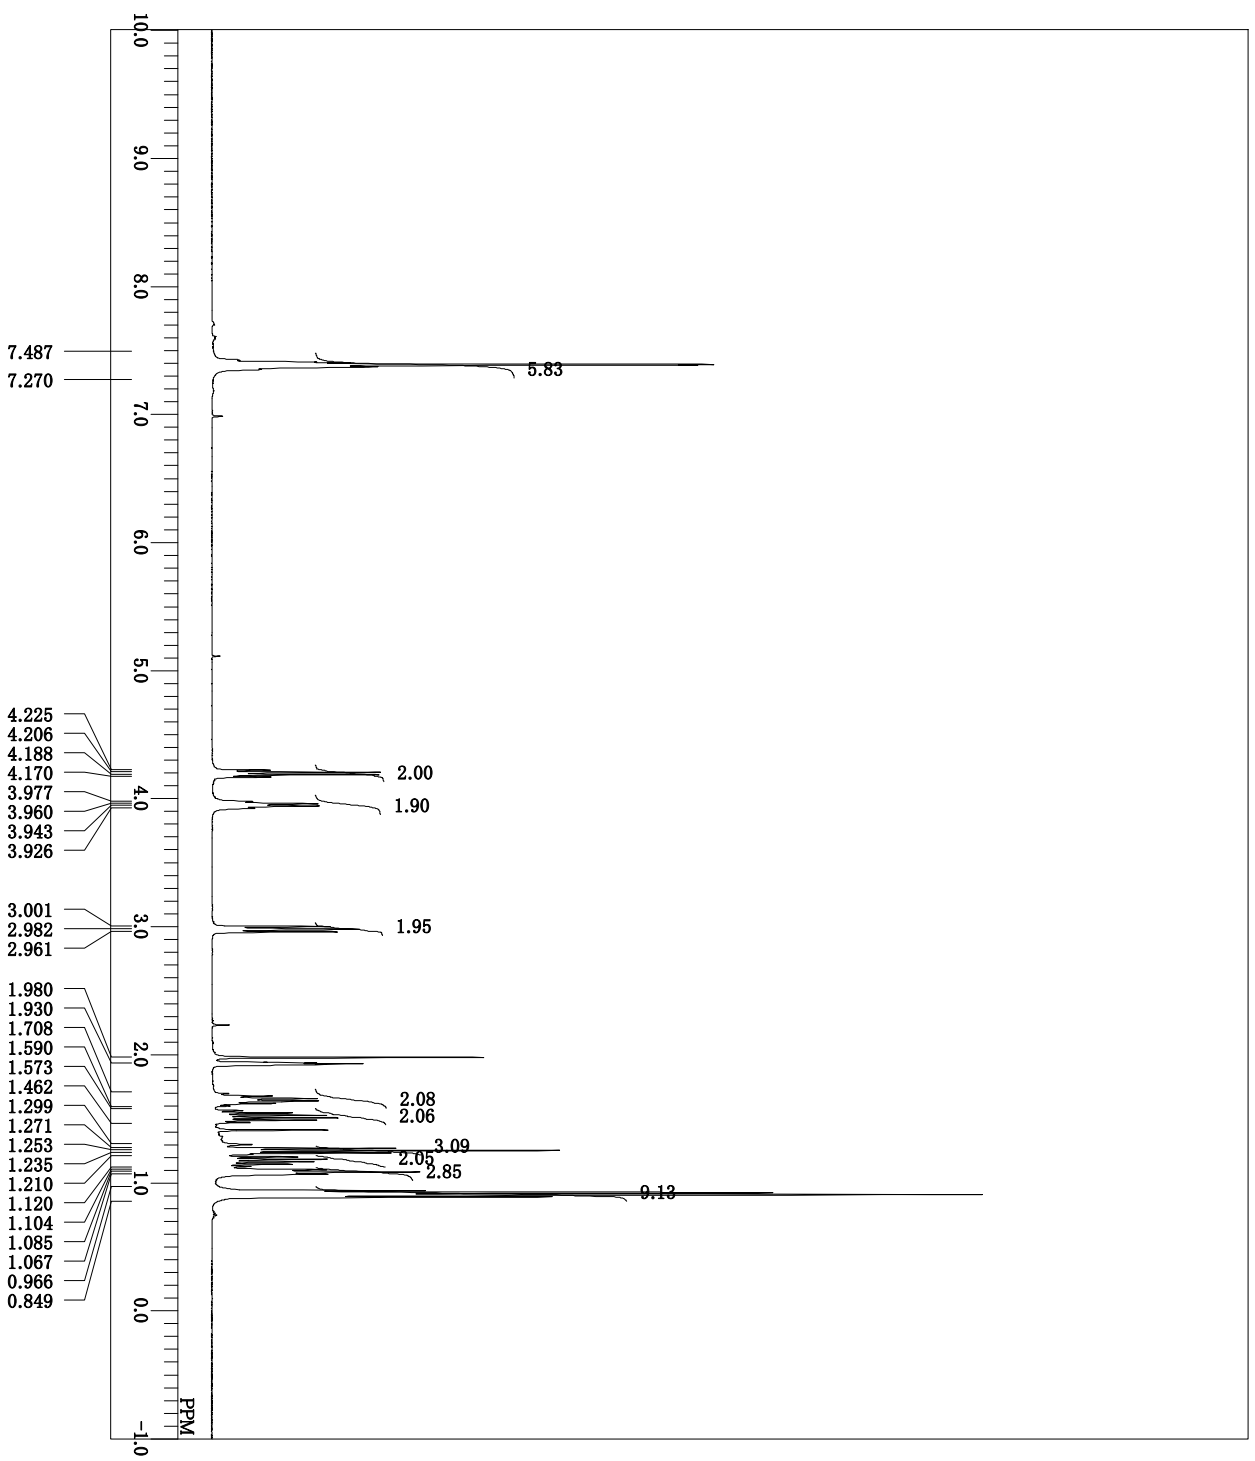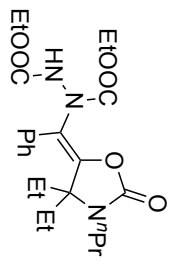

3JB



DRILE  
 COMINT diethylDEAD\_110deg\_Carbon-2-1.  
 single pulse decoupled gated NOE  
 DATIM 2019-12-12 09:51:24  
 OBNUC 13C  
 EXMOD carbon\_1p  
 OBFREQ 99.55 MHz  
 OBSEF 5.13 KHz  
 OBFIN 0.98 Hz  
 POINT 32767  
 PREQU 31250.00 Hz  
 SCANS 356  
 ACQTM 1.0486 sec  
 PD 2.0000 sec  
 PW1 3.59 usec  
 IRNUC 1H  
 CTEMP 110.0 c  
 SLYNT DMSO  
 EXREF 39.50 ppm  
 BF 0.42 Hz  
 RGAIN 60

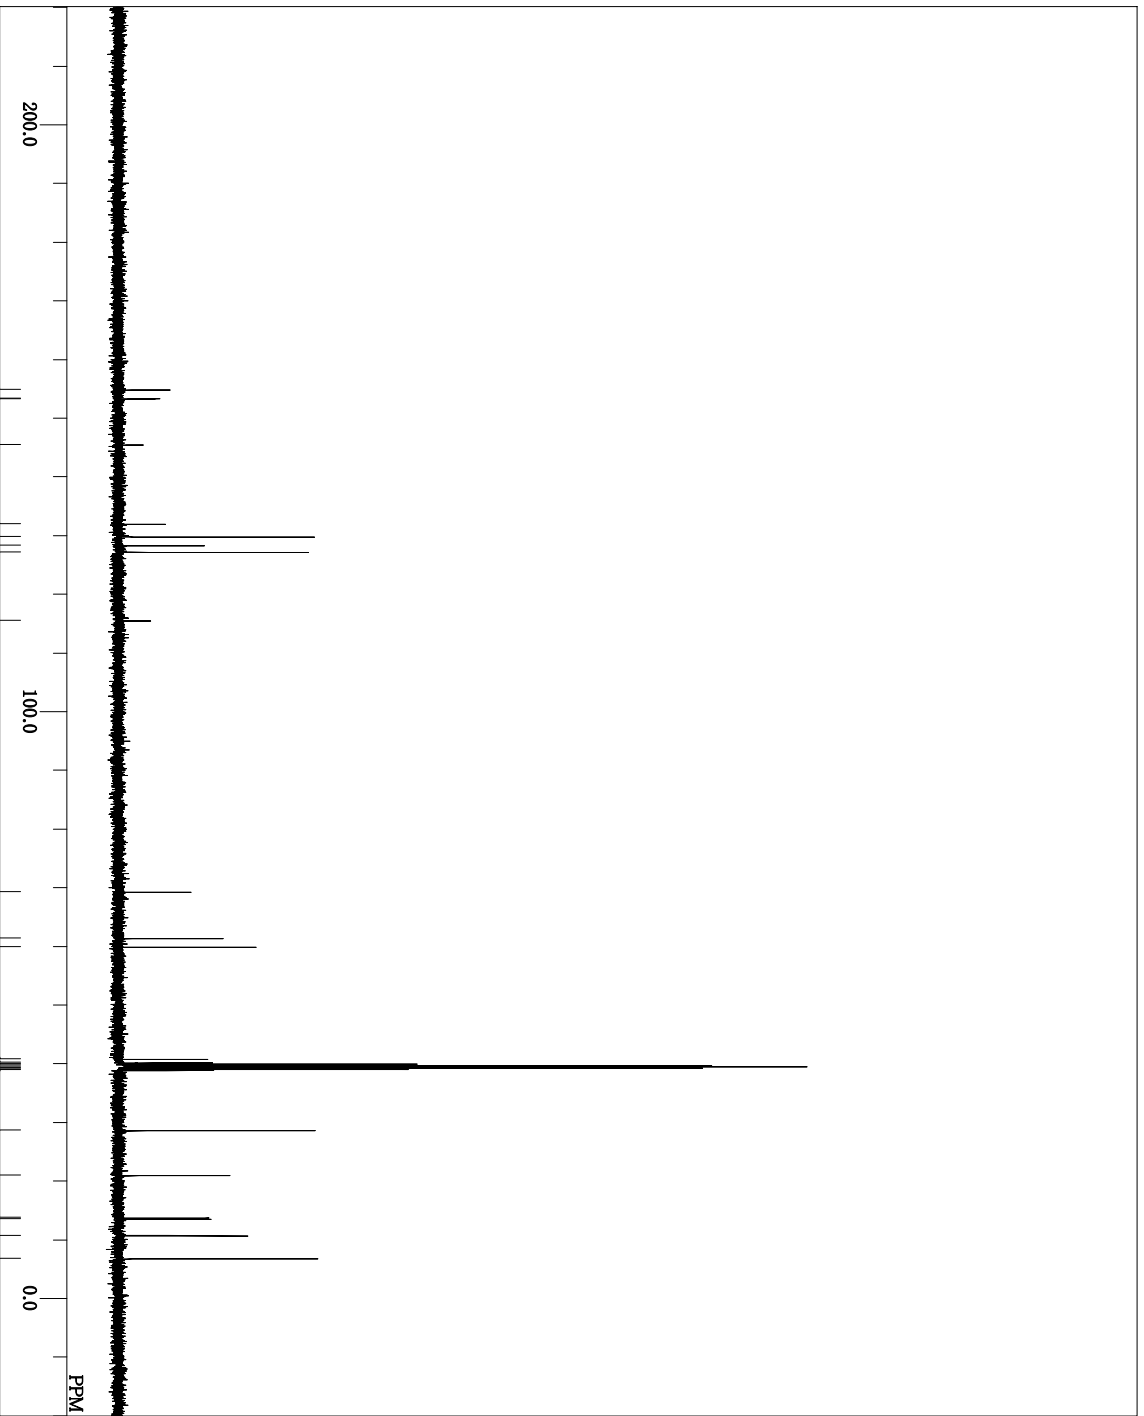

3JB

DRILE  
 COMINT  
 DATIM  
 OBNUC  
 EXMOD  
 OBFRO  
 OBFIN  
 POINT  
 PREQU  
 SCANS  
 ACQTM  
 PD  
 PW1  
 IRNUC  
 CTEMP  
 SLVNT  
 EXREF  
 BF  
 RGAIN

20200326 DPPH\_OME\_DMSO\_Proc  
 single\_pulse  
 2020-03-26 14:04:11  
 1H  
 proton, f1p  
 395.88 MHz  
 6.28 KHz  
 0.87 Hz  
 13107  
 5938.24 Hz  
 8  
 2.2073 sec  
 5.0000 sec  
 3.14 usec  
 19.7 c  
 DMSO  
 2.49 ppm  
 0.12 Hz  
 32

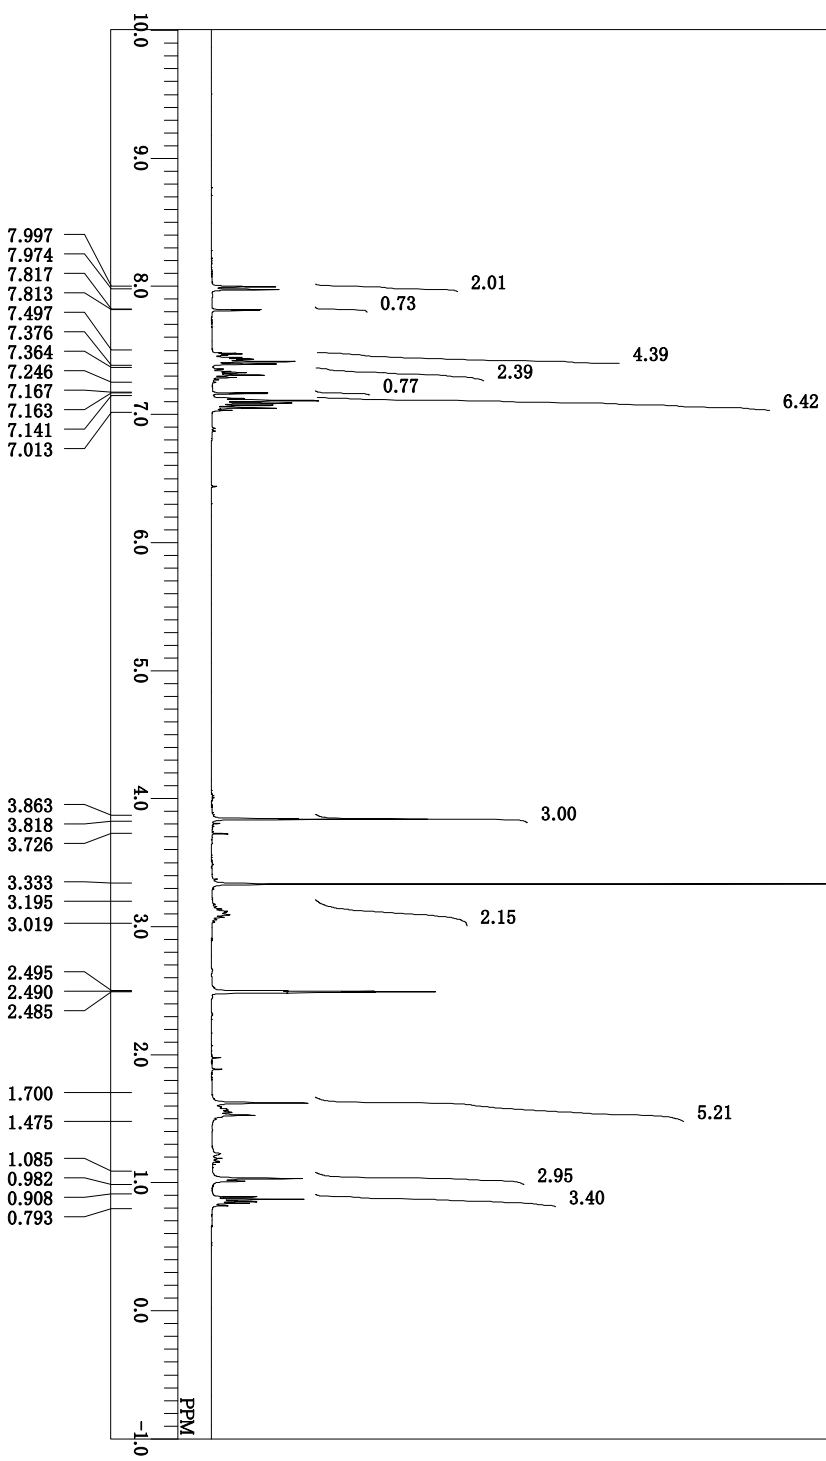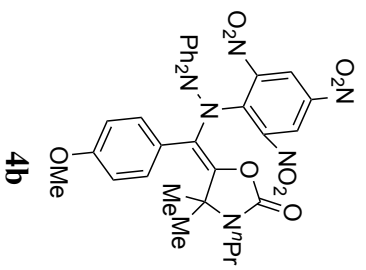

DRILE 20200326 DPPH\_OMe\_DMSO\_Carb  
 COMINT single pulse decoupled gated NOE  
 DATIM 2020-03-26 14:08:11  
 OBNUC 13C  
 EXMOD carbon, jrp  
 OBFREQ 99.55 MHz  
 OBFIN 5.13 KHz  
 POINT 0.98 Hz  
 26214  
 FREQU 25000.00 Hz  
 SCANS 2048  
 ACQTM 1.0486 sec  
 PD 2.0000 sec  
 PW1 3.59 usec  
 IRNUC 1H  
 CTEMP 19.9 c  
 DMSO  
 SLYNT 39.50 ppm  
 EXREF 0.12 Hz  
 BF 60  
 RGAIN

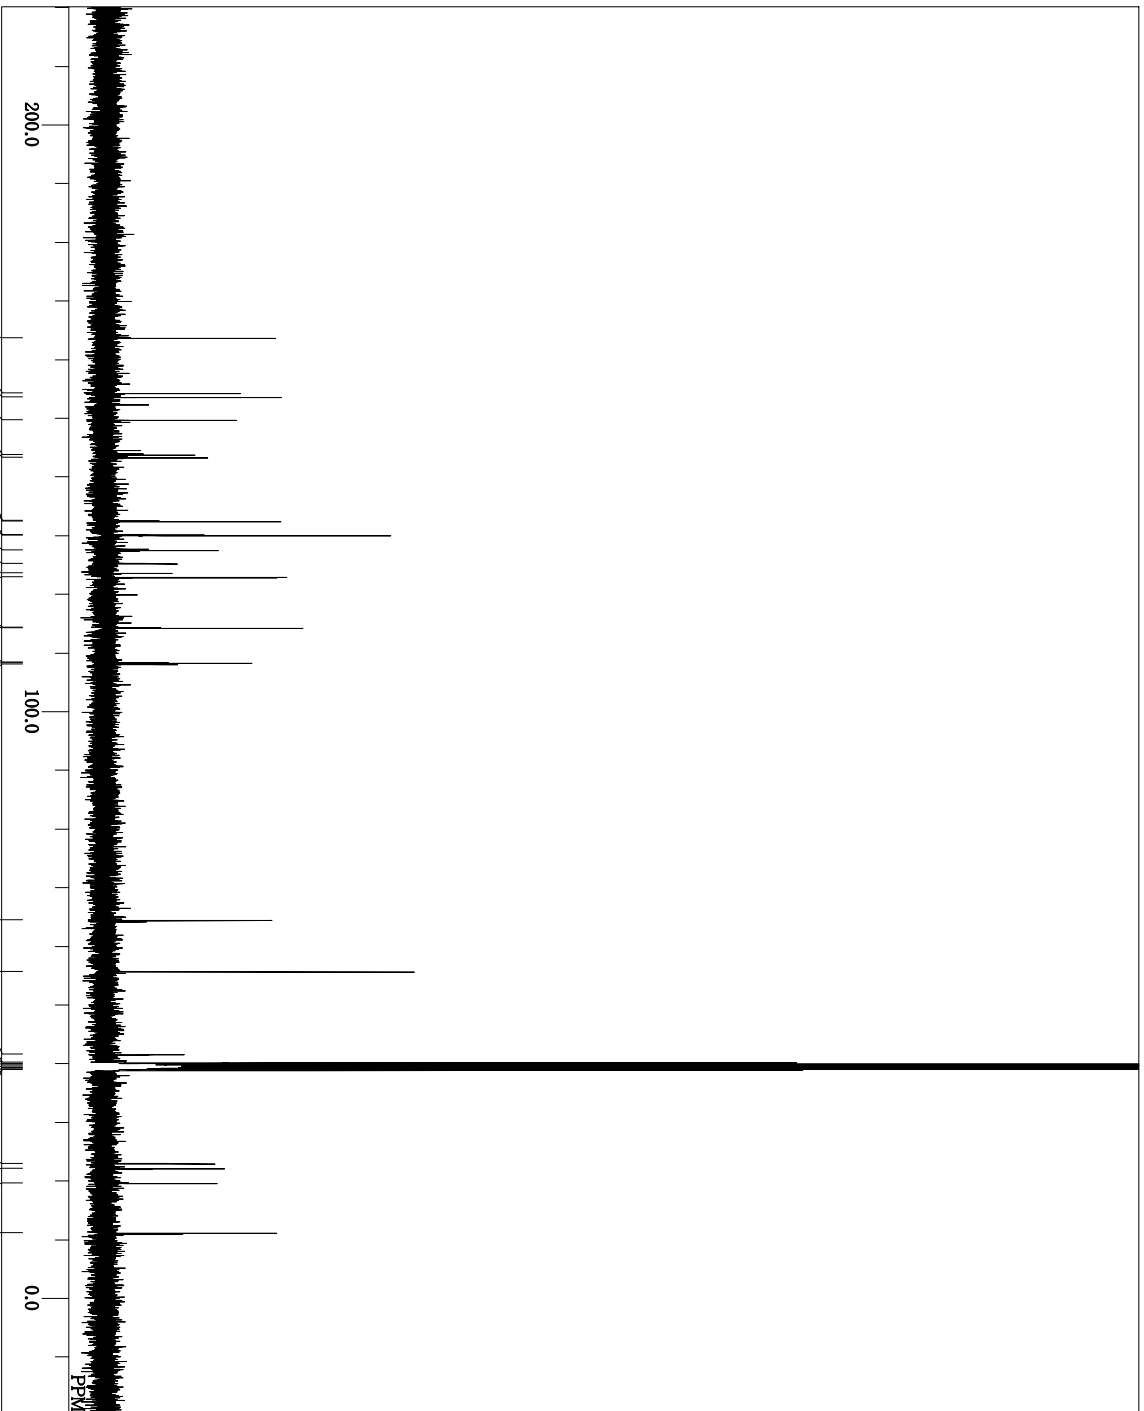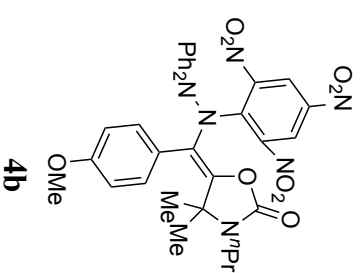

sadamitsu

20191023 ex2515\_pos 24 (0.384) Cm (24)

669.2296

[M+H]<sup>+</sup> calcd for C<sub>34</sub>H<sub>33</sub>N<sub>6</sub>O<sub>9</sub><sup>+</sup>, 669.2304

1: TOF MS ES+  
1.14e4

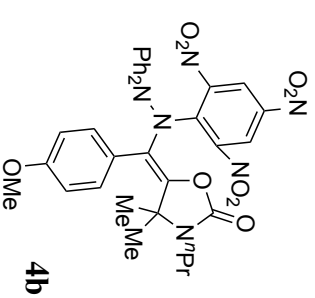

[M+K]<sup>+</sup> calcd for C<sub>34</sub>H<sub>32</sub>KN<sub>6</sub>O<sub>9</sub><sup>+</sup>, 707.1862

707.1800

[2M+K]<sup>+</sup> calcd for C<sub>68</sub>H<sub>64</sub>KN<sub>12</sub>O<sub>18</sub><sup>+</sup>, 1375.4093

1375.4611  
1376.4716

[2M+Na]<sup>+</sup> calcd for C<sub>68</sub>H<sub>64</sub>N<sub>12</sub>NaO<sub>18</sub><sup>+</sup>, 1359.4354

1359.4962  
1377.4644  
1378.4846

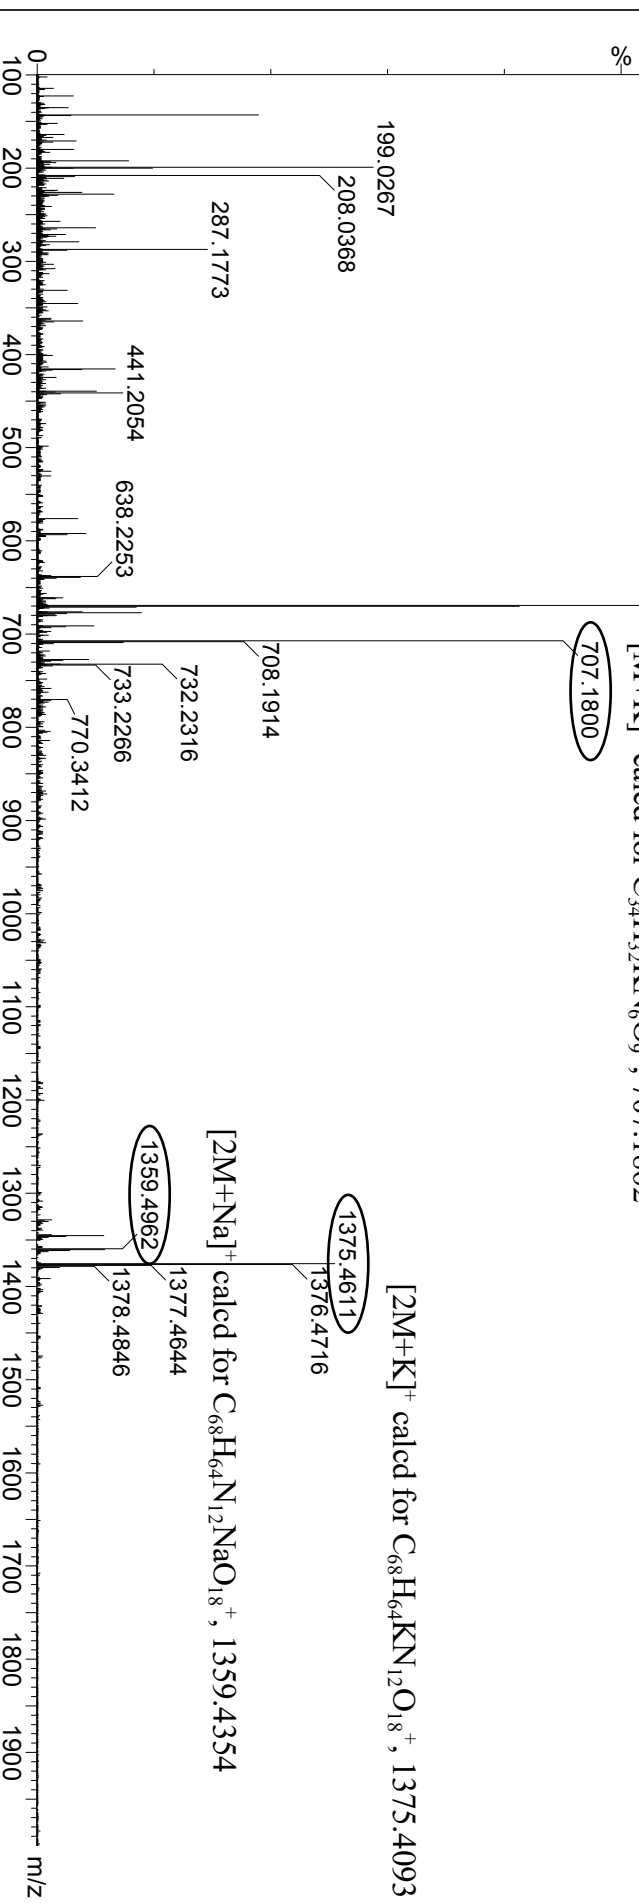

DRILE  
 COMINT  
 DATIM Thu Jul 02 22:04:32 2020  
 OBNUC 1H  
 EXMOD NON  
 OBFREQ 399.65 MHz  
 OBFIN 124.00 KHz  
 POINT 10500.00 Hz  
 16384  
 FREQU 7992.01 Hz  
 SCANS 8  
 ACQTM 2.0500 sec  
 PD 2.0000 sec  
 PW1 6.50 usec  
 IRNUC 1H  
 CTEMP 6348.8 c  
 SLYNT CD3CN  
 EXREF 1.93 ppm  
 BF 0.12 Hz  
 RGAIN 13

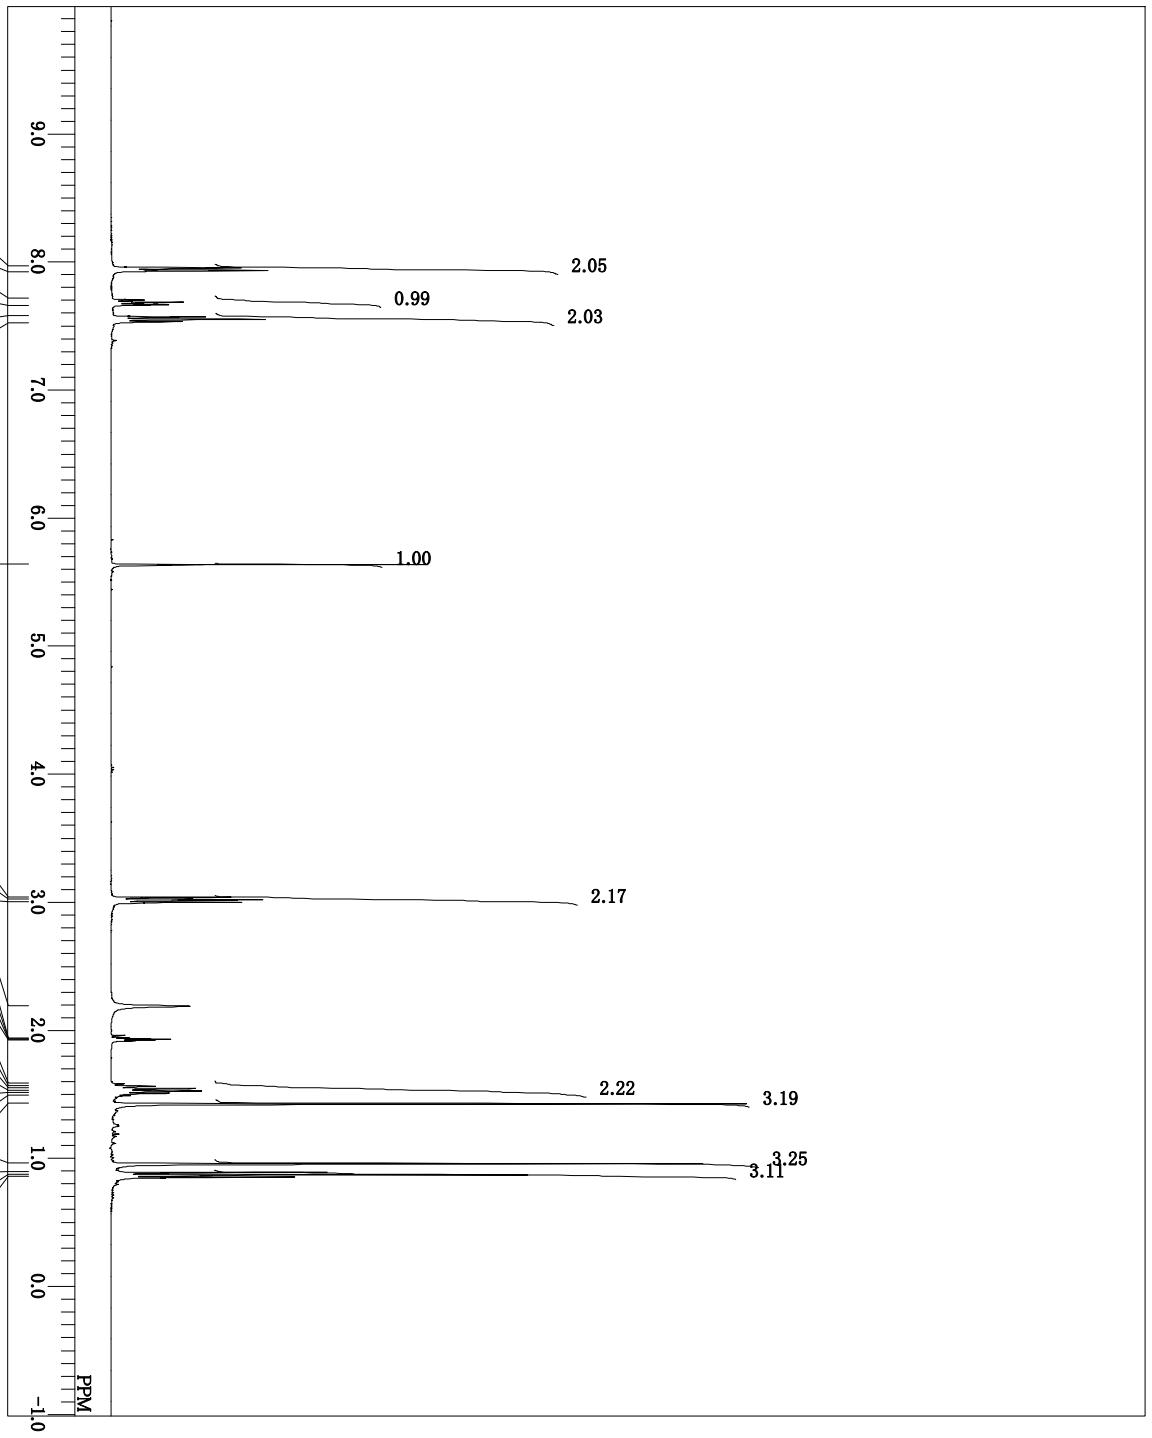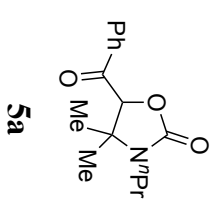

DRILE  
 COMINT  
 DATIM Thu Jul 02 22:17:28 2020  
 OBNUC 13C  
 EXMOD BCM  
 OPRQ 100.40 MHz  
 OBFIN 125.00 KHz  
 POINT 10500.00 Hz  
 32768  
 PREQU 27118.64 Hz  
 SCANS 112  
 ACQTM 1.2083 sec  
 PD 3.0000 sec  
 PW1 4.70 usec  
 IRNUC 1H  
 CTEMP 6348.8 c  
 CD3CN 118.20 ppm  
 SLVNT EXREF 1.20 Hz  
 BF 23  
 RGAIN

20200702\_bcm.als  
 Thu Jul 02 22:17:28 2020  
 13C  
 BCM  
 100.40 MHz  
 125.00 KHz  
 10500.00 Hz  
 32768  
 27118.64 Hz  
 112  
 1.2083 sec  
 3.0000 sec  
 4.70 usec  
 1H  
 6348.8 c  
 118.20 ppm  
 1.20 Hz  
 23

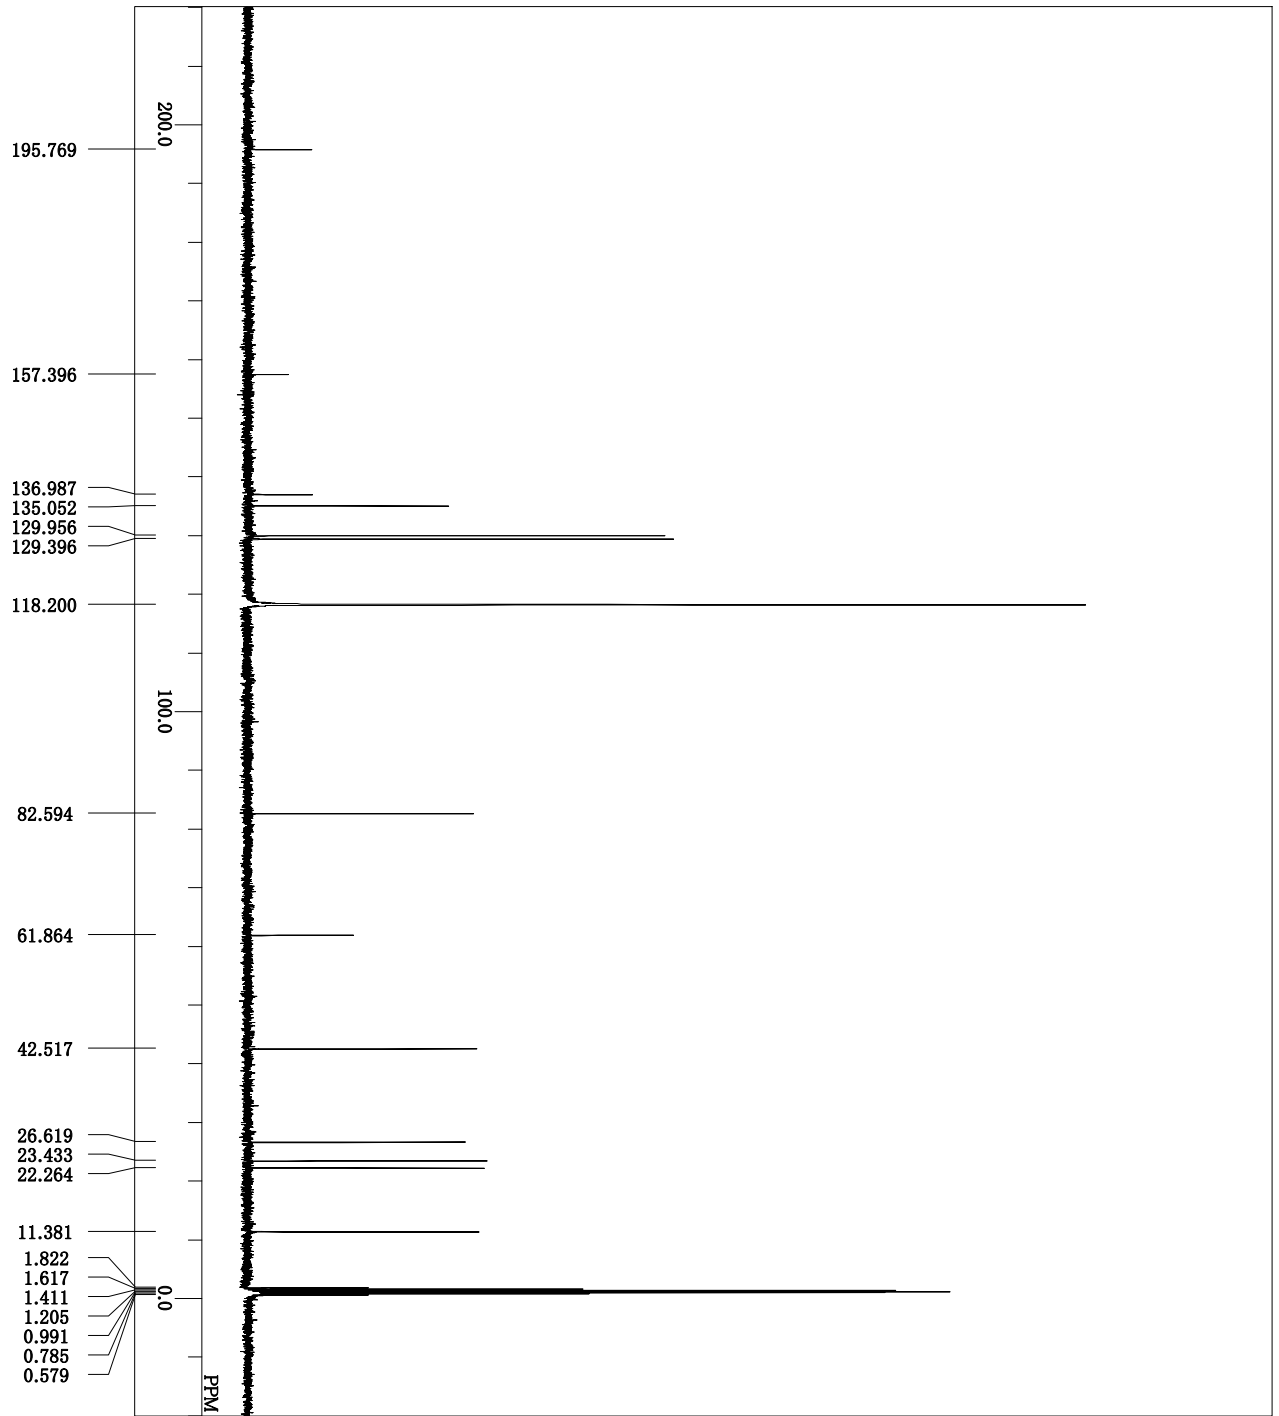

DR1E  
 COMINT  
 DATIM  
 OBNUC  
 EXMOD  
 OBRFQ  
 OBSET  
 OBFIN  
 POINT  
 PREQU  
 SCANS  
 ACQTM  
 PD  
 PW1  
 IRNUC  
 CTEMP  
 SLVNT  
 EXREF  
 BF  
 RGAIN

20200702\_NN\_clev\_Protom-1-2.als  
 single pulse  
 2020-07-02 18:41:50  
 1H  
 proton, 1p  
 395.88 MHz  
 6.28 KHz  
 0.87 Hz  
 16400  
 7422.80 Hz  
 8  
 2.2073 sec  
 5.0000 sec  
 3.14 usec  
 70.0 c  
 CD3CN  
 1.93 ppm  
 0.12 Hz  
 26

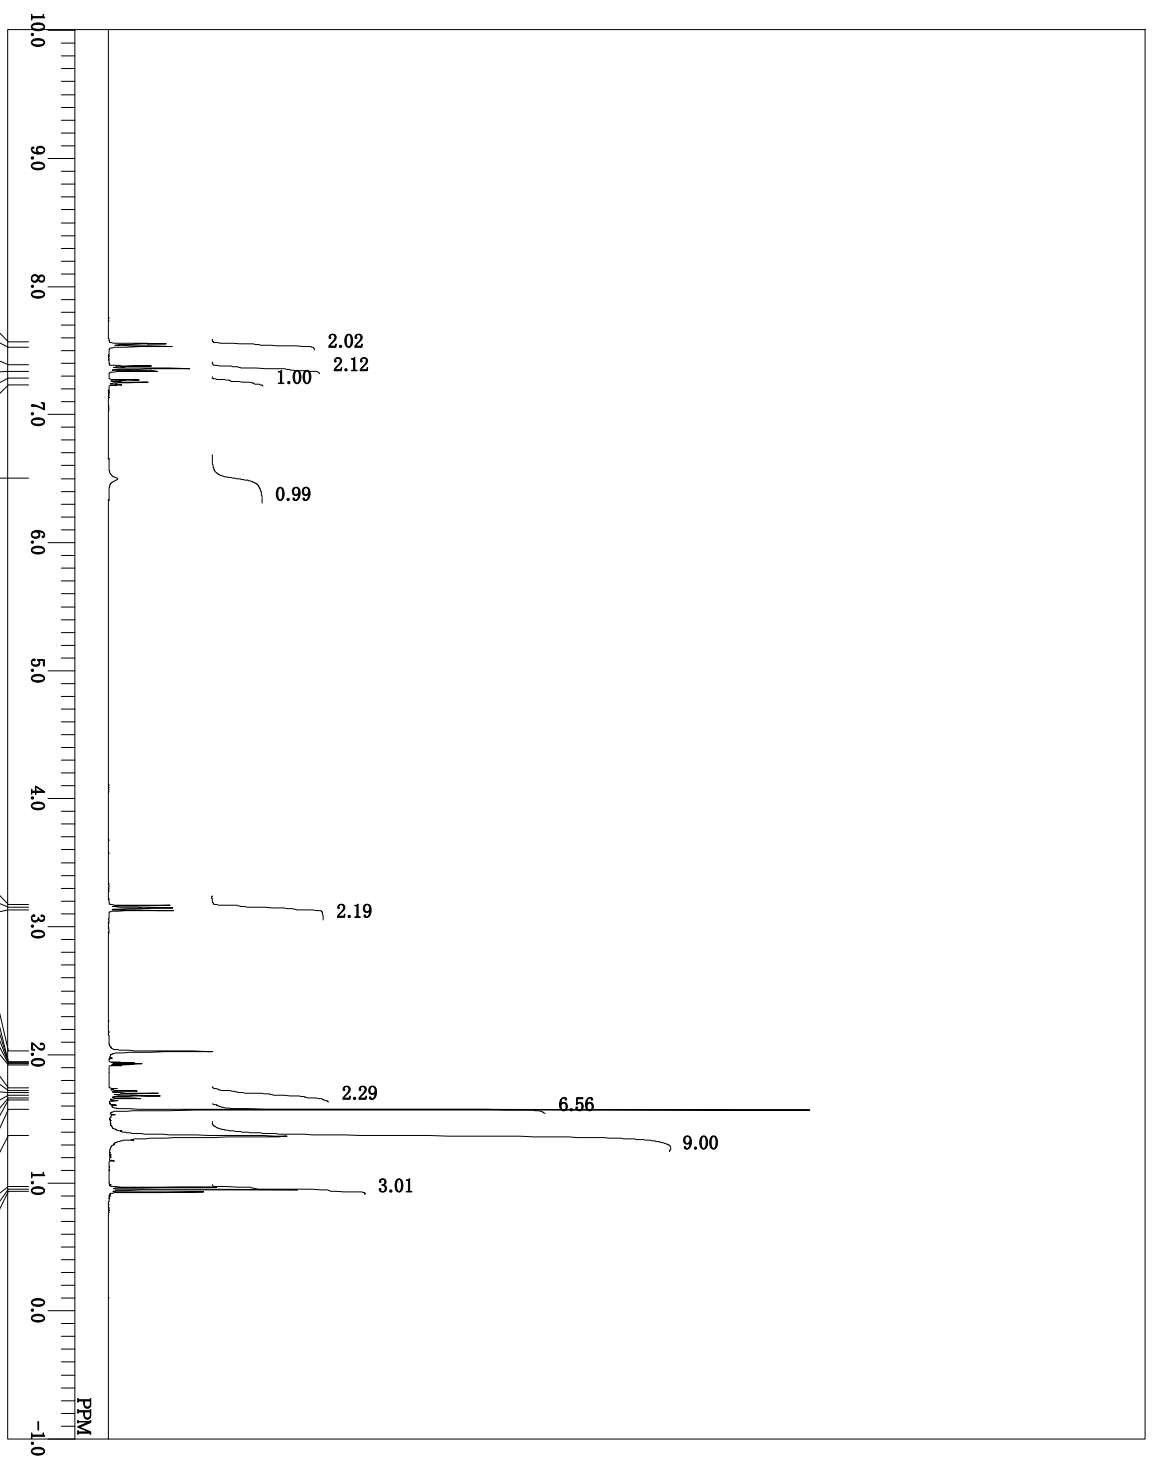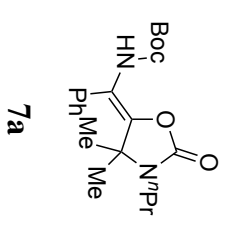

DRILE  
 COMINT  
 DATIM  
 2020-07-02 18:43:02  
 13C  
 carbon\_jrp  
 99.55 MHz  
 5.13 KHz  
 0.98 Hz  
 26224  
 POINT  
 OBFIN  
 25000.00 Hz  
 PREQU  
 512  
 SCANS  
 1.0486 sec  
 2.0000 sec  
 PD  
 3.59 usec  
 PW1  
 IRNUC  
 70.0 c  
 CTEMP  
 CD3CN  
 118.20 ppm  
 SLVNT  
 EXREF  
 0.12 Hz  
 BF  
 50  
 RGAIN

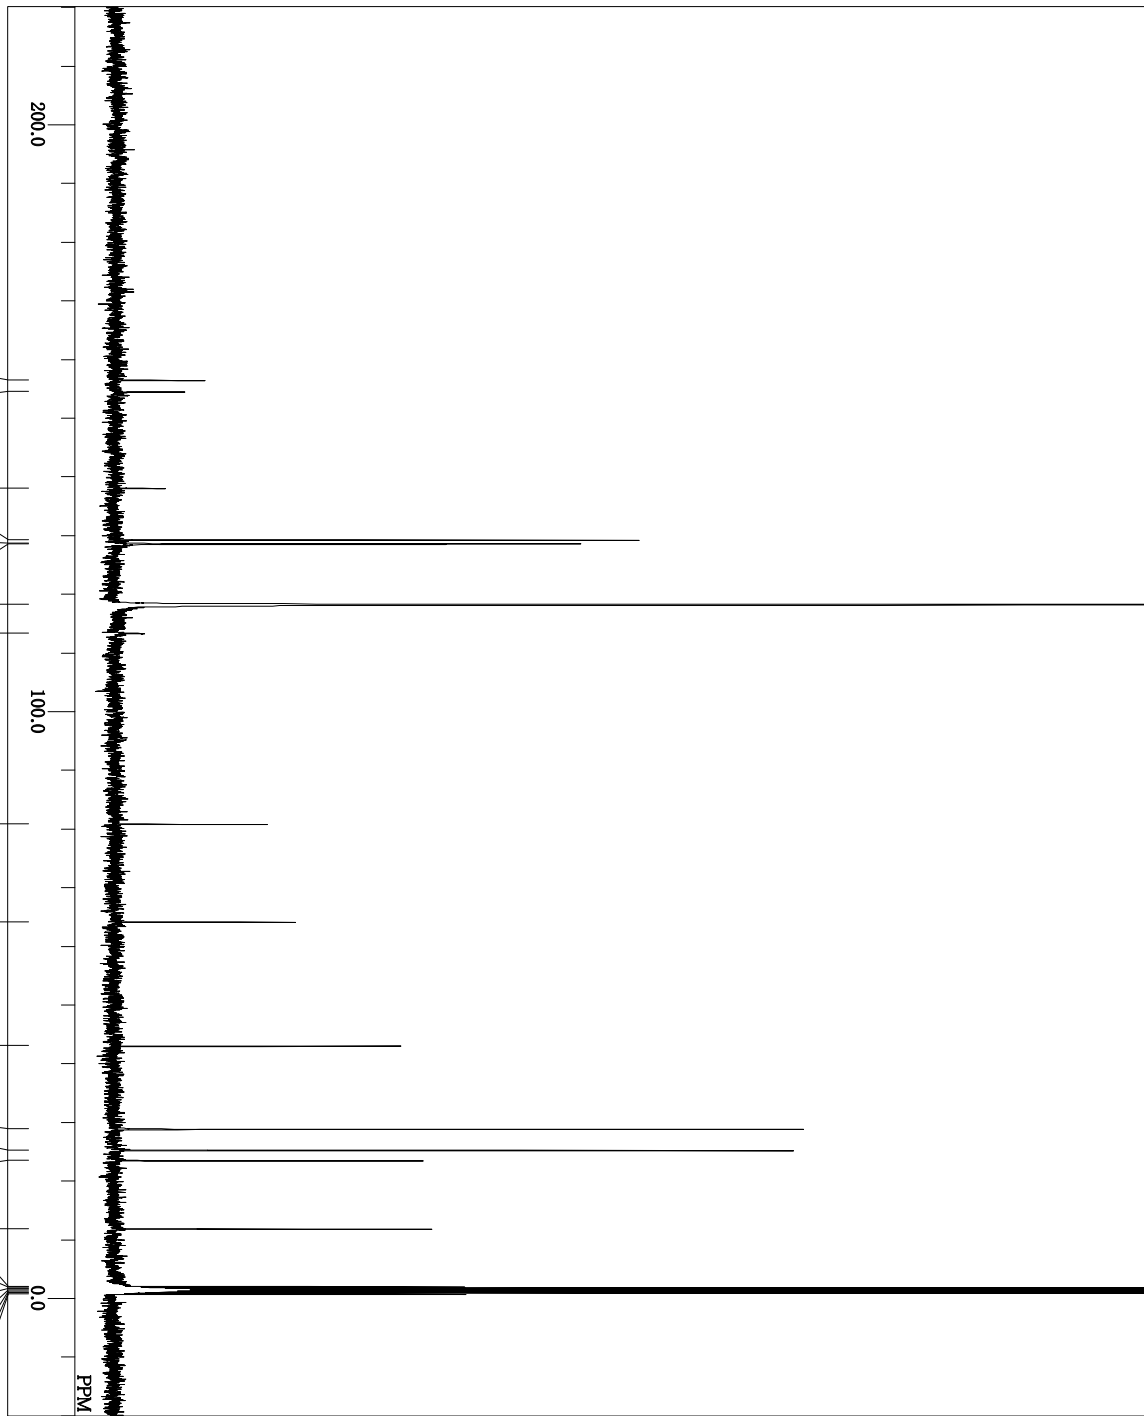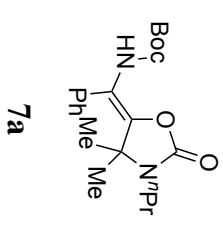

Supplement: d0cc02273j1.pdf [file d0cc02273j1.pdf]
